# Supplementary material for: Contribution of women’s development army to maternal and child health in Ethiopia: a systematic review of evidence
Source: PubMed Central journal article supplement — BMJ Open. 2019 May 22;9(5):e025937. doi: 10.1136/bmjopen-2018-025937 (PMC6538000; doi:10.1136/bmjopen-2018-025937), 2019-05-22
Supplement: bmjopen-2018-025937.draft_revisions.pdf [file bmjopen-2018-025937.draft_revisions.pdf]

# BMJ Open

BMJ Open is committed to open peer review. As part of this commitment we make the peer review history of every article we publish publicly available.

When an article is published we post the peer reviewers' comments and the authors' responses online. We also post the versions of the paper that were used during peer review. These are the versions that the peer review comments apply to.

The versions of the paper that follow are the versions that were submitted during the peer review process. They are not the versions of record or the final published versions. They should not be cited or distributed as the published version of this manuscript.

BMJ Open is an open access journal and the full, final, typeset and author-corrected version of record of the manuscript is available on our site with no access controls, subscription charges or pay-per-view fees (<http://bmjopen.bmj.com>).

If you have any questions on BMJ Open's open peer review process please email [info.bmjopen@bmj.com](mailto:info.bmjopen@bmj.com)

# BMJ Open

## Innovative approach to improve maternal health service in Ethiopia, Women's development army: A systematic review of evidences

|                               |                                                                                                                                                                                                                                                                                                                   |
|-------------------------------|-------------------------------------------------------------------------------------------------------------------------------------------------------------------------------------------------------------------------------------------------------------------------------------------------------------------|
| Journal:                      | <i>BMJ Open</i>                                                                                                                                                                                                                                                                                                   |
| Manuscript ID                 | bmjopen-2018-025937                                                                                                                                                                                                                                                                                               |
| Article Type:                 | Research                                                                                                                                                                                                                                                                                                          |
| Date Submitted by the Author: | 12-Aug-2018                                                                                                                                                                                                                                                                                                       |
| Complete List of Authors:     | Yitbarek, Kiddus; Jimma University, Health Policy and Management<br>Abraham, Gelila; Jimma University, Health Policy and Management<br>Sudhakar, Morankar ; Jimma University, Health behaviors and society;<br>Jimma University, Jimma University Rapid Review Response Center:<br>AHPSR/WHO Center of Excellence |
| Keywords:                     | Women's development army, Maternal and child health, Ethiopia                                                                                                                                                                                                                                                     |
|                               |                                                                                                                                                                                                                                                                                                                   |

SCHOLARONE™  
Manuscripts

Peer Review Only

1  
2  
3  
4 **Innovative approach to improve maternal health service in Ethiopia,**  
5 **Women's development army: A systematic review of evidences**  
6  
7

8 Kiddus Yitbarek<sup>1\*</sup> Gelila Abraham<sup>1</sup> Morankar Sudhakar<sup>2,3</sup>  
9

10 <sup>1</sup>Department of Health Policy and Management, Faculty of Public Health, Jimma University,  
11 Ethiopia, <sup>2</sup>Department of Health Behaviors and Society, Faculty of Public Health, Jimma  
12 University, Ethiopia, <sup>3</sup>The Ethiopian Evidenced Based Healthcare and Development Centre: A  
13 Joanna Briggs Institute Centre of Excellence  
14  
15

16  
17  
18 \*Corresponding author  
19

20 Email: [kiddus.yitbarek@ju.edu.et](mailto:kiddus.yitbarek@ju.edu.et) or [kiddus.yitbarek@yahoo.com](mailto:kiddus.yitbarek@yahoo.com)  
21

22 **Word count: 5680**  
23  
24  
25  
26  
27  
28  
29  
30  
31  
32  
33  
34  
35  
36  
37  
38  
39  
40  
41  
42  
43  
44  
45  
46  
47  
48  
49  
50  
51  
52  
53  
54  
55  
56  
57  
58  
59  
60

## Abstract

**Purpose:** the aim of this review was to assess the contribution of women's development army (female voluntary community workers) on maternal and child health development.

**Outcome:** maternal and child health services; maternal and child mortality

**Design:** A systematic review was conducted incorporating both quantitative and qualitative evidences from peer reviewed journals. The search was conducted in three databases.

**Setting:** English articles conducted 2010 onwards in Ethiopia were considered.

**Participants:** Out of 299 extracted papers only nine were included in data synthesis. Data were extracted from papers included in the review using pre planned data extraction tool separately for each study design. Findings from the included studies were synthesized using tables and narrative summary.

**Results:** Nine studies met the inclusion criteria and were included in the review. The results revealed that, poor participation and non-membership in women's development army were predictors of maternal death and default from child immunization. On the other hand, distance of women's development group within two kilometers from health facility is a determinant factor for skilled delivery and antenatal care service use. These groups were the main sources of information for mothers for birth preparedness and complication readiness. Moreover, well established groups have strengthened the linkage of the health facility to the community so that, delays in maternal health service use were minimized; health extension workers could effectively refer women to health facility for birth; and skilled birth attendance was improved.

**Conclusion:** Membership and well-functioning of women's development army has a positive impact on child immunization service use, minimizing delays on maternal health services use and minimizing maternal mortality, and improving birth preparedness, complication readiness and antenatal care and skilled delivery. It is also effective and efficient mechanism to share information to the community and create linkage between the communities with the primary health care system.

**Keywords:** Women's development army, Maternal and child health, Ethiopia

## Article summary

### Strengths and limitations of this study

- The review has used two independent reviewers
- The review has used structured procedure during literature search, appraisal, data collection and synthesis
- Despite the strengths described above, we haven't conducted meta-analysis due to heterogeneous types of study designs and population included in this review
- We have included only full text articles found free online

## Introduction

Evidence from various countries in the world disclosed that community volunteers' health service intervention has shown significant health impact.<sup>1,2</sup> They accomplish various functions related to health service delivery. In fact, usually they do not have formal professional or paraprofessional education and can be involved in voluntary care. They intervene in health care after attending job related trainings. These community health volunteers have different naming in different settings for example, lay health workers, community health workers, and unpaid community volunteers.<sup>3,4</sup>

Community health volunteers have a great importance especially in less developed countries so as to overcome the increasing demand for health care services and the shortage of formal health care providers.<sup>5</sup> After Alma Ata declaration of Primary Health Care (PHC), community involvement in the health care was given due attention in order to improve wide access and acceptance of the services by service users and the community at large. It is believed that, problems cannot be solved from only the side of service providers and programmers. Moreover, it is a good strategy to mobilize resources relevant to health services.<sup>6-8</sup>

These health interventions using community volunteers has a sort of structure in some countries and unstructured in others.<sup>1,5</sup> Some nations linked the service under their PHC structure. Ethiopia is a good example of well-structured community health interventions. The primary health care unit (PHCU) is in the front line to PHC in the country. This system encompasses five satellite health posts (the lowest village-level health service facility) and a referral health center (HC). In the countries health care system PHC is administered and the services facilitated in this point.<sup>9</sup> So as to address the deficit in human resources for health, Ethiopia launched the community health extension program (HEP) in 2004. It was implemented by establishing a health post and positioning two female health extension workers (HEWs) in every *kebele* (the smallest administrative division in Ethiopia). The HEP was launched to improve access to preventive essential health services and to create a healthy environment. This program works to increase and sustain preventive health actions and health awareness. HEP has sixteen packages divided in to four major categories.<sup>9-11</sup>

1  
2  
3 Six years after its introduction in 2010 a new innovative approach, Women's Development Army  
4 (WDA) strategy was linked with HEP. This army has various development roles, from which  
5 health is the major one.<sup>9</sup> At the community level, members of the community linked with the  
6 PHC system through this strategy.<sup>12</sup> It was adopted based on the experience that using a network  
7 of the community health volunteers increased the efficiency of the HEWs in reaching households  
8 with actionable health messages. Women's development teams (WDTs) involving up to 30  
9 households within the same neighborhood have to be developed for functional WDA. The WDT  
10 made its base on "one-to-five" connections, smaller groups of six members (households).<sup>10,13,14</sup>

11  
12 This system has its own structural arrangement. The group's developmental works monitored in  
13 a meeting every two weeks by a command post formulated at the *kebele* level which is led by the  
14 *kebele* leader. Similar follow-up undertaken by the development group leaders to the one-to-five  
15 networks.<sup>9</sup> WDTs and the one-to-five networks leaders elected with full participation of the  
16 members. Their trust worthiness to the team members and being model family are being  
17 considered as criteria for selection. Model families recognized when they fully implement the all  
18 HEP packages or perform with distinction among the group members.<sup>15</sup>

19  
20 Health extension workers in collaboration with *kebele* administration and personnel from other  
21 developmental sectors facilitate formation of the WDTs and the one-to-five networks. These  
22 unpaid health volunteers, WDT leaders, undertake various preventive and promotive health  
23 services in collaboration with HEWs. They carry out a number of tasks, including, support  
24 during health information delivery programs, keeping track of pregnancies and illnesses, helping  
25 during immunization campaigns, and transmitting messages between households and HEWs.<sup>9,10</sup>

26  
27 The Ethiopian unpaid community health intervention has its unique structural arrangement. It is  
28 included in various development sectors' strategic plan.<sup>13</sup> Some evidences claim that the  
29 program has variations in aims, goals, and experiences among various players included and  
30 suggests further researchers.<sup>16</sup>

31  
32 This review aimed to assess the contribution of this structured community involvement in health  
33 service delivery. This was the reason for the existence of the structural arrangement. Finally it  
34 will come up with strong evidence to say the WDA structure has an impact in the development

1  
2  
3 of the country's health. Moreover it will suggest a way to continue and/or extend the intervention  
4 for the future.  
5

## 6 7 **Methods**

### 8 9 **Search Strategy**

10  
11 The search strategy targeted to find both published and unpublished studies. A step by step  
12 search strategy was utilized in this review. Primarily, major databases that comprise health  
13 system researches including MEDLINE, CINAHL, EBSCOhost, World Health Organization  
14 library database were utilized. Unpublished works were also searched from ProQuest  
15 Dissertations and Theses and Google Scholar. Afterwards, the reference list of all identified  
16 reports and articles were searched for additional studies. Studies conducted in Ethiopia, 2010  
17 onwards and published in English language were considered for inclusion in this review. By the  
18 year 2010 WDA was introduced in Ethiopia. Key words initially used were: community health  
19 workers, community volunteer, women's development army, women's development group,  
20 women's development team, health development team, lay health workers, health development  
21 army, Ethiopia, maternal health, child health and maternal health services. Extracted references  
22 were downloaded and stored in Mendeley reference manager file. MEDLINE (on PubMed  
23 platform) search strategy is included in supplementary file I.  
24  
25

26  
27 To guide the overall review, PRISMA flow diagram was used.<sup>17</sup> (Figure 1) Starting from  
28 identification of records up to inclusion of the relevant literatures for the review question were  
29 documented to comprehensive and accurate reporting.  
30  
31

### 32 33 **Inclusion and exclusion criteria**

34  
35 Both quantitative and qualitative studies were included in this review. Women in reproductive  
36 age group (14-49 years) and children less than five years from both sexes were considered in the  
37 review. The quantitative component of the review has considered studies that evaluated the effect  
38 of women's development army, and participation in the group, on maternal mortality, maternal  
39 and child health service use, health literacy and referral linkage. Similarly the qualitative  
40 component of this review has considered studies that investigated contribution of WDA to  
41 maternal and child health development.  
42  
43  
44  
45  
46  
47  
48  
49  
50  
51  
52  
53  
54  
55  
56  
57  
58  
59  
60



1  
2  
3 The women's development army approach was launched in Ethiopia since 2010 to support the  
4 HEP that was introduced six years back in 2004.<sup>14</sup> The main concern for its existence is better  
5 implementation of health extension packages.<sup>11</sup> This review considered studies that included  
6 outcomes like maternal health, maternal mortality, ANC, delivery, family planning, birth  
7 preparedness and complication readiness.  
8  
9

10  
11  
12 The quantitative component of the review considered cross-sectional and case control studies for  
13 inclusion. On the other hand the qualitative component of the review considered studies that  
14 focus on qualitative data, but not limited to study designs.  
15  
16

### 17 **Description of studies**

18  
19  
20 Eleven potentially relevant studies were found in addition to the three hundred fifty two studies  
21 identified in database searches. A total of 299 articles were eligible for primary examination after  
22 duplications were removed. On reviewing titles and abstracts against the review objectives and  
23 inclusion criteria, 276 studies were excluded. The full text of the remaining 23 studies was  
24 retrieved for detailed examination and 9 were excluded. Afterwards, 14 studies were assessed for  
25 methodological quality. After the appraisal five studies that didn't met the minimum  
26 requirements of methodological appraisal tools were excluded and nine were used for the review.  
27  
28  
29  
30  
31

### 32 **Patient and Public Involvement**

33  
34  
35 Patients and/or public were not involved in this review.  
36

### 37 **Data collection**

38  
39  
40 Two independent reviewers collected information relevant for the review. Before data collection  
41 all titles and abstracts of the searched literatures were assessed for potential relevance; and those  
42 records deemed not relevant were verified. Later on, full-text reports were assessed for  
43 eligibility. All possible ways were used to obtain full text articles for those that were not  
44 available online. Some full articles were obtained from research-gate authors pages. Reports that  
45 are co-publications or multiple reports of the same study were identified. The eligibility criteria  
46 were applied to all reports. Only evidence thoughtful of the review's eligibility criteria were  
47 included.  
48  
49  
50  
51  
52

53  
54 All papers selected for inclusion in the review were subjected to appraisal prior to inclusion in  
55 the review using critical appraisal instruments from the Joanna Briggs Institute (JBI). The critical  
56  
57

1  
2  
3 appraisal tool is different for each study design used (Supplementary file II). Case control and  
4 qualitative studies' appraisal checklist have ten methodological assessment items but the cross-  
5 sectional checklist has eight. Those studies fulfilled more than 70% of the requirements were  
6 selected to be included in the review.  
7  
8  
9

10 Data extraction was for quantitative and qualitative studies separately using pre designed  
11 checklists (Supplementary file III). The extracted data has included specific details about the  
12 interventions, populations, study methods and outcomes of significance to the review question  
13 and objectives (Supplementary file IV).  
14  
15  
16  
17

### 18 **Data synthesis and analysis**

19 Findings from the included studies were synthesized using tables and a narrative summary.  
20 Meta-analysis was not possible since the included studies were heterogeneous in terms of the  
21 populations, methods and outcomes. The results categorized in to three major sub sections,  
22 participation in WDGs, and distance of WDGs from health facility and effective functioning of  
23 WDGs.  
24  
25  
26  
27  
28  
29  
30  
31  
32  
33  
34  
35  
36  
37  
38  
39  
40  
41  
42  
43  
44  
45  
46  
47  
48  
49  
50  
51  
52  
53  
54  
55  
56  
57  
58  
59  
60

## Results: Findings of the Review

We have included a total of nine studies regardless of their study design. These studies met the critical appraisal requirements more than 70% (Supplementary file V). The review comprised both observational and qualitative studies. The studies were conducted on various maternal and child health issues including child immunization, maternal mortality, birth preparedness and complication readiness (BPCR), skilled delivery, ANC, linking pregnant women with health facilities for delivery, delays on maternal health services and community relationships with health extension workers and health sector (Table 1).

Table 1: Characteristics of included studies for review

| Category                                | Sub-category                                 | Frequency | Percentage (%) |
|-----------------------------------------|----------------------------------------------|-----------|----------------|
| Study design                            | Cross-sectional                              | 3         | 33.33          |
|                                         | Case-control                                 | 2         | 22.22          |
|                                         | Qualitative                                  | 4         | 44.44          |
| Year of publication                     | 2015                                         | 2         | 22.22          |
|                                         | 2016                                         | 3         | 33.33          |
|                                         | 2017                                         | 3         | 33.33          |
|                                         | 2018                                         | 1         | 11.11          |
| Addressed maternal & child health issue | Child immunization                           | 1         | 11.11          |
|                                         | Skilled maternal health service              | 1         | 11.11          |
|                                         | Maternal mortality                           | 1         | 11.11          |
|                                         | BPCR                                         | 2         | 22.22          |
|                                         | Relationship of community with health sector | 2         | 22.22          |
|                                         | Maternal health services use                 | 2         | 22.22          |

## Narrative synthesis

### Participation in WDGs

In a study by Aregawi et al<sup>18</sup> 270 study subjects were included. From them 90 were defaulters from completion of child immunization (cases) and 180 were non defaulters (controls). 14(15.6%) of cases and 89(49.4%) of controls had satisfactory participation in WDGs. Result of statistical analysis showed that poor participation in women's developmental groups [AOR = 3.3,95%CI 1.54±7.08] is a determinant for defaulting immunization among children aged between 9 and 23 months.

A study by Godefay et al.<sup>19</sup> has included 310 study participants. Among them 62 were dead mothers (cases) and 248 alive mothers (controls). From 62 died mothers 40 (64.5%) were members of WDTs and among 248 alive mothers 197 (79.4%) were members of WDTs. The statistical test revealed that women who were not members of the voluntary women's development group were more likely to experience maternal death [OR 2.07, 95%CI 1.04–4.11] (Table 2).

Table 2: Summary of evidences on the effect of participation in women's development group on maternal and child health service

| Author, year                                        | Target population                     | Study design | Outcome                                                               | Result                                                                                                     |
|-----------------------------------------------------|---------------------------------------|--------------|-----------------------------------------------------------------------|------------------------------------------------------------------------------------------------------------|
| Aregawi HG, Gebrehiwot TG et al, 2017 <sup>18</sup> | Children aged between 9 and 23 months | Case control | Default from immunization among children aged between 9 and 23 months | Poor participation in WDGs (AOR = 3.3, 95%CI 1.54±7.08) is a determinant for defaulting                    |
| Godefay H, Byass P et al, 2015 <sup>19</sup>        | Mothers in reproductive age group     | Case control | Maternal mortality                                                    | Women who were not members of WDG were more likely to experience maternal death (OR 2.07, 95%CI 1.04–4.11) |

### Distance of WDGs from health facility

In a study by Negero MG. et al<sup>20</sup> 748 reproductive-age women who gave birth in 1 year preceding the study in 380 clusters of WDA were included. 336 (45%) of women have received skilled delivery care and the remaining 412 haven't received. A significant heterogeneity was observed between "Women's Development Teams (clusters)" for skilled delivery care service utilization which explains about 62% of the total variation. The distance of WDTs within 2 km radius from the nearest health facility was significantly associated [AOR (95% CI) 6.03 (1.92, 18.93)] with skilled delivery service utilization. The performance level of WDTs has no significant effect on skilled delivery care service utilization. Best performing [AOR (95% CI) 2.14 (0.38, 12.27)] and good performing [AOR (95% CI) 4.38 (0.75, 25.56)].

Another cross-sectional study was conducted by Girmaye M. and Berhan Y.<sup>21</sup> which assessed 748 reproductive-age women who gave birth in 1 year preceding the study. 531 (71%) of the participants received skilled ANC service at least once. Similar to the above study, significant heterogeneity was observed between WDTs for skilled ANC utilization. Distance of WDA within 2 km radius from the nearest health facility was significant predictor of skilled ANC service utilization [AOR=8.28; 95%CI, 1.08-62.20] (Table 3).

Table 3: Summary of evidences on the effect of women's development groups' distance from health facility on maternal health service

| Author, year                                    | Target population                                                   | Study design    | Outcome                              | Result                                                                                                                                                                    |
|-------------------------------------------------|---------------------------------------------------------------------|-----------------|--------------------------------------|---------------------------------------------------------------------------------------------------------------------------------------------------------------------------|
| Negero MG, Mitike YB, et al, 2018 <sup>20</sup> | Reproductive-age women who gave birth in 1 year preceding the study | Cross-sectional | Skilled delivery service utilization | The distance of WDTs within 2 km radius from the nearest health facility was significantly associated with skilled delivery service use [AOR (95% CI) 6.03 (1.92, 18.93)] |
| Girmaye M. and Berhan Y., 2016 <sup>21</sup>    | Reproductive-age women who gave birth in 1 year preceding the study | Cross-sectional | Skilled antenatal care utilization   | Distance of WDT within 2 km radius from the nearest health facility was significant predictor of skilled ANC service utilization [AOR=8.28; 95%CI, 1.08-62.20]            |

### Effective functioning of WDGs

A study by Zepre K. and Kaba M.<sup>22</sup> has assessed 454 women. 168 respondents were found to have prepared for birth and its complications and 286 were not. 30 (68.2%) of members and 134 (34.7%) of non-members of one-to-five connection were prepared for birth and its complication. The statistical assessment showed that those who got information from their one-to-five

connection are more likely to prepare for birth and its complications [OR 2.52, 95% CI 1.17, 5.39].

A study by Jackson R. and Hailemariam A.<sup>23</sup> has assessed the role of HEWs in linking pregnant women with health facilities for delivery. The target of the study were pregnant women. The result revealed that HEWs can effectively refer more women to give birth in health facilities when the WDA is well established.

A study by Jackson R., Tesfay FH. et al<sup>24</sup> was aimed to document factors that hinder or enable strategies to reduce the first and second delays of the three delays in rural and pastoralist areas in Ethiopia. The study concluded that initiatives to reduce delays can improve access to maternal health services, especially when Health Extension Workers are supported by the Health Development Army.

Another study conducted by Jackson R., Tesfay FH. et al<sup>25</sup> aimed at studying health extension workers' and mothers' attitudes to maternal health service utilization and acceptance. And the result uncovered that, with the support of WDGs, HEWs have increased the rate of skilled birth attendance by calling ambulances to transfer women to health centers either before their expected date of delivery (EDD) or when labor starts at home. These findings add to the growing body of evidence that health workers at the community level can work with women's groups to improve maternal health, thus reducing the need for emergency obstetric care in low-income countries.

A study by Kok MC. et al.<sup>26</sup> has addressed health extension workers' relationships with the community and health sector in Ethiopia: opportunities for enhancing maternal health performance. This assessment found that the health development army supported HEWs in liaising with community members (Table 4).

Table 4: Summary of evidence in the effect of women's development army's effective functioning on maternal health services

| Author, year                           | Target population | Study design    | Outcome                                       | Result                                                       |
|----------------------------------------|-------------------|-----------------|-----------------------------------------------|--------------------------------------------------------------|
| Zepre K and Kaba M, 2017 <sup>22</sup> | Pregnant women    | Cross-sectional | Birth preparedness and complication readiness | Those who got information from their one-to-five connections |

|                                                   |                  |             |                                                            |                                                                                                                             |
|---------------------------------------------------|------------------|-------------|------------------------------------------------------------|-----------------------------------------------------------------------------------------------------------------------------|
|                                                   |                  |             |                                                            | are more likely to prepare for birth and its complications (OR 2.52, 95%CI 1.17, 5.39)                                      |
| Jackson R. and Hailemariam A., 2016 <sup>23</sup> | Pregnant women   | Qualitative | Linking pregnant women with health facilities for delivery | HEWs can effectively refer more women to give birth in health facilities when the WDA is well established.                  |
| Jackson R., Tesfay FH. et al, 2017 <sup>24</sup>  | Pregnant women   | Qualitative | Delays in maternal health service use                      | Initiatives to reduce delays can improve access to maternal health services, especially when HEWs are supported by the WDA. |
| Jackson R., Tesfay FH. et al, 2016 <sup>25</sup>  | Mothers and HEWs | Qualitative | Maternal health service utilization and acceptance         | With the support of WDGs, HEWs have increased the rate of skilled birth attendance                                          |
| Kok MC., Kea AZ; et al., 2015 <sup>26</sup>       | Mothers and HEWs | Qualitative | Relationship of community with HEWs and Health sector      | The WAD supported HEWs in liaising with community members                                                                   |

## Discussion

The main objective of this systematic review was to assess the Ethiopian innovative women's voluntary health intervention's (women's development army's) contribution to maternal and child health development. The major activity of this structure is supporting the primary health care intervention under the health extension program.<sup>27,28</sup> Most probably this is the first systematic review that synthesized information on women's development army and its contribution. Nine studies were assessed and all of them revealed women's development army has contributed enormously for the improved maternal and child health, and health service use. The evidences have shown that the benefit of WDAs was obtained through participation in the group,<sup>18,19</sup> closeness of the groups to health facilities<sup>20,21</sup> and their effective functioning.<sup>22-26</sup>

Women in a village level is expected to being a part and actively participate in to one-to-five connection under the WDGs. By doing so they can easily obtain information, care and support from the primary health care structure<sup>15,16</sup> Involving community members in health services brings about an improvement of health service use and health status of the community.<sup>10,29,30</sup> Poor participation of the mothers in WDGs was found protective for defaulting from immunization of their children. Those who were not members of WDGs are more than three times more likely to default from the service as compared to those included.<sup>18</sup> Community involvement in vaccination programs for children was found effective in many low and middle income countries.<sup>31,32</sup> Their involvement lets the community participate in decision making and improves their knowledge.<sup>33</sup>

Participation in WDGs in Ethiopia minimized maternal deaths. Women who are not members of WDGs are two times at risk of experiencing maternal death in the study area.<sup>19</sup> Participating community members has positive effect on mothers' survival.<sup>34</sup> More over the Ethiopian WDG involvement resulted in improved birth preparedness and complication readiness.<sup>22</sup> This implied that being a member of WDGs had enabled mothers to have knowledge on maternal health services and changed their attitude towards the use of the services so that they visited health institutions for maternal health services.

The other major issues regarding WDA's contribution to maternal health and health service use is distance from health facilities in reference to their meeting area. When the distance became beyond two kilometers from the nearest health center or hospital members were less likely to use



1  
2  
3 ANC and delivery service as compared to their counterparts.<sup>20,21</sup> Even if many national and  
4 international policy documents have given due concern for physical access to improve maternal  
5 health service use<sup>13,35,36</sup> still the problem prevails in many low and middle income countries.<sup>37-40</sup>  
6  
7 This concern is also experienced by WDGs in Ethiopia.  
8  
9

10 Although there are some information that revealed performance of WDGs doesn't have anything  
11 in improving maternal health service use,<sup>20,21</sup> there are an ample of evidence that showed  
12 effective functioning and well performing of these groups resulted in improved maternal health  
13 and health service use.<sup>22-26</sup> In the previous studies performance of the groups was measured with  
14 traditional way of performance measurement at the village level. The performance measurement  
15 ways, measurement indicators and evaluators may not be effective in measuring actual  
16 performance of the groups. Well performing WDGs facilitated the linkage between service  
17 mothers and the primary health care system as a result service utilization and acceptance were  
18 improved.<sup>23-25</sup> On top of this strongly established WDGs and their strong linkage with the  
19 primary health care system ease the health service practitioners especially HEWs effort to refer  
20 significant amount of women to give birth in health facilities.<sup>23</sup> Moreover these voluntary system  
21 is serving as an initiatives to reduce delays in maternal health services use.<sup>24</sup>  
22  
23  
24  
25  
26  
27  
28  
29  
30

31 Health Extension Workers (HEWs) are paid health workers at the community level. They are  
32 required to deliver health information and other health service packages to the community.<sup>41,42</sup>  
33 These health workers are using the WDA structure as a perfect strategy to share information and  
34 create linkage with the community members at the household and individual level.<sup>26</sup> By doing so  
35 they can deliver the services effectively.  
36  
37  
38  
39  
40

### 41 **Limitations of the Review**

42  
43 A potential limitation of the present review might be that we haven't conducted meta-analysis  
44 due to heterogeneous types of study designs and population included in this review. The other  
45 thing is that we have included only full text articles found free online.  
46  
47  
48

### 49 **Conclusions**

50  
51 The results from the review have indicated that even if the reason for existence of WDA system  
52 is to support HEWs for all the health extension packages, their intervention is limited only on  
53 maternal and child health service. Nevertheless, its contribution to maternal and child health  
54  
55  
56  
57  
58  
59  
60

1  
2  
3 service utilizations and mothers improved health is countless. Being member of a WDG and one-  
4 to-five connection under the group, has a positive effect on child immunization service use,  
5 minimizing maternal mortality, birth preparedness and complication readiness, skilled delivery,  
6 skilled ANC and minimizing delays to use maternal health service. Moreover, it was found an  
7 effective and efficient mechanism to share information to the community and create linkage  
8 between the communities with the primary health care system.  
9

### 14 **Implication for practice**

15  
16 The government is required to continue the existing achievements regarding WDA's contribution  
17 for maternal and child health services utilization. Again the responsible bodies in each structure  
18 in the Ethiopian health care system have to extend their intervention to health issues other than  
19 maternal and child health.  
20

21  
22 The responsible bodies in the Ethiopian Federal Ministry of Health have to prepare clear,  
23 objective and standardized performance measurement indicators for WDGs.  
24

25  
26 Since the distance of existing WDGs from health facilities is important determinant for maternal  
27 health service utilization, the government is supposed to establish new health facilities as near as  
28 possible to the population and organize the community living around health facilities into  
29 WDGs.  
30  
31

### 35 **Implications for research**

36  
37 Although there are some studies regarding WDA, still there is paucity of literatures regarding the  
38 issue. Therefore researchers are responsible to conduct various enquiries on the issue.  
39

40  
41 Moreover, researchers are supposed to examine WDA's contribution to other health issues in  
42 addition to maternal and child health service use.  
43

44  
45 **Funding statement:** This work was supported by the Alliance for Health Policy and Systems  
46 Research/WHO Geneva (Grant Number SRC – Ethiopia 2016/659070-0).  
47

48  
49 **A competing interest's statement:** The authors declare that they have no conflict of interest.  
50

51  
52 **Author Contributions:** KY and MS conceived the papers, and written protocol for the  
53 systematic review. KY and GA searched articles, extracted data, analyzed data, drafted the first  
54

1  
2  
3 version of this paper and finalized the final version. KY, GA and MS have written and revised  
4 the manuscript.  
5

6  
7  
8 **A patient consent form:** not required  
9

10  
11 **Data statement:** all relevant data are provided in the paper and supplementary files. Additional  
12 details can be provided by the contact author on request.  
13

14  
15 **Acknowledgements:** This review question was raised by Federal Ministry of Health, Ethiopia  
16  
17  
18  
19  
20  
21  
22  
23  
24  
25  
26  
27  
28  
29  
30  
31  
32  
33  
34  
35  
36  
37  
38  
39  
40  
41  
42  
43  
44  
45  
46  
47  
48  
49  
50  
51  
52  
53  
54  
55  
56  
57  
58  
59  
60

## References

1. Glenton C, Scheel IB, Pradhan S, Lewin S, Hodgins S, Shrestha V. The female community health volunteer programme in Nepal: Decision makers' perceptions of volunteerism, payment and other incentives. *Soc Sci Med*. 2010;70(12):1920-1927. doi:10.1016/j.socscimed.2010.02.034.
2. Hadi A. Management of acute respiratory infections by community health volunteers: Experience of Bangladesh Rural Advancement Committee (BRAC). *Bull World Health Organ*. 2003;81(3):183-189. doi:10.1016/S0140-6736(04)17312-1.
3. Lewin S, Munabi-Babigumira S, Glenton C, et al. Lay health workers in primary and community health care for maternal and child health and the management of infectious diseases. *Cochrane Database Syst Rev*. 2010;3(3):CD004015. doi:10.1002/14651858.CD004015.pub3.www.cochranelibrary.com.
4. Lewin S, Dick J, Pond P, et al. Lay health workers in primary and community health care. *Cochrane Database Syst Rev*. 2005;004015. doi:10.1002/14651858.CD004015.pub2.
5. Hsien M, Chung L, Hazmi H, Cheah WL. Role Performance of Community Health Volunteers and Its Associated Factors in Kuching District , Sarawak. *J Environ Public Health*. 2017;2017(9610928). <https://doi.org/10.1155/2017/9610928%0AResearch>.
6. Cueto M. The origins of primary health care and selective primary health care. *Am J Public Health*. 2004;94(11):1864-1874. doi:10.2105/AJPH.94.11.1864.
7. Kuule Y, Dobson AE, Woldeyohannes D, et al. Community Health Volunteers in Primary Healthcare in Rural Uganda: Factors Influencing Performance. *Front Public Heal*. 2017;5(March):1-8. doi:10.3389/fpubh.2017.00062.
8. Weidert K, Gessesew A, Bell S, Godefay H, Prata N. Community Health Workers as Social Marketers of Injectable Contraceptives: A Case Study from Ethiopia. *Glob Heal Sci Pract*. 2017;5(1):44-56. doi:10.9745/GHSP-D-16-00344.
9. Sudhakar M, Woldie M, Yitbarek K, Abamecha F, Tamirat A. Primary Care Systems Profiles and Performance (PRIMASYS): Ethiopian Case study. *Alliance Heal Policy Syst Res*. 2017. doi:10.1186/1478-4491-11-39.12.

10. Banteyerga H. Ethiopia ' s Health Extension Program: Improving Health through Community Involvement. *MEDICC Rev.* 2011;13(3):46-49.
11. Wang H, Tesfaye R, Ramana GN V, Chekagn CT. *Ethiopia Health Extension Program.* Publishing and Knowledge Division, The World Bank; 2016. doi:10.1596/978-1-4648-0815-9.
12. Selamu M, Asher L, Hanlon C, et al. Beyond the biomedical: Community resources for mental health care in rural Ethiopia. *PLoS One.* 2015;10(5):1-14. doi:10.1371/journal.pone.0126666.
13. Ethiopian Federal Minstry of Health. *Health Sector Transformation Plan (2015/16 - 2019/20).* Addis Ababa, Ethiopia; 2015. <https://searchworks.stanford.edu/view/11700944>.
14. Betemariam W, Damtew Z, Tesfaye C, Fesseha N, Karim AM. Effect of Ethiopia's Health Development Army on maternal and newborn health care practices: A multi-level cross-sectional analysis. *Ann Glob Heal.* 2017;83(1):24. doi:10.1016/j.aogh.2017.03.051.
15. Maes K, Closser S, Vorel E, Tesfaye Y. Using community health workers: Discipline and hierarchy in Ethiopia's women's development army Ethiopia's women's development army. *Ann Anthropol Pract.* 2015;39(1):42-57. doi:10.1111/napa.12064.
16. Maes K, Closser S, Vorel E, Tesfaye Y. A Women's Development Army: Narratives of Community Health Worker Investment and Empowerment in Rural Ethiopia. *Stud Comp Int Dev.* 2015;50(4):455-478. doi:10.1007/s12116-015-9197-z.
17. George AS, Mehra V, Scott K, Sriram V. Community participation in health systems research: A systematic review assessing the state of research, the nature of interventions involved and the features of engagement with communities. *PLoS One.* 2015;10(10):1-25. doi:10.1371/journal.pone.0141091.
18. Aregawi HG, Gebrehiwot TG, Abebe YG, Meles KG, Wuneh AD. Determinants of defaulting from completion of child immunization in Laelay Adiabo District, Tigray Region, Northern Ethiopia: A case-control study. *PLoS One.* 2017;12(9):1-13. doi:10.1371/journal.pone.0185533.
19. Godefay H, Byass P, Graham WJ, Kinsman J, Mulugeta A. Risk factors for maternal mortality in rural Tigray, Northern Ethiopia: A case-control study. *PLoS One.*

- 2015;10(12):1-12. doi:10.1371/journal.pone.0144975.
20. Negero MG, Mitike YB, Worku AG, Abota TL. Skilled delivery service utilization and its association with the establishment of Women's Health Development Army in Yeky district, South West Ethiopia: a multilevel analysis. *BMC Res Notes*. 2018;11(1):83. doi:10.1186/s13104-018-3140-0.
  21. Girmaye M, Berhan Y. Skilled Antenatal Care Service Utilization and Its Association with the Characteristics of Women's Health Development Team in Yeky District, South-West Ethiopia: A Multilevel Analysis. *Ethiop J Health Sci*. 2016;26:369-380. doi:10.4314/ejhs.v26i4.9.
  22. Zepre K, Kaba M. Birth preparedness and complication readiness among rural women of reproductive age in Abeshige district, Guraghe zone, SNNPR, Ethiopia. *Int J Womens Health*. 2017;9:11-21. doi:10.2147/IJWH.S111769.
  23. Jackson R, Hailemariam A. The role of health extension workers in linking pregnant women with health facilities for delivery in rural and pastoralist areas of Ethiopia. *Ethiop J Health Sci*. 2016;26(5):471. doi:10.4314/ejhs.v26i5.9.
  24. Jackson R, Tesfay FH, Gebrehiwot TG, Godefay H. Factors that hinder or enable maternal health strategies to reduce delays in rural and pastoralist areas in Ethiopia. *Trop Med Int Heal*. 2017;22(2):148-160. doi:10.1111/tmi.12818.
  25. Jackson R, Tesfay FH, Godefay H, Gebrehiwot TG. Health extension workers' and mothers' attitudes to maternal health service utilization and acceptance in Adwa Woreda, Tigray Region, Ethiopia. *PLoS One*. 2016;11(3):1-15. doi:10.1371/journal.pone.0150747.
  26. Kok MC, Kea AZ, Datiko DG, et al. A qualitative assessment of health extension workers' relationships with the community and health sector in Ethiopia: Opportunities for enhancing maternal health performance. *Hum Resour Health*. 2015;13(1):1-12. doi:10.1186/s12960-015-0077-4.
  27. Federal Democratic Republic of Ethiopia Ministry of Health. *Health Sector Development Program III (2005/6-2009/10)*. Addis Ababa, Ethiopia; 2005.
  28. Federal Democratic Republic of Ethiopia Ministry of Health. *Health Sector Development Program IV October 2010 Contents*. Addis Ababa, Ethiopia; 2010.

- 1  
2  
3 29. World Health Organization. Community involvement in health development: challenging  
4 health services, report of a WHO study group [meeting in Geneva from 11 to 18  
5 December 1989]. *WHO Tech Rep Ser.* 1991;(809):56 p.  
6  
7  
8  
9 30. Hitchcock JM. Providing health care: community agency involvement. *Bull Am Coll*  
10 *Nurse Midwives.* 1971;16(1):12-18. doi:10.1111/j.1542-2011.1971.tb00056.x.  
11  
12  
13 31. Suryadevara M, Bonville CA, Ferraioli F, Domachowske JB. Community-Centered  
14 Education Improves Vaccination Rates in Children From Low-Income Households.  
15 *Pediatrics.* 2013;132(2):319-325. doi:10.1542/peds.2012-3927.  
16  
17  
18 32. Kawakatsu Y, Tanaka J, Ogawa K, Ogendo K, Honda S. Effects of three interventions and  
19 determinants of full vaccination among children aged 12-59 months in Nyanza province,  
20 Kenya. *Public Health.* 2015;129(11):1530-1538. doi:10.1016/j.puhe.2015.07.008.  
21  
22  
23  
24 33. Saeterdal I, Lewin S, Austvoll-Dahlgren A, Glenton C, Munabi-Babigumira S.  
25 Interventions aimed at communities to inform and/or educate about early childhood  
26 vaccination. *Cochrane Database Syst Rev.* 2014;2014(11).  
27 doi:10.1002/14651858.CD010232.pub2.  
28  
29  
30  
31 34. Rai S, Misra P, Upadhyay R, Anand K, Kant S. Public health approach to address  
32 maternal mortality. *Indian J Public Health.* 2012;56(3):196. doi:10.4103/0019-  
33 557X.104231.  
34  
35  
36  
37 35. World Health Organization/United Nations Childrens Fund. WHO/UNICEF Joint  
38 statement: Home visits for the newborn child: a strategy to improve survival. *WHO Libr.*  
39 2009:1-8.  
40  
41  
42  
43 36. World Health Organization. *WHO Recommendations on Interventions to Improve Preterm*  
44 *Birth Outcomes.*; 2015.  
45  
46  
47 37. Keya KT, Rob U, Rahman MM, Bajracharya A, Bellows B. Distance, Transportation  
48 Cost, and Mode of Transport in the Utilization of Facility-Based Maternity Services:  
49 Evidence from Rural Bangladesh. *Int Q Community Health Educ.* 2014;35(1):37-51.  
50 doi:10.2190/IQ.35.1.d.  
51  
52  
53  
54 38. Gage AJ, Guirlène Calixte M. Effects of the physical accessibility of maternal health  
55 services on their use in rural Haiti. *Popul Stud (NY).* 2006;60(3):271-288.  
56  
57  
58  
59  
60

- 1  
2  
3 doi:10.1080/00324720600895934.  
4  
5  
6 39. Ebu NI, Gross J. Factors influencing access to antenatal services and delivery care in sub-  
7 Saharan Africa. *Afr J Midwifery Womens Health*. 2015;9(2):58-65.  
8  
9 doi:10.12968/ajmw.2015.9.2.58.  
10  
11 40. Keya KT, Rahman MM, Rob U, Bellows B. Distance travelled and cost of transport for  
12 use of facility-based maternity services in rural Bangladesh: a cross-sectional survey.  
13 *Lancet*. 2013;382:17. doi:10.1016/S0140-6736(13)62178-9.  
14  
15 41. Wakabi W. Extension workers drive Ethiopia's primary health care. *Lancet*.  
16 2008;372(9642):880. doi:10.1016/S0140-6736(08)61381-1.  
17  
18 42. World Health Organization, Global Health Workforce Alliance. Country Case Study:  
19 Ethiopia's human resources for health program. *Heal (San Fr)*. 2008:1-7.  
20  
21 43. Haile F, Yemane D, Gebreslassie A. Assessment of non-financial incentives for volunteer  
22 community health workers - the case of Wukro district, Tigray, Ethiopia. *Hum Resour or*  
23 *Heal*. 2014;12(54):1-7. <http://www.ncbi.nlm.nih.gov/pmc/articles/PMC4180263/>.  
24  
25 44. Banteyerga H. Boosting maternal health care seeking behavior in rural low income  
26 communities: A case study of West Gojam and South Wollo Zones in Amhara, Ethiopia.  
27 *Am J Heal Res*. 2014;2(6):378-386. doi:10.11648/j.ajhr.20140206.20.  
28  
29 45. Sako B, Leerlooijer JN, Lelisa A, et al. Exploring barriers and enablers for scaling up a  
30 community-based grain bank intervention for improved infant and young child feeding in  
31 Ethiopia: A qualitative process evaluation. *Matern Child Nutr*. 2017;(September):e12551.  
32  
33 doi:10.1111/mcn.12551.  
34  
35  
36  
37  
38  
39  
40  
41  
42  
43  
44  
45  
46  
47  
48  
49  
50  
51  
52  
53  
54  
55  
56  
57  
58  
59  
60



1  
2  
3  
4  
5  
6  
7  
8  
9  
10  
11  
12  
13  
14  
15  
16  
17  
18  
19  
20  
21  
22  
23  
24  
25  
26  
27  
28  
29  
30  
31  
32  
33  
34  
35  
36  
37  
38  
39  
40  
41  
42  
43  
44  
45  
46  
47  
48  
49  
50  
51  
52  
53  
54  
55  
56  
57  
58  
59  
60

Figure legend:

Figure 1: Literature search and screening

For peer review only

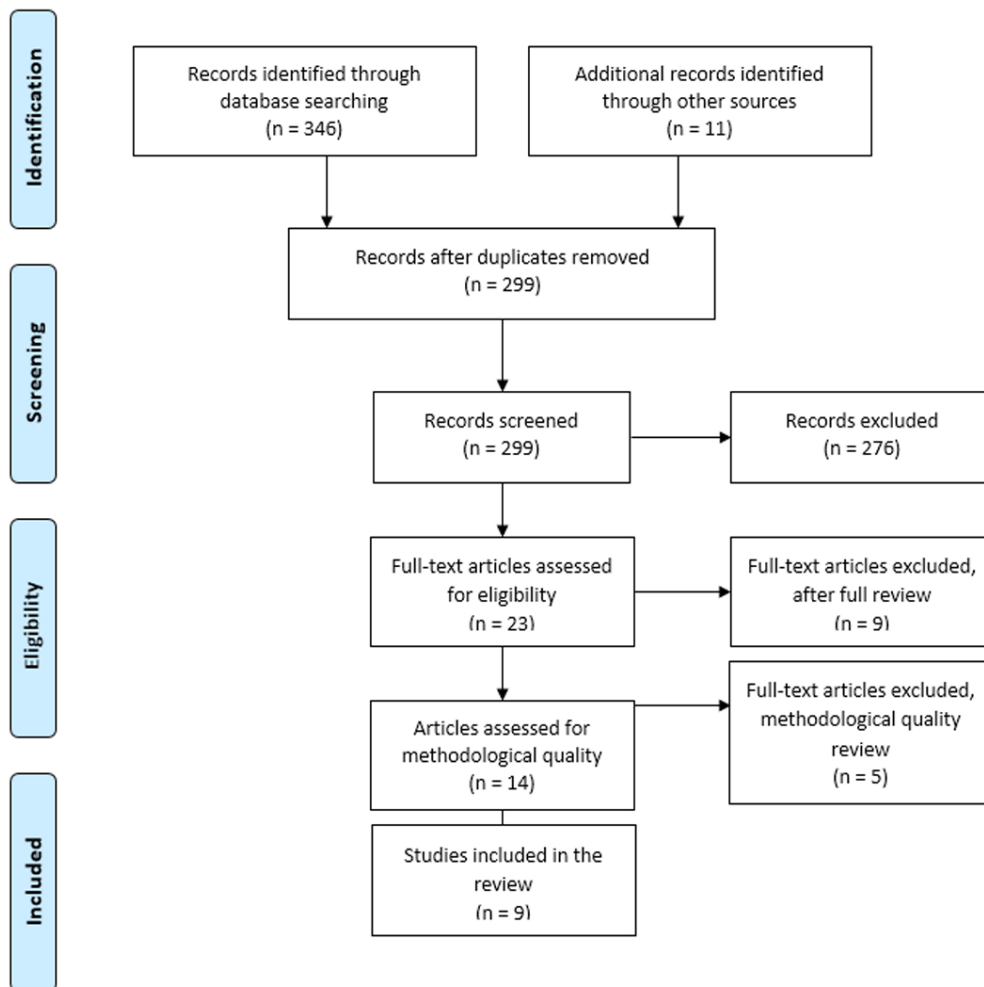

Literature search and screening

90x90mm (300 x 300 DPI)

**Supplementary file I: Search strategy**

| Search | Query                                                                                                                                                                                                   |
|--------|---------------------------------------------------------------------------------------------------------------------------------------------------------------------------------------------------------|
| #1     | Search (((((((community health workers) OR community volunteer) OR women's development army) OR women's development team) OR health development team) OR lay health workers) OR health development army |
| #2     | Search (((maternal health) OR maternal health service) OR child health) OR child health service) OR health                                                                                              |
| #3     | Search Ethiopia                                                                                                                                                                                         |
| #4     | #1 AND #2 AND #3                                                                                                                                                                                        |
| #5     | Limit to: Full text                                                                                                                                                                                     |
| #6     | Limit to: Publication date from 2010/01/01 to 2018/12/31                                                                                                                                                |
| #7     | Limit to: English language                                                                                                                                                                              |

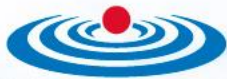

THE JOANNA BRIGGS INSTITUTE  
*Better evidence. Better outcomes.*

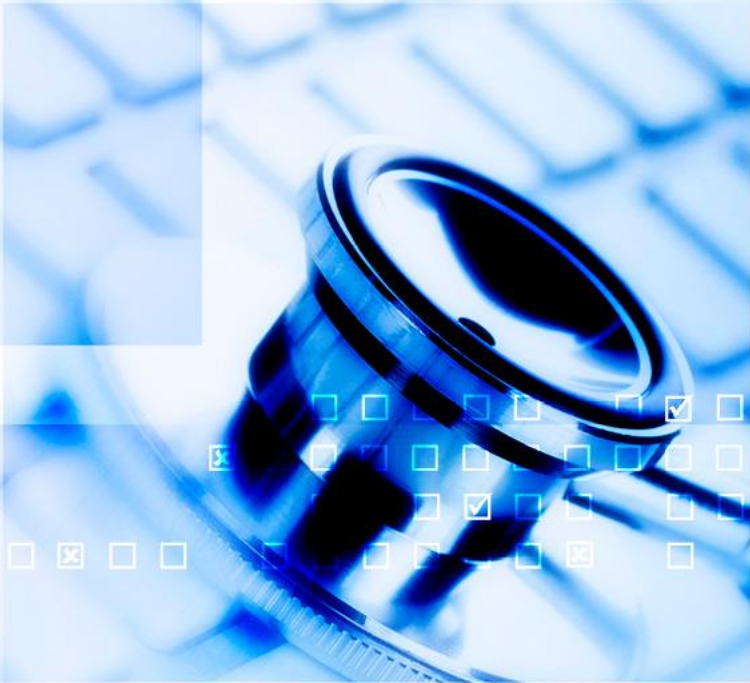

1  
2  
3  
4  
5  
6  
7  
8  
9  
10  
11  
12  
13  
14  
15  
16  
17  
18  
19  
20  
21  
22  
23  
24  
25  
26  
27  
28  
29  
30  
31  
32  
33  
34  
35  
36  
37  
38  
39  
40  
41  
42  
43  
44  
45  
46  
47  
48  
49  
50  
51  
52  
53  
54  
55  
56  
57  
58  
59  
60

The Joanna Briggs Institute Critical Appraisal tools  
for use in JBI Systematic Reviews

# Checklist for Analytical Cross Sectional Studies

<http://joannabriggs.org/research/critical-appraisal-tools.html>

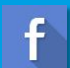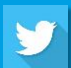

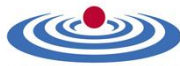

THE JOANNA BRIGGS INSTITUTE

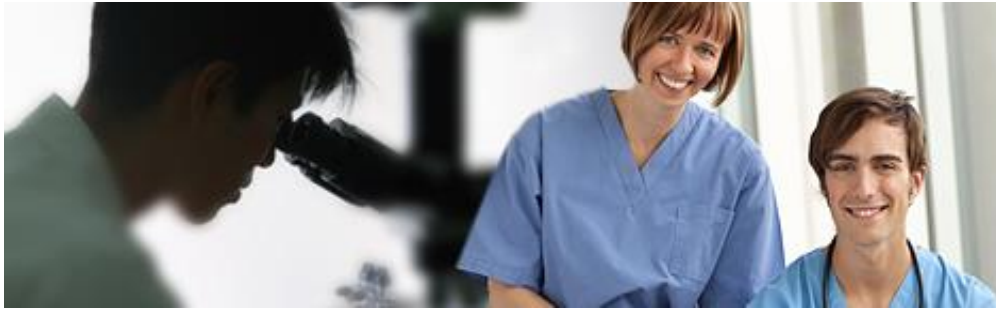

## The Joanna Briggs Institute

### Introduction

The Joanna Briggs Institute (JBI) is an international, membership based research and development organization within the Faculty of Health Sciences at the University of Adelaide. The Institute specializes in promoting and supporting evidence-based healthcare by providing access to resources for professionals in nursing, midwifery, medicine, and allied health. With over 80 collaborating centres and entities, servicing over 90 countries, the Institute is a recognized global leader in evidence-based healthcare.

### JBI Systematic Reviews

The core of evidence synthesis is the systematic review of literature of a particular intervention, condition or issue. The systematic review is essentially an analysis of the available literature (that is, evidence) and a judgment of the effectiveness or otherwise of a practice, involving a series of complex steps. The JBI takes a particular view on what counts as evidence and the methods utilized to synthesize those different types of evidence. In line with this broader view of evidence, the Institute has developed theories, methodologies and rigorous processes for the critical appraisal and synthesis of these diverse forms of evidence in order to aid in clinical decision-making in health care. There now exists JBI guidance for conducting reviews of effectiveness research, qualitative research, prevalence/incidence, etiology/risk, economic evaluations, text/opinion, diagnostic test accuracy, mixed-methods, umbrella reviews and scoping reviews. Further information regarding JBI systematic reviews can be found in the JBI Reviewer's Manual on our website.

### JBI Critical Appraisal Tools

All systematic reviews incorporate a process of critique or appraisal of the research evidence. The purpose of this appraisal is to assess the methodological quality of a study and to determine the extent to which a study has addressed the possibility of bias in its design, conduct and analysis. All papers selected for inclusion in the systematic review (that is – those that meet the inclusion criteria described in the protocol) need to be subjected to rigorous appraisal by two critical appraisers. The results of this appraisal can then be used to inform synthesis and interpretation of the results of the study. JBI Critical appraisal tools have been developed by the JBI and collaborators and approved by the JBI Scientific Committee following extensive peer review. Although designed for use in systematic reviews, JBI critical appraisal tools can also be used when creating Critically Appraised Topics (CAT), in journal clubs and as an educational tool.

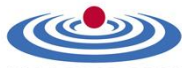

## JBI Critical Appraisal Checklist for Analytical Cross Sectional Studies

Reviewer \_\_\_\_\_ Date \_\_\_\_\_

Author \_\_\_\_\_ Year \_\_\_\_\_ Record Number \_\_\_\_\_

|                                                                             | Yes                      | No                       | Unclear                  | Not applicable           |
|-----------------------------------------------------------------------------|--------------------------|--------------------------|--------------------------|--------------------------|
| 1. Were the criteria for inclusion in the sample clearly defined?           | <input type="checkbox"/> | <input type="checkbox"/> | <input type="checkbox"/> | <input type="checkbox"/> |
| 2. Were the study subjects and the setting described in detail?             | <input type="checkbox"/> | <input type="checkbox"/> | <input type="checkbox"/> | <input type="checkbox"/> |
| 3. Was the exposure measured in a valid and reliable way?                   | <input type="checkbox"/> | <input type="checkbox"/> | <input type="checkbox"/> | <input type="checkbox"/> |
| 4. Were objective, standard criteria used for measurement of the condition? | <input type="checkbox"/> | <input type="checkbox"/> | <input type="checkbox"/> | <input type="checkbox"/> |
| 5. Were confounding factors identified?                                     | <input type="checkbox"/> | <input type="checkbox"/> | <input type="checkbox"/> | <input type="checkbox"/> |
| 6. Were strategies to deal with confounding factors stated?                 | <input type="checkbox"/> | <input type="checkbox"/> | <input type="checkbox"/> | <input type="checkbox"/> |
| 7. Were the outcomes measured in a valid and reliable way?                  | <input type="checkbox"/> | <input type="checkbox"/> | <input type="checkbox"/> | <input type="checkbox"/> |
| 8. Was appropriate statistical analysis used?                               | <input type="checkbox"/> | <input type="checkbox"/> | <input type="checkbox"/> | <input type="checkbox"/> |

Overall appraisal:    Include     Exclude     Seek further info

Comments (Including reason for exclusion)

---



---



---



## Explanation of analytical cross sectional studies critical appraisal

*How to cite:* Moola S, Munn Z, Tufanaru C, Aromataris E, Sears K, Sfetcu R, Currie M, Qureshi R, Mattis P, Lisy K, Mu P-F. Chapter 7: Systematic reviews of etiology and risk . In: Aromataris E, Munn Z (Editors). *Joanna Briggs Institute Reviewer's Manual*. The Joanna Briggs Institute, 2017. Available from <https://reviewersmanual.joannabriggs.org/>

### Analytical cross sectional studies Critical Appraisal Tool

Answers: Yes, No, Unclear or Not/Applicable

#### 1. Were the criteria for inclusion in the sample clearly defined?

The authors should provide clear inclusion and exclusion criteria that they developed prior to recruitment of the study participants. The inclusion/exclusion criteria should be specified (e.g., risk, stage of disease progression) with sufficient detail and all the necessary information critical to the study.

#### 2. Were the study subjects and the setting described in detail?

The study sample should be described in sufficient detail so that other researchers can determine if it is comparable to the population of interest to them. The authors should provide a clear description of the population from which the study participants were selected or recruited, including demographics, location, and time period.

#### 3. Was the exposure measured in a valid and reliable way?

The study should clearly describe the method of measurement of exposure. Assessing validity requires that a 'gold standard' is available to which the measure can be compared. The validity of exposure measurement usually relates to whether a current measure is appropriate or whether a measure of past exposure is needed.

Reliability refers to the processes included in an epidemiological study to check repeatability of measurements of the exposures. These usually include intra-observer reliability and inter-observer reliability.

#### 4. Were objective, standard criteria used for measurement of the condition?

It is useful to determine if patients were included in the study based on either a specified diagnosis or definition. This is more likely to decrease the risk of bias. Characteristics are another useful approach to matching groups, and studies that did not use specified diagnostic methods or definitions should provide evidence on matching by key characteristics.

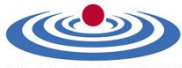

THE JOANNA BRIGGS INSTITUTE

1  
2  
3  
4  
5  
6  
7  
8  
9  
10  
11  
12  
13  
14  
15  
16  
17  
18  
19  
20  
21  
22  
23  
24  
25  
26  
27  
28  
29  
30  
31  
32  
33  
34  
35  
36  
37  
38  
39  
40  
41  
42  
43  
44  
45  
46  
47  
48  
49  
50  
51  
52  
53  
54  
55  
56  
57  
58  
59  
60

For peer review only





## 5. Were confounding factors identified?

Confounding has occurred where the estimated intervention exposure effect is biased by the presence of some difference between the comparison groups (apart from the exposure investigated/of interest). Typical confounders include baseline characteristics, prognostic factors, or concomitant exposures (e.g. smoking). A confounder is a difference between the comparison groups and it influences the direction of the study results. A high quality study at the level of cohort design will identify the potential confounders and measure them (where possible). This is difficult for studies where behavioral, attitudinal or lifestyle factors may impact on the results.

## 6. Were strategies to deal with confounding factors stated?

Strategies to deal with effects of confounding factors may be dealt within the study design or in data analysis. By matching or stratifying sampling of participants, effects of confounding factors can be adjusted for. When dealing with adjustment in data analysis, assess the statistics used in the study. Most will be some form of multivariate regression analysis to account for the confounding factors measured.

## 7. Were the outcomes measured in a valid and reliable way?

Read the methods section of the paper. If for e.g. lung cancer is assessed based on existing definitions or diagnostic criteria, then the answer to this question is likely to be yes. If lung cancer is assessed using observer reported, or self-reported scales, the risk of over- or under-reporting is increased, and objectivity is compromised. Importantly, determine if the measurement tools used were validated instruments as this has a significant impact on outcome assessment validity.

Having established the objectivity of the outcome measurement (e.g. lung cancer) instrument, it's important to establish how the measurement was conducted. Were those involved in collecting data trained or educated in the use of the instrument/s? (e.g. radiographers). If there was more than one data collector, were they similar in terms of level of education, clinical or research experience, or level of responsibility in the piece of research being appraised?

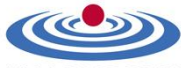

## 8. Was appropriate statistical analysis used?

As with any consideration of statistical analysis, consideration should be given to whether there was a more appropriate alternate statistical method that could have been used. The methods section should be detailed enough for reviewers to identify which analytical techniques were used (in particular, regression or stratification) and how specific confounders were measured.

For studies utilizing regression analysis, it is useful to identify if the study identified which variables were included and how they related to the outcome. If stratification was the analytical approach used, were the strata of analysis defined by the specified variables? Additionally, it is also important to assess the appropriateness of the analytical strategy in terms of the assumptions associated with the approach as differing methods of analysis are based on differing assumptions about the data and how it will respond.

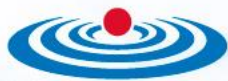

THE JOANNA BRIGGS INSTITUTE  
*Better evidence. Better outcomes.*

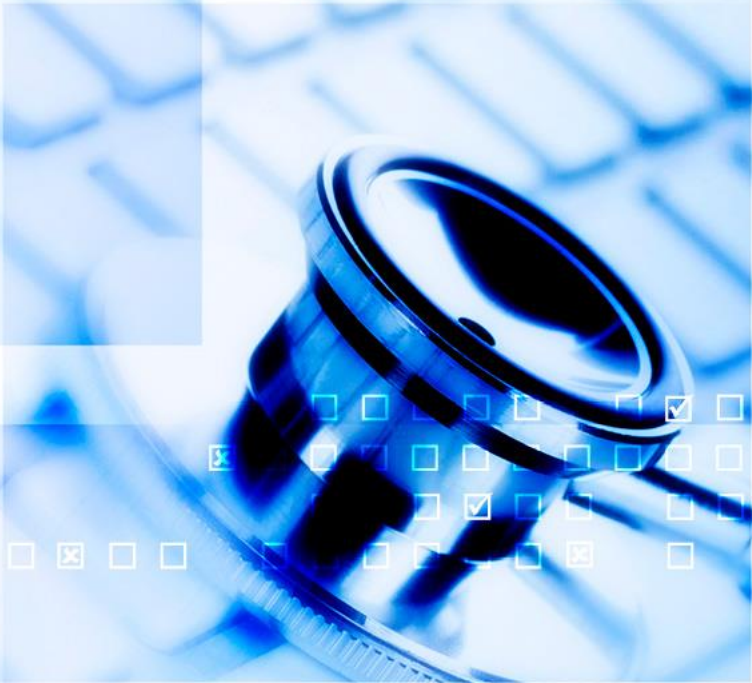

1  
2  
3  
4  
5  
6  
7  
8  
9  
10  
11  
12  
13  
14  
15  
16  
17  
18  
19  
20  
21  
22  
23  
24  
25  
26  
27  
28  
29  
30  
31  
32  
33  
34  
35  
36  
37  
38  
39  
40  
41  
42  
43  
44  
45  
46  
47  
48  
49  
50  
51  
52  
53  
54  
55  
56  
57  
58  
59  
60

The Joanna Briggs Institute Critical Appraisal tools  
for use in JBI Systematic Reviews

# Checklist for Case Control Studies

<http://joannabriggs.org/research/critical-appraisal-tools.html>

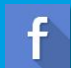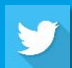



THE JOANNA BRIGGS INSTITUTE

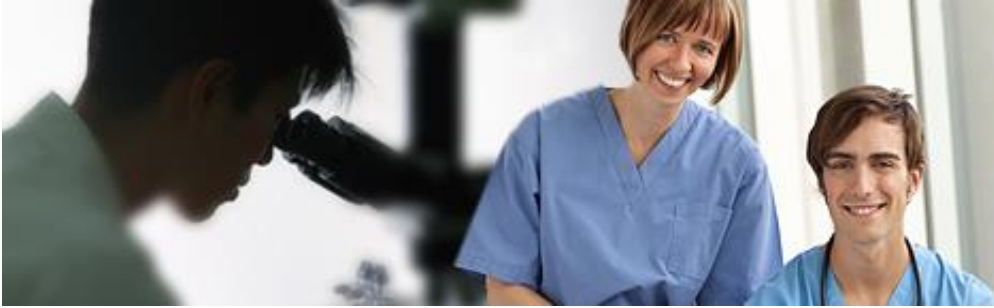

## The Joanna Briggs Institute

### Introduction

The Joanna Briggs Institute (JBI) is an international, membership based research and development organization within the Faculty of Health Sciences at the University of Adelaide. The Institute specializes in promoting and supporting evidence-based healthcare by providing access to resources for professionals in nursing, midwifery, medicine, and allied health. With over 80 collaborating centres and entities, servicing over 90 countries, the Institute is a recognized global leader in evidence-based healthcare.

### JBI Systematic Reviews

The core of evidence synthesis is the systematic review of literature of a particular intervention, condition or issue. The systematic review is essentially an analysis of the available literature (that is, evidence) and a judgment of the effectiveness or otherwise of a practice, involving a series of complex steps. The JBI takes a particular view on what counts as evidence and the methods utilized to synthesize those different types of evidence. In line with this broader view of evidence, the Institute has developed theories, methodologies and rigorous processes for the critical appraisal and synthesis of these diverse forms of evidence in order to aid in clinical decision-making in health care. There now exists JBI guidance for conducting reviews of effectiveness research, qualitative research, prevalence/incidence, etiology/risk, economic evaluations, text/opinion, diagnostic test accuracy, mixed-methods, umbrella reviews and scoping reviews. Further information regarding JBI systematic reviews can be found in the JBI Reviewer's Manual on our website.

### JBI Critical Appraisal Tools

All systematic reviews incorporate a process of critique or appraisal of the research evidence. The purpose of this appraisal is to assess the methodological quality of a study and to determine the extent to which a study has addressed the possibility of bias in its design, conduct and analysis. All papers selected for inclusion in the systematic review (that is – those that meet the inclusion criteria described in the protocol) need to be subjected to rigorous appraisal by two critical appraisers. The results of this appraisal can then be used to inform synthesis and interpretation of the results of the study. JBI Critical appraisal tools have been developed by the JBI and collaborators and approved by the JBI Scientific Committee following extensive peer review. Although designed for use in systematic reviews, JBI critical appraisal tools can also be used when creating Critically Appraised Topics (CAT), in journal clubs and as an educational tool.

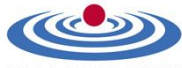

## JBI Critical Appraisal Checklist for Case Control Studies

Reviewer \_\_\_\_\_ Date \_\_\_\_\_

Author \_\_\_\_\_ Year \_\_\_\_\_ Record Number \_\_\_\_\_

|                                                                                                                  | Yes                      | No                       | Unclear                  | Not applicable           |
|------------------------------------------------------------------------------------------------------------------|--------------------------|--------------------------|--------------------------|--------------------------|
| 1. Were the groups comparable other than the presence of disease in cases or the absence of disease in controls? | <input type="checkbox"/> | <input type="checkbox"/> | <input type="checkbox"/> | <input type="checkbox"/> |
| 2. Were cases and controls matched appropriately?                                                                | <input type="checkbox"/> | <input type="checkbox"/> | <input type="checkbox"/> | <input type="checkbox"/> |
| 3. Were the same criteria used for identification of cases and controls?                                         | <input type="checkbox"/> | <input type="checkbox"/> | <input type="checkbox"/> | <input type="checkbox"/> |
| 4. Was exposure measured in a standard, valid and reliable way?                                                  | <input type="checkbox"/> | <input type="checkbox"/> | <input type="checkbox"/> | <input type="checkbox"/> |
| 5. Was exposure measured in the same way for cases and controls?                                                 | <input type="checkbox"/> | <input type="checkbox"/> | <input type="checkbox"/> | <input type="checkbox"/> |
| 6. Were confounding factors identified?                                                                          | <input type="checkbox"/> | <input type="checkbox"/> | <input type="checkbox"/> | <input type="checkbox"/> |
| 7. Were strategies to deal with confounding factors stated?                                                      | <input type="checkbox"/> | <input type="checkbox"/> | <input type="checkbox"/> | <input type="checkbox"/> |
| 8. Were outcomes assessed in a standard, valid and reliable way for cases and controls?                          | <input type="checkbox"/> | <input type="checkbox"/> | <input type="checkbox"/> | <input type="checkbox"/> |
| 9. Was the exposure period of interest long enough to be meaningful?                                             | <input type="checkbox"/> | <input type="checkbox"/> | <input type="checkbox"/> | <input type="checkbox"/> |
| 10. Was appropriate statistical analysis used?                                                                   | <input type="checkbox"/> | <input type="checkbox"/> | <input type="checkbox"/> | <input type="checkbox"/> |

Overall appraisal:    Include     Exclude     Seek further info

Comments (Including reason for exclusion)

---



---



---

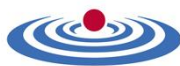

## Explanation of case control studies critical appraisal

*How to cite:* Moola S, Munn Z, Tufanaru C, Aromataris E, Sears K, Sfetcu R, Currie M, Qureshi R, Mattis P, Lisy K, Mu P-F. Chapter 7: Systematic reviews of etiology and risk . In: Aromataris E, Munn Z (Editors). *Joanna Briggs Institute Reviewer's Manual*. The Joanna Briggs Institute, 2017. Available from <https://reviewersmanual.joannabriggs.org/>

### Case Control Studies Critical Appraisal Tool

Answers: Yes, No, Unclear or Not/Applicable

#### 1. Were the groups comparable other than presence of disease in cases or absence of disease in controls?

The control group should be representative of the source population that produced the cases. This is usually done by individual matching; wherein controls are selected for each case on the basis of similarity with respect to certain characteristics other than the exposure of interest. Frequency or group matching is an alternative method. Selection bias may result if the groups are not comparable.

#### 2. Were cases and controls matched appropriately?

As in item 1, the study should include clear definitions of the source population. Sources from which cases and controls were recruited should be carefully looked at. For example, cancer registries may be used to recruit participants in a study examining risk factors for lung cancer, which typify population-based case control studies. Study participants may be selected from the target population, the source population, or from a pool of eligible participants (such as in hospital-based case control studies).

#### 3. Were the same criteria used for identification of cases and controls?

It is useful to determine if patients were included in the study based on either a specified diagnosis or definition. This is more likely to decrease the risk of bias. Characteristics are another useful approach to matching groups, and studies that did not use specified diagnostic methods or definitions should provide evidence on matching by key characteristics. A case should be defined clearly. It is also important that controls must fulfil all the eligibility criteria defined for the cases except for those relating to diagnosis of the disease.

#### 4. Was exposure measured in a standard, valid and reliable way?

The study should clearly describe the method of measurement of exposure. Assessing validity requires that a 'gold standard' is available to which the measure can be compared. The validity



of exposure measurement usually relates to whether a current measure is appropriate or whether a measure of past exposure is needed.

Case control studies may investigate many different 'exposures' that may or may not be associated with the condition. In these cases, reviewers should use the main exposure of interest for their review to answer this question when using this tool at the study level.

Reliability refers to the processes included in an epidemiological study to check repeatability of measurements of the exposures. These usually include intra-observer reliability and inter-observer reliability.

#### **5. Was exposure measured in the same way for cases and controls?**

As in item 4, the study should clearly describe the method of measurement of exposure. The exposure measures should be clearly defined and described in detail. Assessment of exposure or risk factors should have been carried out according to same procedures or protocols for both cases and controls.

#### **6. Were confounding factors identified?**

Confounding has occurred where the estimated intervention exposure effect is biased by the presence of some difference between the comparison groups (apart from the exposure investigated/of interest). Typical confounders include baseline characteristics, prognostic factors, or concomitant exposures (e.g. smoking). A confounder is a difference between the comparison groups and it influences the direction of the study results. A high quality study at the level of case control design will identify the potential confounders and measure them (where possible). This is difficult for studies where behavioral, attitudinal or lifestyle factors may impact on the results.

#### **7. Were strategies to deal with confounding factors stated?**

Strategies to deal with effects of confounding factors may be dealt within the study design or in data analysis. By matching or stratifying sampling of participants, effects of confounding factors can be adjusted for. When dealing with adjustment in data analysis, assess the statistics used in the study. Most will be some form of multivariate regression analysis to account for the confounding factors measured. Look out for a description of statistical methods as regression methods such as logistic regression are usually employed to deal with confounding factors/ variables of interest.

#### **8. Were outcomes assessed in a standard, valid and reliable way for cases and controls?**

Read the methods section of the paper. If for e.g. lung cancer is assessed based on existing definitions or diagnostic criteria, then the answer to this question is likely to be yes. If lung cancer is assessed using observer reported, or self-reported scales, the risk of over- or under-



1  
2  
3  
4 reporting is increased, and objectivity is compromised. Importantly, determine if the  
5 measurement tools used were validated instruments as this has a significant impact on  
6 outcome assessment validity.  
7  
8

9 Having established the objectivity of the outcome measurement (e.g. lung cancer) instrument,  
10 it's important to establish how the measurement was conducted. Were those involved in  
11 collecting data trained or educated in the use of the instrument/s? (e.g. radiographers). If  
12 there was more than one data collector, were they similar in terms of level of education,  
13 clinical or research experience, or level of responsibility in the piece of research being  
14 appraised?  
15  
16  
17  
18  
19

### 20 **9. Was the exposure period of interest long enough to be meaningful?**

21 It is particularly important in a case control study that the exposure time was sufficient enough  
22 to show an association between the exposure and the outcome. It may be that the exposure  
23 period may be too short or too long to influence the outcome.  
24  
25  
26  
27  
28

### 29 **10. Was appropriate statistical analysis used?**

30 As with any consideration of statistical analysis, consideration should be given to whether  
31 there was a more appropriate alternate statistical method that could have been used. The  
32 methods section should be detailed enough for reviewers to identify which analytical  
33 techniques were used (in particular, regression or stratification) and how specific confounders  
34 were measured.  
35  
36  
37

38 For studies utilizing regression analysis, it is useful to identify if the study identified which  
39 variables were included and how they related to the outcome. If stratification was the  
40 analytical approach used, were the strata of analysis defined by the specified variables?  
41 Additionally, it is also important to assess the appropriateness of the analytical strategy in  
42 terms of the assumptions associated with the approach as differing methods of analysis are  
43 based on differing assumptions about the data and how it will respond.  
44  
45  
46  
47  
48  
49  
50  
51  
52  
53  
54  
55  
56  
57  
58  
59  
60



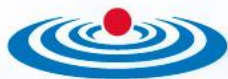

THE JOANNA BRIGGS INSTITUTE  
*Better evidence. Better outcomes.*



1  
2  
3  
4  
5  
6  
7  
8  
9  
10  
11  
12  
13  
14  
15  
16  
17  
18  
19  
20  
21  
22  
23  
24  
25  
26  
27  
28  
29  
30  
31  
32  
33  
34  
35  
36  
37  
38  
39  
40  
41  
42  
43  
44  
45  
46  
47  
48  
49  
50  
51  
52  
53  
54  
55  
56  
57  
58  
59  
60

The Joanna Briggs Institute Critical Appraisal tools  
for use in JBI Systematic Reviews

# Checklist for Qualitative Research

<http://joannabriggs.org/research/critical-appraisal-tools.html>

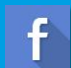



THE JOANNA BRIGGS INSTITUTE



## The Joanna Briggs Institute

### Introduction

The Joanna Briggs Institute (JBI) is an international, membership based research and development organization within the Faculty of Health Sciences at the University of Adelaide. The Institute specializes in promoting and supporting evidence-based healthcare by providing access to resources for professionals in nursing, midwifery, medicine, and allied health. With over 80 collaborating centres and entities, servicing over 90 countries, the Institute is a recognized global leader in evidence-based healthcare.

### JBI Systematic Reviews

The core of evidence synthesis is the systematic review of literature of a particular intervention, condition or issue. The systematic review is essentially an analysis of the available literature (that is, evidence) and a judgment of the effectiveness or otherwise of a practice, involving a series of complex steps. The JBI takes a particular view on what counts as evidence and the methods utilized to synthesize those different types of evidence. In line with this broader view of evidence, the Institute has developed theories, methodologies and rigorous processes for the critical appraisal and synthesis of these diverse forms of evidence in order to aid in clinical decision-making in health care. There now exists JBI guidance for conducting reviews of effectiveness research, qualitative research, prevalence/incidence, etiology/risk, economic evaluations, text/opinion, diagnostic test accuracy, mixed-methods, umbrella reviews and scoping reviews. Further information regarding JBI systematic reviews can be found in the JBI Reviewer's Manual on our website.

### JBI Critical Appraisal Tools

All systematic reviews incorporate a process of critique or appraisal of the research evidence. The purpose of this appraisal is to assess the methodological quality of a study and to determine the extent to which a study has addressed the possibility of bias in its design, conduct and analysis. All papers selected for inclusion in the systematic review (that is – those that meet the inclusion criteria described in the protocol) need to be subjected to rigorous appraisal by two critical appraisers. The results of this appraisal can then be used to inform synthesis and interpretation of the results of the study. JBI Critical appraisal tools have been developed by the JBI and collaborators and approved by the JBI Scientific Committee following extensive peer review. Although designed for use in systematic reviews, JBI critical appraisal tools can also be used when creating Critically Appraised Topics (CAT), in journal clubs and as an educational tool.

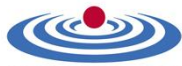

THE JOANNA BRIGGS INSTITUTE

## JBI Critical Appraisal Checklist for Qualitative Research

Reviewer \_\_\_\_\_ Date \_\_\_\_\_

Author \_\_\_\_\_ Year \_\_\_\_\_ Record Number \_\_\_\_\_

|                                                                                                                                                    | Yes                      | No                       | Unclear                  | Not applicable           |
|----------------------------------------------------------------------------------------------------------------------------------------------------|--------------------------|--------------------------|--------------------------|--------------------------|
| 1. Is there congruity between the stated philosophical perspective and the research methodology?                                                   | <input type="checkbox"/> | <input type="checkbox"/> | <input type="checkbox"/> | <input type="checkbox"/> |
| 2. Is there congruity between the research methodology and the research question or objectives?                                                    | <input type="checkbox"/> | <input type="checkbox"/> | <input type="checkbox"/> | <input type="checkbox"/> |
| 3. Is there congruity between the research methodology and the methods used to collect data?                                                       | <input type="checkbox"/> | <input type="checkbox"/> | <input type="checkbox"/> | <input type="checkbox"/> |
| 4. Is there congruity between the research methodology and the representation and analysis of data?                                                | <input type="checkbox"/> | <input type="checkbox"/> | <input type="checkbox"/> | <input type="checkbox"/> |
| 5. Is there congruity between the research methodology and the interpretation of results?                                                          | <input type="checkbox"/> | <input type="checkbox"/> | <input type="checkbox"/> | <input type="checkbox"/> |
| 6. Is there a statement locating the researcher culturally or theoretically?                                                                       | <input type="checkbox"/> | <input type="checkbox"/> | <input type="checkbox"/> | <input type="checkbox"/> |
| 7. Is the influence of the researcher on the research, and vice-versa, addressed?                                                                  | <input type="checkbox"/> | <input type="checkbox"/> | <input type="checkbox"/> | <input type="checkbox"/> |
| 8. Are participants, and their voices, adequately represented?                                                                                     | <input type="checkbox"/> | <input type="checkbox"/> | <input type="checkbox"/> | <input type="checkbox"/> |
| 9. Is the research ethical according to current criteria or, for recent studies, and is there evidence of ethical approval by an appropriate body? | <input type="checkbox"/> | <input type="checkbox"/> | <input type="checkbox"/> | <input type="checkbox"/> |
| 10. Do the conclusions drawn in the research report flow from the analysis, or interpretation, of the data?                                        | <input type="checkbox"/> | <input type="checkbox"/> | <input type="checkbox"/> | <input type="checkbox"/> |

Overall appraisal:      Include       Exclude       Seek further info

Comments (Including reason for exclusion)

---



---



---



## Discussion of Critical Appraisal Criteria

*How to cite:* Lockwood C, Munn Z, Porritt K. Qualitative research synthesis: methodological guidance for systematic reviewers utilizing meta-aggregation. *Int J Evid Based Healthc.* 2015;13(3):179–187.

### 1. Congruity between the stated philosophical perspective and the research methodology

Does the report clearly state the philosophical or theoretical premises on which the study is based? Does the report clearly state the methodological approach adopted on which the study is based? Is there congruence between the two? For example:

A report may state that the study adopted a critical perspective and participatory action research methodology was followed. Here there is congruence between a critical view (focusing on knowledge arising out of critique, action and reflection) and action research (an approach that focuses on firstly working with groups to reflect on issues or practices, then considering how they could be different; then acting to create a change; and finally identifying new knowledge arising out of the action taken). However, a report may state that the study adopted an interpretive perspective and used survey methodology. Here there is incongruence between an interpretive view (focusing on knowledge arising out of studying what phenomena mean to individuals or groups) and surveys (an approach that focuses on asking standard questions to a defined study population); a report may state that the study was qualitative or used qualitative methodology (such statements do not demonstrate rigour in design) or make no statement on philosophical orientation or methodology.

### 2. Congruity between the research methodology and the research question or objectives

Is the study methodology appropriate for addressing the research question? For example: A report may state that the research question was to seek understandings of the meaning of pain in a group of people with rheumatoid arthritis and that a phenomenological approach was taken. Here, there is congruity between this question and the methodology. A report may state that the research question was to establish the effects of counselling on the severity of pain experience and that an ethnographic approach was pursued. A question that tries to establish cause-and effect cannot be addressed by using an ethnographic approach (as ethnography sets out to develop understandings of cultural practices) and thus, this would be incongruent.



### 3. Congruity between the research methodology and the methods used to collect data

Are the data collection methods appropriate to the methodology? For example:

A report may state that the study pursued a phenomenological approach and data was collected through phenomenological interviews. There is congruence between the methodology and data collection; a report may state that the study pursued a phenomenological approach and data was collected through a postal questionnaire. There is incongruence between the methodology and data collection here as phenomenology seeks to elicit rich descriptions of the experience of a phenomena that cannot be achieved through seeking written responses to standardized questions.

### 4. Congruity between the research methodology and the representation and analysis of data

Are the data analyzed and represented in ways that are congruent with the stated methodological position? For example:

A report may state that the study pursued a phenomenological approach to explore people's experience of grief by asking participants to describe their experiences of grief. If the text generated from asking these questions is searched to establish the meaning of grief to participants, and the meanings of all participants are included in the report findings, then this represents congruity; the same report may, however, focus only on those meanings that were common to all participants and discard single reported meanings. This would not be appropriate in phenomenological work.

### 5. There is congruence between the research methodology and the interpretation of results

Are the results interpreted in ways that are appropriate to the methodology? For example:

A report may state that the study pursued a phenomenological approach to explore people's experience of facial disfigurement and the results are used to inform practitioners about accommodating individual differences in care. There is congruence between the methodology and this approach to interpretation; a report may state that the study pursued a phenomenological approach to explore people's experience of facial disfigurement and the results are used to generate practice checklists for assessment. There is incongruence between the methodology and this approach to interpretation as phenomenology seeks to understand the meaning of a phenomenon for the study participants and cannot be interpreted to suggest that this can be generalized to total populations to a degree where standardized assessments will have relevance across a population.



## 6. Locating the researcher culturally or theoretically

Are the beliefs and values, and their potential influence on the study declared? For example:

The researcher plays a substantial role in the qualitative research process and it is important, in appraising evidence that is generated in this way, to know the researcher's cultural and theoretical orientation. A high quality report will include a statement that clarifies this.

## 7. Influence of the researcher on the research, and vice-versa, is addressed

Is the potential for the researcher to influence the study and for the potential of the research process itself to influence the researcher and her/his interpretations acknowledged and addressed? For example:

Is the relationship between the researcher and the study participants addressed? Does the researcher critically examine her/his own role and potential influence during data collection? Is it reported how the researcher responded to events that arose during the study?

## 8. Representation of participants and their voices

Generally, reports should provide illustrations from the data to show the basis of their conclusions and to ensure that participants are represented in the report.

## 9. Ethical approval by an appropriate body

A statement on the ethical approval process followed should be in the report.

## 10. Relationship of conclusions to analysis, or interpretation of the data

This criterion concerns the relationship between the findings reported and the views or words of study participants. In appraising a paper, appraisers seek to satisfy themselves that the conclusions drawn by the research are based on the data collected; data being the text generated through observation, interviews or other processes.

1  
2  
3  
4  
5  
6  
7  
8  
9  
10  
11  
12  
13  
14  
15  
16  
17  
18  
19  
20  
21  
22  
23  
24  
25  
26  
27  
28  
29  
30  
31  
32  
33  
34  
35  
36  
37  
38  
39  
40  
41  
42  
43  
44  
45  
46  
47  
48  
49  
50  
51  
52  
53  
54  
55  
56  
57  
58  
59  
60

**Supplementary file III: Data extraction checklist**

Qualitative

| Study ID | Study Design | Population | Phenomenon of interest | Outcome | Remark |
|----------|--------------|------------|------------------------|---------|--------|
|          |              |            |                        |         |        |
|          |              |            |                        |         |        |
|          |              |            |                        |         |        |
|          |              |            |                        |         |        |
|          |              |            |                        |         |        |

Quantitative

| Study ID | Study Design | Population | Outcome | Result | Remark |
|----------|--------------|------------|---------|--------|--------|
|          |              |            |         |        |        |
|          |              |            |         |        |        |
|          |              |            |         |        |        |
|          |              |            |         |        |        |
|          |              |            |         |        |        |

### Supplementary file IV: Table of included studies

| Study                                               | Purpose                                                                                                                                                        | Study design    | Participants and sample size                                                                                                                                |
|-----------------------------------------------------|----------------------------------------------------------------------------------------------------------------------------------------------------------------|-----------------|-------------------------------------------------------------------------------------------------------------------------------------------------------------|
| Aregawi HG, Gebrehiwot TG et al, 2017 <sup>18</sup> | To identify the determinants of defaulting from child immunization completion among children aged 9-23 months in the Laelay Adiabo District, North Ethiopia.   | Case-control    | 270 children aged 9-23 months <ul style="list-style-type: none"> <li>• 90 cases and</li> <li>• 180 controls</li> </ul>                                      |
| Godefay H, Byass P et al, 2015 <sup>19</sup>        | To characterize individual risk factors for maternal mortality in Tigray, Ethiopia.                                                                            | Case-control    | The sample size was 310 <ul style="list-style-type: none"> <li>• 62 cases and</li> <li>• 248 controls</li> </ul> from six randomly-selected rural districts |
| Zepre K and Kaba M, 2017 <sup>22</sup>              | To assess the current BPCR practice and determine associated factors among rural women of reproductive age in Abeshige district, Guraghe zone, SNNPR, Ethiopia | Cross-sectional | 454 women who delivered within 12 months prior to this survey                                                                                               |
| Negero MG. et al, 2018 <sup>20</sup>                | To assess Skilled delivery service utilization and its association with the establishment of Women's Health Development army                                   | Cross-sectional | 748 reproductive-age women who gave birth in 1 year preceding the study in 380 clusters of WDA were included                                                |
| Girmaye M. and Berhan Y. <sup>21</sup>              | To assess Skilled ANC service utilization and its association with the establishment of                                                                        | Cross-sectional | 748 reproductive-age women who gave birth in 1 year preceding the study                                                                                     |



|                                                   | Women's Health Development army                                                                                                                                                           |             |                                                                                                                                                                                                                                            |
|---------------------------------------------------|-------------------------------------------------------------------------------------------------------------------------------------------------------------------------------------------|-------------|--------------------------------------------------------------------------------------------------------------------------------------------------------------------------------------------------------------------------------------------|
| Jackson R. and Hailemariam A., 2016 <sup>23</sup> | To examine the barriers and facilitators for HEWs as they refer women to mid-level health facilities for birth.                                                                           | Qualitative | 45 HEWs, 14 women extension workers (employed by Afar Pastoralist Development Association, Afar Region) and 11 other health workers from health centers, hospitals or health offices.                                                      |
| Jackson R. Tesfay FH. et al, 2017 <sup>24</sup>   | To document factors that hinder or enable strategies to reduce the first and second delays of the Three Delays in rural and pastoralist areas in Ethiopia                                 | Qualitative | A key informant study was conducted with 44 HEWs in Afar, SNNP, and Tigray Regions                                                                                                                                                         |
| Jackson R. Tesfay FH. et al, 2016 <sup>25</sup>   | To explored HEWs' and mother's attitudes to maternal health services in Adwa Woreda, Tigray Region.                                                                                       | Qualitative | 45 women were interviewed                                                                                                                                                                                                                  |
| Kok MC. et al., 2015 <sup>26</sup>                | To understand how relationships between HEWs, the community and health sector were shaped, in order to inform policy on optimizing HEW performance in providing maternal health services. | Qualitative | 14 FGDs with HEWs, women and men from the community and 44 semi-structured interviews with HEWs; key informants working in program management, health service delivery and supervision of HEWs; mothers; and traditional birth attendants. |

## Supplementary file V: Critical appraisal result

### Case control

| Studies                                | Q1 | Q2 | Q3 | Q4 | Q5 | Q6 | Q7 | Q8 | Q9 | Q10 | Total      |
|----------------------------------------|----|----|----|----|----|----|----|----|----|-----|------------|
| Aregawi HG. et al <sup>18</sup>        | U  | Y  | Y  | Y  | Y  | Y  | Y  | Y  | U  | Y   | 8 Y<br>2 U |
| Godefay H, Byass P et al <sup>19</sup> | U  | Y  | Y  | Y  | Y  | Y  | Y  | Y  | U  | Y   | 8 Y<br>2 U |

### Cross-sectional

| Studies                                | Q1 | Q2 | Q3 | Q4 | Q5 | Q6 | Q7 | Q8 | Total             |
|----------------------------------------|----|----|----|----|----|----|----|----|-------------------|
| Haile F. et al <sup>43</sup>           | Y  | Y  | N  | Y  | Y  | Y  | U  | Y  | 5 Y<br>2 N<br>1 U |
| Negero MG. et al <sup>20</sup>         | Y  | Y  | U  | Y  | Y  | Y  | Y  | Y  | 7 Y<br>1 U        |
| Zepre K. et al <sup>22</sup>           | Y  | Y  | Y  | Y  | Y  | Y  | U  | Y  | 7 Y<br>1 U        |
| Girmaye M. and Berhan Y. <sup>21</sup> | Y  | Y  | Y  | Y  | Y  | Y  | U  | Y  | 7 Y<br>1 U        |

### Qualitative

| Studies                     | Q1 | Q2 | Q3 | Q4 | Q5 | Q6 | Q7 | Q8 | Q9 | Q10 | Total             |
|-----------------------------|----|----|----|----|----|----|----|----|----|-----|-------------------|
| Banteyerga H. <sup>44</sup> | Y  | U  | Y  | Y  | Y  | N  | N  | Y  | N  | Y   | 6 Y<br>3 N<br>1 U |
| Maes K. et al <sup>15</sup> | U  | U  | U  | U  | U  | N  | N  | Y  | Y  | U   | 2 Y<br>2 N<br>6 U |
| Sako B. et al <sup>45</sup> | Y  | Y  | Y  | Y  | Y  | N  | N  | Y  | Y  | Y   | 8 Y<br>2 N        |

|                                                            |   |   |   |   |   |   |   |   |   |   |                   |
|------------------------------------------------------------|---|---|---|---|---|---|---|---|---|---|-------------------|
| Jackson R., Hailemariam A. et al. <sup>23</sup>            | U | Y | Y | Y | Y | N | N | Y | Y | Y | 7 Y<br>2 N<br>1 U |
| Jackson R., Tesfay FH., Gebrehiwot TG. et al <sup>24</sup> | Y | Y | Y | Y | Y | N | N | Y | Y | Y | 8 Y<br>2 N        |
| Jackson R., Tesfay FH., Godefay H. et al <sup>25</sup>     | Y | Y | Y | Y | Y | N | Y | Y | Y | Y | 9 Y<br>1 N        |
| Kok MC., Kea AZ. et al <sup>26</sup>                       | Y | Y | Y | Y | Y | N | N | Y | Y | Y | 8 Y<br>2 N        |
| Maesa K., Closser S. et al <sup>16</sup>                   | U | Y | Y | Y | Y | N | N | U | Y | Y | 6 Y<br>2 N<br>2 U |

Y: Yes; N: No; U: Unclear

# Reporting checklist for systematic review and meta-analysis.

Based on the PRISMA guidelines.

## Instructions to authors

Complete this checklist by entering the page numbers from your manuscript where readers will find each of the items listed below.

Your article may not currently address all the items on the checklist. Please modify your text to include the missing information. If you are certain that an item does not apply, please write "n/a" and provide a short explanation.

Upload your completed checklist as an extra file when you submit to a journal.

In your methods section, say that you used the PRISMA reporting guidelines, and cite them as:

Moher D, Liberati A, Tetzlaff J, Altman DG, The PRISMA Group. Preferred Reporting Items for Systematic Reviews and Meta-Analyses: The PRISMA Statement

|                           |                    | Reporting Item                                                                                                                                                                                                                                                                                             | Page Number |
|---------------------------|--------------------|------------------------------------------------------------------------------------------------------------------------------------------------------------------------------------------------------------------------------------------------------------------------------------------------------------|-------------|
|                           | <a href="#">#1</a> | Identify the report as a systematic review, meta-analysis, or both.                                                                                                                                                                                                                                        | 1           |
| Structured summary        | <a href="#">#2</a> | Provide a structured summary including, as applicable: background; objectives; data sources; study eligibility criteria, participants, and interventions; study appraisal and synthesis methods; results; limitations; conclusions and implications of key findings; systematic review registration number | 2           |
| Rationale                 | <a href="#">#3</a> | Describe the rationale for the review in the context of what is already known.                                                                                                                                                                                                                             | 4-5         |
| Objectives                | <a href="#">#4</a> | Provide an explicit statement of questions being addressed with reference to participants, interventions, comparisons, outcomes, and study design (PICOS).                                                                                                                                                 | 6           |
| Protocol and registration | <a href="#">#5</a> | Indicate if a review protocol exists, if and where it can be accessed (e.g., Web address) and, if available, provide registration information including the registration number.                                                                                                                           |             |

|    |                                    |                     |                                                                                                                                                                                                                                 |     |
|----|------------------------------------|---------------------|---------------------------------------------------------------------------------------------------------------------------------------------------------------------------------------------------------------------------------|-----|
| 1  | Eligibility criteria               | <a href="#">#6</a>  | Specify study characteristics (e.g., PICOS, length of follow-up) and report characteristics (e.g., years considered, language, publication status) used as criteria for eligibility, giving rational                            | 6   |
| 2  |                                    |                     |                                                                                                                                                                                                                                 |     |
| 3  |                                    |                     |                                                                                                                                                                                                                                 |     |
| 4  |                                    |                     |                                                                                                                                                                                                                                 |     |
| 5  |                                    |                     |                                                                                                                                                                                                                                 |     |
| 6  | Information sources                | <a href="#">#7</a>  | Describe all information sources in the search (e.g., databases with dates of coverage, contact with study authors to identify additional studies) and date last searched.                                                      | 6   |
| 7  |                                    |                     |                                                                                                                                                                                                                                 |     |
| 8  |                                    |                     |                                                                                                                                                                                                                                 |     |
| 9  |                                    |                     |                                                                                                                                                                                                                                 |     |
| 10 |                                    |                     |                                                                                                                                                                                                                                 |     |
| 11 | Search                             | <a href="#">#8</a>  | Present full electronic search strategy for at least one database, including any limits used, such that it could be repeated.                                                                                                   | 6   |
| 12 |                                    |                     |                                                                                                                                                                                                                                 |     |
| 13 |                                    |                     |                                                                                                                                                                                                                                 |     |
| 14 |                                    |                     |                                                                                                                                                                                                                                 |     |
| 15 | Study selection                    | <a href="#">#9</a>  | State the process for selecting studies (i.e., for screening, for determining eligibility, for inclusion in the systematic review, and, if applicable, for inclusion in the meta-analysis).                                     | 7-8 |
| 16 |                                    |                     |                                                                                                                                                                                                                                 |     |
| 17 |                                    |                     |                                                                                                                                                                                                                                 |     |
| 18 |                                    |                     |                                                                                                                                                                                                                                 |     |
| 19 |                                    |                     |                                                                                                                                                                                                                                 |     |
| 20 |                                    |                     |                                                                                                                                                                                                                                 |     |
| 21 | Data collection process            | <a href="#">#10</a> | Describe the method of data extraction from reports (e.g., piloted forms, independently by two reviewers) and any processes for obtaining and confirming data from investigators.                                               | 9   |
| 22 |                                    |                     |                                                                                                                                                                                                                                 |     |
| 23 |                                    |                     |                                                                                                                                                                                                                                 |     |
| 24 |                                    |                     |                                                                                                                                                                                                                                 |     |
| 25 |                                    |                     |                                                                                                                                                                                                                                 |     |
| 26 | Data items                         | <a href="#">#11</a> | List and define all variables for which data were sought (e.g., PICOS, funding sources), and any assumptions and simplifications made.                                                                                          |     |
| 27 |                                    |                     |                                                                                                                                                                                                                                 |     |
| 28 |                                    |                     |                                                                                                                                                                                                                                 |     |
| 29 |                                    |                     |                                                                                                                                                                                                                                 |     |
| 30 |                                    |                     |                                                                                                                                                                                                                                 |     |
| 31 | Risk of bias in individual studies | <a href="#">#12</a> | Describe methods used for assessing risk of bias in individual studies (including specification of whether this was done at the study or outcome level, or both), and how this information is to be used in any data synthesis. |     |
| 32 |                                    |                     |                                                                                                                                                                                                                                 |     |
| 33 |                                    |                     |                                                                                                                                                                                                                                 |     |
| 34 |                                    |                     |                                                                                                                                                                                                                                 |     |
| 35 |                                    |                     |                                                                                                                                                                                                                                 |     |
| 36 |                                    |                     |                                                                                                                                                                                                                                 |     |
| 37 |                                    |                     |                                                                                                                                                                                                                                 |     |
| 38 | Summary measures                   | <a href="#">#13</a> | State the principal summary measures (e.g., risk ratio, difference in means).                                                                                                                                                   |     |
| 39 |                                    |                     |                                                                                                                                                                                                                                 |     |
| 40 |                                    |                     |                                                                                                                                                                                                                                 |     |
| 41 |                                    |                     |                                                                                                                                                                                                                                 |     |
| 42 | Planned methods of analysis        | <a href="#">#14</a> | Describe the methods of handling data and combining results of studies, if done, including measures of consistency (e.g., I <sup>2</sup> ) for each meta-analysis.                                                              | 9   |
| 43 |                                    |                     |                                                                                                                                                                                                                                 |     |
| 44 |                                    |                     |                                                                                                                                                                                                                                 |     |
| 45 |                                    |                     |                                                                                                                                                                                                                                 |     |
| 46 |                                    |                     |                                                                                                                                                                                                                                 |     |
| 47 | Risk of bias across studies        | <a href="#">#15</a> | Specify any assessment of risk of bias that may affect the cumulative evidence (e.g., publication bias, selective reporting within studies).                                                                                    |     |
| 48 |                                    |                     |                                                                                                                                                                                                                                 |     |
| 49 |                                    |                     |                                                                                                                                                                                                                                 |     |
| 50 |                                    |                     |                                                                                                                                                                                                                                 |     |
| 51 |                                    |                     |                                                                                                                                                                                                                                 |     |
| 52 |                                    |                     |                                                                                                                                                                                                                                 |     |
| 53 | Additional analyses                | <a href="#">#16</a> | Describe methods of additional analyses (e.g., sensitivity or subgroup analyses, meta-regression), if done, indicating which were pre-specified.                                                                                |     |
| 54 |                                    |                     |                                                                                                                                                                                                                                 |     |
| 55 |                                    |                     |                                                                                                                                                                                                                                 |     |
| 56 |                                    |                     |                                                                                                                                                                                                                                 |     |
| 57 |                                    |                     |                                                                                                                                                                                                                                 |     |
| 58 | Study selection                    | <a href="#">#17</a> | Give numbers of studies screened, assessed for eligibility, and                                                                                                                                                                 | 7-8 |
| 59 |                                    |                     |                                                                                                                                                                                                                                 |     |
| 60 |                                    |                     |                                                                                                                                                                                                                                 |     |

included in the review, with reasons for exclusions at each stage, ideally with a flow diagram.

|    |                    |                                                                      |       |
|----|--------------------|----------------------------------------------------------------------|-------|
| 1  |                    |                                                                      |       |
| 2  |                    |                                                                      |       |
| 3  |                    |                                                                      |       |
| 4  | Study              | <a href="#">#18</a>                                                  | 10    |
| 5  | characteristics    | For each study, present characteristics for which data were          |       |
| 6  |                    | extracted (e.g., study size, PICOS, follow-up period) and provide    |       |
| 7  |                    | the citation.                                                        |       |
| 8  |                    |                                                                      |       |
| 9  | Risk of bias       | <a href="#">#19</a>                                                  |       |
| 10 | within studies     | Present data on risk of bias of each study and, if available, any    |       |
| 11 |                    | outcome-level assessment (see Item 12).                              |       |
| 12 |                    |                                                                      |       |
| 13 | Results of         | <a href="#">#20</a>                                                  | 10-14 |
| 14 | individual studies | For all outcomes considered (benefits and harms), present, for       |       |
| 15 |                    | each study: (a) simple summary data for each intervention group      |       |
| 16 |                    | and (b) effect estimates and confidence intervals, ideally with a    |       |
| 17 |                    | forest plot.                                                         |       |
| 18 |                    |                                                                      |       |
| 19 |                    |                                                                      |       |
| 20 | Synthesis of       | <a href="#">#21</a>                                                  | 10-14 |
| 21 | results            | Present the main results of the review. If meta-analyses are         |       |
| 22 |                    | done, include for each, confidence intervals and measures of         |       |
| 23 |                    | consistency.                                                         |       |
| 24 |                    |                                                                      |       |
| 25 | Risk of bias       | <a href="#">#22</a>                                                  |       |
| 26 | across studies     | Present results of any assessment of risk of bias across studies     |       |
| 27 |                    | (see Item 15).                                                       |       |
| 28 |                    |                                                                      |       |
| 29 | Additional         | <a href="#">#23</a>                                                  |       |
| 30 | analysis           | Give results of additional analyses, if done (e.g., sensitivity or   |       |
| 31 |                    | subgroup analyses, meta-regression [see Item 16]).                   |       |
| 32 |                    |                                                                      |       |
| 33 | Summary of         | <a href="#">#24</a>                                                  | 10-14 |
| 34 | Evidence           | Summarize the main findings, including the strength of evidence      |       |
| 35 |                    | for each main outcome; consider their relevance to key groups        |       |
| 36 |                    | (e.g., health care providers, users, and policy makers               |       |
| 37 |                    |                                                                      |       |
| 38 | Limitations        | <a href="#">#25</a>                                                  | 16    |
| 39 |                    | Discuss limitations at study and outcome level (e.g., risk of bias), |       |
| 40 |                    | and at review level (e.g., incomplete retrieval of identified        |       |
| 41 |                    | research, reporting bias).                                           |       |
| 42 |                    |                                                                      |       |
| 43 | Conclusions        | <a href="#">#26</a>                                                  | 15-16 |
| 44 |                    | Provide a general interpretation of the results in the context of    |       |
| 45 |                    | other evidence, and implications for future research.                |       |
| 46 |                    |                                                                      |       |
| 47 | Funding            | <a href="#">#27</a>                                                  | 17    |
| 48 |                    | Describe sources of funding or other support (e.g., supply of        |       |
| 49 |                    | data) for the systematic review; role of funders for the systematic  |       |
| 50 |                    | review.                                                              |       |
| 51 |                    |                                                                      |       |

The PRISMA checklist is distributed under the terms of the Creative Commons Attribution License CC-BY. This checklist can be completed online using <https://www.goodreports.org/>, a tool made by the [EQUATOR Network](#) in collaboration with [Penelope.ai](#)

# BMJ Open

## Contribution of women's development army to maternal and child health in Ethiopia: A systematic review of evidence

|                                 |                                                                                                                                                                                                                                                                                                                   |
|---------------------------------|-------------------------------------------------------------------------------------------------------------------------------------------------------------------------------------------------------------------------------------------------------------------------------------------------------------------|
| Journal:                        | <i>BMJ Open</i>                                                                                                                                                                                                                                                                                                   |
| Manuscript ID                   | bmjopen-2018-025937.R1                                                                                                                                                                                                                                                                                            |
| Article Type:                   | Research                                                                                                                                                                                                                                                                                                          |
| Date Submitted by the Author:   | 08-Nov-2018                                                                                                                                                                                                                                                                                                       |
| Complete List of Authors:       | Yitbarek, Kiddus; Jimma University, Health Policy and Management<br>Abraham, Gelila; Jimma University, Health Policy and Management<br>Sudhakar, Morankar ; Jimma University, Health behaviors and society;<br>Jimma University, Jimma University Rapid Review Response Center:<br>AHPSR/WHO Center of Excellence |
| <b>Primary Subject Heading</b>: | Health services research                                                                                                                                                                                                                                                                                          |
| Secondary Subject Heading:      | Public health, Health policy, Global health, Evidence based practice                                                                                                                                                                                                                                              |
| Keywords:                       | Women's development army, Maternal and child health, Ethiopia                                                                                                                                                                                                                                                     |
|                                 |                                                                                                                                                                                                                                                                                                                   |

SCHOLARONE™  
Manuscripts

1  
2  
3  
4 **Contribution of women's development army to maternal and child health in**  
5 **Ethiopia: A systematic review of evidence**  
6  
7

8 Kiddus Yitbarek<sup>1\*</sup> Gelila Abraham<sup>1</sup> Morankar Sudhakar<sup>2,3</sup>  
9

10 <sup>1</sup>Department of Health Policy and Management, Faculty of Public Health, Jimma University,  
11 Ethiopia, <sup>2</sup>Department of Health Behaviors and Society, Faculty of Public Health, Jimma  
12 University, Ethiopia, <sup>3</sup>The Ethiopian Evidenced Based Healthcare and Development Centre: A  
13 Joanna Briggs Institute Centre of Excellence  
14  
15  
16

17 \*Corresponding author  
18

19  
20 Email: [kiddus.yitbarek@ju.edu.et](mailto:kiddus.yitbarek@ju.edu.et) or [kiddus.yitbarek@yahoo.com](mailto:kiddus.yitbarek@yahoo.com)  
21

22 **Word count: 6083**  
23  
24  
25  
26  
27  
28  
29  
30  
31  
32  
33  
34  
35  
36  
37  
38  
39  
40  
41  
42  
43  
44  
45  
46  
47  
48  
49  
50  
51  
52  
53  
54  
55  
56  
57  
58  
59  
60



## Abstract

**Objective:** the aim of this review was to identify, appraise and synthesize studies that reported on the contribution of women's development army to maternal and child health development.

**Setting:** studies conducted in Ethiopia 2010 onwards and published in English were considered.

**Data Sources:** evidence were searched in MEDLINE, CINAHL, and EBSCOhost from 25 March to 10 April, 2018.

**Eligibility Criteria:** both quantitative and qualitative studies assessing the contribution of women's development army to maternal and child health.

**Data Extraction and Synthesis:** Two independent reviewers have extracted data using pre-planned data extraction tool separately for each study design. Findings were synthesized using tables and narrative summary.

**Outcome:** maternal and child health services; maternal and child mortality.

**Results:** nine studies met the inclusion criteria and used for synthesis. The results revealed that, participation and membership in women's development army has a positive effect on minimizing maternal death and improving child immunization service use. Skilled delivery and antenatal care service use were higher in women's development groups located within two kilometers radius of health facilities. These groups were also the main sources of information for mothers for birth preparedness and complication readiness. Moreover, well-established groups have strengthened the linkage of the health facility to the community so that, delays in maternal health service use were minimized; health extension workers could effectively refer women to a health facility for birth; and use of skilled birth service was improved.

**Conclusion:** voluntary health service intervention in Ethiopia has improved maternal and child health services' outcome. Decrease in maternal deaths, increase in antenatal and delivery service use and improved child immunization service uptake are attributable to this intervention. It is also effective and efficient mechanism to share information to the community linking the community members with the primary health care system.

**Keywords:** Women's development army, Maternal and child health, Ethiopia

## Article summary

### Strengths and limitations of this study

- The review has used two independent reviewers and additional reviewer who participated in resolving disagreements arise between the two reviewers.
- The review has used structured procedure during literature search, appraisal, data collection and synthesis
- Despite the strengths described above, we have not conducted meta-analysis due to heterogeneous types of study designs and population included in this review
- We have included only full text articles found free online

## Introduction

Evidence from various countries in the world disclosed that community volunteers' health service intervention has shown significant health impact.<sup>1,2</sup> They accomplish various functions related to health service delivery. In fact, usually they do not have formal professional or paraprofessional education and can be involved in voluntary care. They intervene in health care after attending job related trainings. These community health volunteers have different names in different settings for example, lay health workers, community health workers, and unpaid community volunteers.<sup>3,4</sup>

Community health volunteers have a great importance, especially in less developed countries, so as to overcome the increasing demand for health care services and the shortage of formal health care providers.<sup>5</sup> After Alma Ata declaration of Primary Health Care (PHC), community involvement in the health care was given due attention in order to improve wide access and acceptance of the services by service users and the community at large. It is believed that, problems cannot be solved from only the side of service providers and programmers. Moreover, it is a good strategy to mobilize resources relevant to health services.<sup>6-8</sup>

These health interventions using community volunteers have a sort of structure in some countries and unstructured in others.<sup>1,5</sup> Some nations linked the service under their PHC structure. Ethiopia is a good example of well-structured community health interventions. The primary health care unit (PHCU) is in the front line to PHC in the country. This system encompasses five satellite health posts (the lowest village-level health service facility) and a referral health center (HC). In the countries health care system, PHC is administered and the services facilitated in this point.<sup>9</sup> So as to address the deficit in human resources for health, Ethiopia launched the community health extension program (HEP) in 2004. It was implemented by establishing a health post and positioning two female health extension workers (HEWs) in every *kebele* (the smallest administrative division in Ethiopia). The HEP was launched to improve access to preventive, essential health services and to create a healthy environment. This program works to increase and sustain preventive health actions and health awareness. HEP has sixteen packages divided into four major categories.<sup>9-11</sup>

Six years after its introduction in 2010 a new innovative approach, Women's Development Army

1  
2  
3 (WDA) strategy was linked with HEP. This army has various development roles, from which  
4 health is the major one.<sup>9</sup> At the community level, members of the community linked with the PHC  
5 system through this strategy.<sup>12</sup> It was adopted based on the experience that using a network of the  
6 community health volunteers increased the efficiency of the HEWs in reaching households with  
7 actionable health messages. For a functional WDA, a team involving up to 30 households within  
8 the same neighborhood has to be developed. These teams are called Women's Development Teams  
9 (WDTs) A WDT again sub-divided into "one-to-five" connections, smaller groups of six members  
10 (households). Five households make up a single WDT.<sup>10,13,14</sup>  
11  
12  
13  
14  
15  
16  
17

18 This system has its own structural arrangement. The group's developmental works monitored in a  
19 meeting every two weeks by a command post formulated at the *kebele* level which is led by the  
20 *kebele* leader. Similar follow-up undertaken by the development group leaders to the one-to-five  
21 networks.<sup>9</sup> WDTs and the one-to-five networks leaders elected with full participation of the  
22 members. Their trust worthiness to the team members and being model family are being considered  
23 as criteria for selection. Model families recognized when they fully implement all the HEP  
24 packages or perform with distinction among the group members.<sup>15</sup>  
25  
26  
27  
28  
29  
30  
31

32 Health extension workers in collaboration with *kebele* administration and personnel from other  
33 developmental sectors (the agricultural and educational) facilitate the formation of the WDTs and  
34 the one-to-five networks. These unpaid health volunteers, WDT leaders, undertake various  
35 preventive and promotive health services in collaboration with HEWs. They carry out a number  
36 of tasks, including, support during health information delivery programs, keeping track of  
37 pregnancies and illnesses, helping during immunization campaigns, and transmitting messages  
38 between households and HEWs.<sup>9,10</sup>  
39  
40  
41  
42  
43  
44  
45

46 The Ethiopian unpaid community health intervention has its unique structural arrangement. It is  
47 included in various development sectors' strategic plan.<sup>13</sup> Some evidence claim that the program  
48 has variations in aims, goals, and experiences among various players included and suggests further  
49 researchers.<sup>16</sup>  
50  
51  
52  
53

54 This review aimed to assess the contribution of this structured community involvement in health  
55 service delivery. Finally, it came up with strong evidence to say the WDA structure has an impact  
56  
57

1  
2  
3 in the development of the country's maternal and child health. Moreover it has suggested a way to  
4 continue and/or extend the intervention for the future.  
5  
6

## 7 **Methods**

### 8 **Search Strategy**

9  
10  
11  
12 The search strategy targeted to find both published and unpublished studies. A step by step search  
13 strategy was utilized in this review. Primarily, major databases that comprise health system  
14 research including MEDLINE, CINAHL and EBSCOhost were utilized. Unpublished works were  
15 also searched from ProQuest Dissertations and Theses and Google Scholar. Afterwards, the  
16 reference list of all identified reports and articles were searched for additional studies. Key words  
17 initially used were: community health workers, community volunteer, women's development  
18 army, women's development group, women's development team, health development team, lay  
19 health workers, health development army, Ethiopia, maternal health, child health and maternal  
20 health services. Extracted references were downloaded and stored in Mendeley reference manager  
21 file. MEDLINE (on PubMed platform) search strategy is included in supplementary file I.  
22  
23  
24  
25  
26  
27  
28  
29

30 To guide the overall review, PRISMA flow diagram was used (Figure 1).<sup>17</sup> Starting from  
31 identification of records up to the inclusion of the relevant literatures for the review question were  
32 documented to comprehensive and accurate reporting.  
33  
34  
35

### 36 **Inclusion and exclusion criteria**

37  
38 Both quantitative and qualitative studies were included in this review regardless of their study  
39 design, given they included women in reproductive age group (14-49 years) and children less than  
40 five years of age for both sexes. To be considered the studies should have evaluated the effect of  
41 women's development army, and participation in the group on maternal mortality, maternal and  
42 child health service use. These are major intervention areas of WDAs regarding maternal and child  
43 health. Moreover, studies conducted in Ethiopia, 2010 (a year when WDA was introduced in  
44 Ethiopia) onwards and published in English language were considered for inclusion in this review.  
45 We have excluded narrative summaries, case reports and technical reports.  
46  
47  
48  
49  
50  
51

### 52 **Description of studies**

53  
54  
55 Eleven potentially relevant studies were found in addition to the three hundred fifty two studies  
56  
57  
58  
59  
60

1  
2  
3 identified in database searches. A total of 299 articles were eligible for primary examination after  
4 duplications were removed. On reviewing titles and abstracts against the review objectives and  
5 inclusion criteria, 276 studies were excluded. The full text of the remaining 23 studies was  
6 retrieved for detailed examination and 9 were excluded. Afterwards, 14 studies were assessed for  
7 methodological quality. The quality assessment was done by two independent reviewers for  
8 methodological validity prior to inclusion in the review using standardized critical appraisal  
9 instruments from the Joanna Briggs Institute.<sup>18–20</sup> Disagreements that arise between the reviewers  
10 was resolved through discussion, and with the participation of a third reviewer. After the appraisal  
11 five studies that did not meet the minimum requirements of methodological appraisal tools were  
12 excluded and nine were finally reviewed.

### 21 **Patient and Public Involvement**

22  
23 Patients and/or public were not involved in this review.

### 25 **Data collection**

26  
27 Two independent reviewers collected information relevant for the review. Before data collection  
28 all titles and abstracts of the searched literatures were assessed for potential relevance; and those  
29 records deemed not relevant were verified. Later on, full-text reports were assessed for eligibility.  
30 In the cases we fail to get articles free online, we tried to obtain full texts from research-gate<sup>21</sup>  
31 authors' pages and we obtained three. Reports that are co-publications or multiple reports of the  
32 same study were identified. The eligibility criteria were applied to all reports. Only evidence  
33 thoughtful of the review's eligibility criteria were included. Studies that fulfilled more than 70%  
34 of the critical appraisal check lists' requirements were selected to be included in the review  
35 (Supplementary file II).

36  
37 Data extraction was for quantitative and qualitative studies separately using pre designed  
38 checklists (Supplementary file III). The extracted data have included specific details about the  
39 interventions, populations, study methods and outcomes of significance to the review question and  
40 objectives (Supplementary file IV).

### 51 **Data synthesis and analysis**

52  
53 Findings from the included studies were synthesized using tables and a narrative summary. Meta-  
54 analysis was not possible since the included studies were heterogeneous in terms of the  
55

1  
2  
3 populations, methods and outcomes. We have categorized the results in to: participation in WDGs,  
4 distance of WDGs from health facility and effective functioning of WDGs.  
5  
6  
7  
8  
9  
10  
11  
12  
13  
14  
15  
16  
17  
18  
19  
20  
21  
22  
23  
24  
25  
26  
27  
28  
29  
30  
31  
32  
33  
34  
35  
36  
37  
38  
39  
40  
41  
42  
43  
44  
45  
46  
47  
48  
49  
50  
51  
52  
53  
54  
55  
56  
57  
58  
59  
60

For peer review only

## Results: Findings of the Review

We have included a total of nine studies, that meet the requirements of critical appraisal checklists, regardless of their study design. These studies met the critical appraisal requirements more than 70% (Supplementary file IV). The review comprised both observational and qualitative studies. The studies were conducted on various maternal and child health issues including child immunization, maternal mortality, birth preparedness and complication readiness (BPCR), skilled delivery, antenatal care (ANC), linking pregnant women with health facilities for delivery, delays on maternal health services and community relationships with health extension workers and health sector (Table 1).

Table 1: Characteristics of included studies for review

| Category                                  | Sub-category                                 | Frequency | Percentage (%) |
|-------------------------------------------|----------------------------------------------|-----------|----------------|
| Study design                              | Cross-sectional                              | 3         | 33.33          |
|                                           | Case-control                                 | 2         | 22.22          |
|                                           | Qualitative                                  | 4         | 44.44          |
| Year of publication                       | 2015                                         | 2         | 22.22          |
|                                           | 2016                                         | 3         | 33.33          |
|                                           | 2017                                         | 3         | 33.33          |
|                                           | 2018                                         | 1         | 11.11          |
| Addressed maternal and child health issue | Skilled maternal health service use          | 3         | 33.33          |
|                                           | Relationship of community with health sector | 3         | 33.33          |
|                                           | Child immunization                           | 1         | 11.11          |
|                                           | Maternal mortality                           | 1         | 11.11          |
|                                           | BPCR                                         | 1         | 11.11          |

## Narrative synthesis

### Participation in WDGs

In a study by Aregawi et al<sup>22</sup> 270 study subjects were included. From them 90 were defaulters from completion of child immunization (cases) and 180 were non defaulters (controls). 14 (15.6%) of cases and 89 (49.4%) of controls had satisfactory participation in WDGs. Result of statistical analysis showed that poor participation in women's developmental groups [AOR = 3.3,95%CI



1.54±7.08] is a determinant for defaulting immunization among children aged between 9 and 23 months.

A study by Godefay et al.<sup>23</sup> has included 310 study participants. Among them, 62 were dead mothers (cases) and 248 alive mothers (controls). From 62 died mothers 40 (64.5%) were members of WDTs and among 248 alive mothers 197 (79.4%) were members of WDTs. The statistical test revealed that women who were not members of the voluntary women's development army were more likely to experience maternal death [OR 2.07, 95%CI 1.04–4.11] (Table 2).

Table 2: Summary of evidence on the effect of participation in women's development group on maternal and child health service

| Author, year                                        | Target population                     | Study design | Outcome                                                               | Result                                                                                                     |
|-----------------------------------------------------|---------------------------------------|--------------|-----------------------------------------------------------------------|------------------------------------------------------------------------------------------------------------|
| Aregawi HG, Gebrehiwot TG et al, 2017 <sup>22</sup> | Children aged between 9 and 23 months | Case control | Default from immunization among children aged between 9 and 23 months | Poor participation in WDGs (AOR = 3.3, 95%CI 1.54±7.08) is a determinant for defaulting                    |
| Godefay H, Byass P et al, 2015 <sup>23</sup>        | Mothers in reproductive age group     | Case control | Maternal mortality                                                    | Women who were not members of WDG were more likely to experience maternal death (OR 2.07, 95%CI 1.04–4.11) |

### Distance of WDGs from health facility

In a study by Negero MG. et al<sup>24</sup> 748 reproductive-age women who gave birth in 1 year preceding the study in 380 clusters of WDA were included. 336 (45%) of women have received skilled delivery care and the remaining 412 have not received. A significant heterogeneity was observed between "Women's Development Teams (clusters)" for skilled delivery care service utilization which explains about 62% of the total variation. The distance of WDTs within 2 km radius from the nearest health facility was significantly associated [AOR (95% CI) 6.03 (1.92, 18.93)] with skilled delivery service utilization. The performance level of WDTs has no significant effect on

skilled delivery care service utilization. Best performing [AOR (95% CI) 2.14 (0.38, 12.27)] and good performing [AOR (95% CI) 4.38 (0.75, 25.56)].

Another cross-sectional study was conducted by Girmaye M. and Berhan Y.<sup>25</sup> which assessed 748 reproductive-age women who gave birth in 1 year preceding the study. 531 (71%) of the participants received skilled ANC service at least once. Similar to the above study, significant heterogeneity was observed between WDTs for skilled ANC utilization. Distance of WDA within 2 km radius from the nearest health facility was a significant predictor of skilled ANC service utilization [AOR=8.28; 95%CI, 1.08-62.20] (Table 3).

Table 3: Summary of evidence on the effect of women's development groups' distance from health facility on maternal health service

| Author, year                                    | Target population                                                   | Study design    | Outcome                              | Result                                                                                                                                                                    |
|-------------------------------------------------|---------------------------------------------------------------------|-----------------|--------------------------------------|---------------------------------------------------------------------------------------------------------------------------------------------------------------------------|
| Negero MG, Mitike YB, et al, 2018 <sup>24</sup> | Reproductive-age women who gave birth in 1 year preceding the study | Cross-sectional | Skilled delivery service utilization | The distance of WDTs within 2 km radius from the nearest health facility was significantly associated with skilled delivery service use [AOR (95% CI) 6.03 (1.92, 18.93)] |
| Girmaye M. and Berhan Y., 2016 <sup>25</sup>    | Reproductive-age women who gave birth in 1 year preceding the study | Cross-sectional | Skilled antenatal care utilization   | Distance of WDT within 2 km radius from the nearest health facility was significant predictor of skilled ANC service utilization [AOR=8.28; 95%CI, 1.08-62.20]            |

### Effective functioning of WDGs

A study by Zepre K. and Kaba M.<sup>26</sup> has assessed 454 women. 168 respondents were found to have prepared for birth and its complications and 286 were not. 30 (68.2%) of members and 134 (34.7%) of non-members of one-to-five connection were prepared for birth and its complication. The

1  
2  
3 statistical assessment showed that those who got information from their one-to-five connection are  
4 more likely to prepare for birth and its complications [OR 2.52, 95% CI 1.17, 5.39].  
5  
6

7 A study by Jackson R. and Hailemariam A.<sup>27</sup> has assessed the role of HEWs in linking pregnant  
8 women with health facilities for delivery. The target of the study were pregnant women. The result  
9 revealed that HEWs can effectively refer more women to give birth in health facilities when the  
10 WDA is well established.  
11  
12  
13

14 A study by Jackson R., Tesfay FH. et al<sup>28</sup> was aimed to document the factors that hinder or enable  
15 strategies to reduce the first and second delays of the three delays in rural and pastoralist areas in  
16 Ethiopia. The study concluded that, initiatives to reduce delays can improve access to maternal  
17 health services, especially when HEWs are supported by the WDA.  
18  
19  
20  
21

22 Another study conducted by Jackson R., Tesfay FH. et al<sup>29</sup> aimed at exploring health extension  
23 workers' and mothers' attitudes to maternal health service utilization and acceptance. And the result  
24 uncovered that, with the support of WDGs, HEWs have increased the rate of skilled birth  
25 attendance by calling ambulances to transport women to health centers either before their expected  
26 date of delivery (EDD) or when labor starts at home. These findings add to the growing body of  
27 evidence that health workers at the community level can work with women's groups to improve  
28 maternal health, thus reducing the need for emergency obstetric care in low-income countries.  
29  
30  
31  
32  
33

34 A study by Kok MC. et al.<sup>30</sup> has addressed health extension workers' relationships with the  
35 community and health sector in Ethiopia: opportunities for enhancing maternal health  
36 performance. This assessment found that the WDA supported HEWs in liaising with community  
37 members (Table 4).  
38  
39  
40  
41

42 Table 4: Summary of evidence in the effect of women's development army's effective functioning  
43 on maternal health services  
44

| 45<br>46<br>47<br>48                   | <b>Author, year</b>                    | <b>Target population</b> | <b>Study design</b> | <b>Outcome</b>                                | <b>Result</b>                                                                                             |
|----------------------------------------|----------------------------------------|--------------------------|---------------------|-----------------------------------------------|-----------------------------------------------------------------------------------------------------------|
| 49<br>50<br>51<br>52<br>53<br>54<br>55 | Zepre K and Kaba M, 2017 <sup>26</sup> | Pregnant women           | Cross-sectional     | Birth preparedness and complication readiness | Those who got information from their one-to-five connections are more likely to prepare for birth and its |

|                                                   |                  |             |                                                            |                                                                                                                             |
|---------------------------------------------------|------------------|-------------|------------------------------------------------------------|-----------------------------------------------------------------------------------------------------------------------------|
|                                                   |                  |             |                                                            | complications (OR 2.52, 95%CI 1.17, 5.39)                                                                                   |
| Jackson R. and Hailemariam A., 2016 <sup>27</sup> | Pregnant women   | Qualitative | Linking pregnant women with health facilities for delivery | HEWs can effectively refer more women to give birth in health facilities when the WDA is well established.                  |
| Jackson R., Tesfay FH. et al, 2017 <sup>28</sup>  | Pregnant women   | Qualitative | Delays in maternal health service use                      | Initiatives to reduce delays can improve access to maternal health services, especially when HEWs are supported by the WDA. |
| Jackson R., Tesfay FH. et al, 2016 <sup>29</sup>  | Mothers and HEWs | Qualitative | Maternal health service utilization and acceptance         | With the support of WDGs, HEWs have increased the rate of skilled birth attendance                                          |
| Kok MC., Kea AZ; et al., 2015 <sup>30</sup>       | Mothers and HEWs | Qualitative | Relationship of community with HEWs and Health sector      | The WAD supported HEWs in liaising with community members                                                                   |

## Discussion

The main objective of this systematic review was to identify, appraise and synthesize studies that reported on the contribution of Ethiopian innovative women's voluntary health intervention's (women's development army's) contribution to maternal and child health development. The major activity of this structure is supporting the primary health care intervention under the health extension program.<sup>31,32</sup> Most probably this is the first systematic review that synthesized information on women's development army and its contribution. Nine studies were assessed and all of them revealed women's development army has contributed for the improved maternal and child health, and health service use. The evidence have shown that the benefit of WDAs was obtained through participation in the group,<sup>22,23</sup> closeness of the groups to health facilities<sup>24,25</sup> and their effective functioning.<sup>26-30</sup>

Despite the fact that Ethiopian female community health intervention has special features, unpaid community health intervention has been used in various countries to improve population's health.<sup>14</sup> As various findings indicated it is a cost effective measure, especially for low income countries with low access to health services. They applied this strategy to curbe the disastrous shortfalls in the health workforce and to improve community ownership.<sup>33-36</sup>

Women in a village level are expected to be a part and actively participate in to one-to-five connection under the WDGs. By doing so they can easily obtain information, care and support from the primary health care structure.<sup>15,16</sup> Involving community members in health services brings about an improvement of health service use and health status of the community.<sup>10,37,38</sup> Good participation of mothers in WDGs was found protective for defaulting from child immunization . Those who were not members of WDGs are more than three times more likely to default from the service as compared to those included.<sup>22</sup> Community involvement in vaccination programs for children was found effective in many low and middle income countries.<sup>39,40</sup> For example, two systematic reviews focused on low income population revealed, participation of community health workers has improved child immunization.<sup>41,42</sup> Their involvement lets the community participate in decision making and improves their knowledge, so that ownership improved.<sup>43</sup>

Participation in WDGs in Ethiopia minimized maternal deaths. Women who are not members of WDGs are two times at risk of experiencing maternal death in the study area.<sup>23</sup> Participating community members has positive effect on mothers' survival.<sup>44</sup> Moreover the Ethiopian WDG

1  
2  
3 involvement resulted in improved birth preparedness and complication readiness.<sup>26</sup> Community  
4 health participation in India has also significantly minimized maternal death.<sup>45</sup> This implied those  
5 who took part in promoting health with WDGs could improve their health literacy and developed  
6 a good attitude towards the use of maternal health services.  
7  
8  
9

10 The other major issues regarding WDA's contribution to maternal health and health service use is  
11 distance from health facilities in reference to their meeting area. When the distance became beyond  
12 two kilometers from the nearest health center or hospital, members were less likely to use ANC  
13 and delivery service as compared to their counterparts.<sup>24,25</sup> As the meeting area of WDGs became  
14 nearer to health facilities, HEWs and health professionals from health facility can easily supervise  
15 and support the members during their meeting. Even if many national and international policy  
16 documents have given due concern for physical access to improve maternal health service  
17 use,<sup>13,46,47</sup> still the problem prevails in many low and middle income countries.<sup>48-51</sup> This concern  
18 is also experienced by WDGs in Ethiopia.  
19  
20  
21  
22  
23  
24  
25

26 Although there are some information that revealed performance of WDGs does not have anything  
27 in improving maternal health service use,<sup>24,25</sup> there are an ample of evidence that showed effective  
28 functioning and well performing of these groups resulted in improved maternal health and health  
29 service use.<sup>26-30</sup> In the previous studies, performance of the groups was measured by traditional  
30 ways of performance measurement at the village level. The performance measurement ways,  
31 measurement indicators and evaluators may not be effective in measuring actual performance of  
32 the groups. Other evidence revealed that, well performing WDGs facilitated the linkage between  
33 mothers and the primary health care system. As a result, service utilization and acceptance were  
34 improved.<sup>27-29</sup> Although the performance measurement ways differ in diverse settings, good  
35 performing community health interventions succeeded in improving maternal and child health  
36 development in low income countries.<sup>52-54</sup> As a result countries tend to improve the performance  
37 of their community health practitioners.<sup>55,56</sup>  
38  
39  
40  
41  
42  
43  
44  
45  
46  
47

48 On top of this, strongly operating WDGs and their strong linkage with the primary health care  
49 system ease the health service practitioners, especially HEWs effort to refer significant amount of  
50 women to give birth in health facilities.<sup>27</sup> HEWs are required to deliver health information and  
51 other health service packages to the community.<sup>57,58</sup> These health workers are using the WDA  
52 structure as a perfect strategy to share information and create linkage with the community members  
53  
54  
55  
56  
57  
58  
59  
60

1  
2  
3 at the household and individual level.<sup>30</sup> By doing so they could deliver the services effectively.  
4 Moreover, this voluntary system is serving as an initiative to reduce delays in maternal health  
5 services use.<sup>28</sup>  
6  
7

8  
9 The other best indicators of the contribution of WDA to maternal and child health are consecutive  
10 demographic and health surveys carried out in Ethiopia. For instance, maternal death was 673 in  
11 2005 and 676 in 2011 per 100 000 live births. But it became 412 in 2016, just it is 6 years after the  
12 introduction of WDA in Ethiopia. Under 5 mortality was also decreased from 88 in 2011 to 67 in  
13 2016. Maternal health services have shown a massive increase during these points as compared to  
14 prior years. ANC increased from 28% in 2005 to 34% in 2011 and 62% in 2016. Institutional  
15 delivery increased from 5% in 2005 to 10% in 2011 and 26% in 2016. Postnatal care (PNC) was  
16 also increased from 5% in 2005 to 8% in 2011, and 17% in 2016.<sup>59-62</sup> These figures indicated that  
17 there is an impressive improvements in maternal and child health after the introduction of WDA  
18 in the country. Even though we can not hide the contribution of other interventions for the  
19 accievents, WDA's contribution has accelerated the improvements in various maternal and child  
20 health indicators.  
21  
22  
23  
24  
25  
26  
27  
28  
29

### 30 **Limitations of the Review**

31  
32 A potential limitation of the present review might be, we have not conducted meta-analysis due to  
33 heterogeneous types of study designs and population included in this review. The other thing is  
34 that we have included only full text articles found free online.  
35  
36  
37

### 38 **Conclusions**

39  
40 The results from the review have indicated that even if the reason for the existence of WDA system  
41 is to support HEWs for all the health extension packages, their intervention is limited only to  
42 maternal and child health service. Nevertheless, its contribution to maternal and child health  
43 service utilizations and mothers improved health is countless. Being a member of a WDG and one-  
44 to-five connection under the group, has a positive effect on child immunization service use,  
45 minimizing maternal mortality, birth preparedness and complication readiness, skilled delivery,  
46 skilled ANC and minimizing delays to use maternal health service. Moreover, it was found an  
47 effective and efficient mechanism to share information to the community as well as to create links  
48 between the communities and the primary health care system.  
49  
50  
51  
52  
53  
54  
55  
56  
57  
58  
59  
60

### **Implication for practice**

The government is required to continue the existing achievements regarding WDA's contribution for maternal and child health services utilization. Again responsible bodies at each level in the structure of Ethiopian health care system have to extend the benefits from WDA to other health issues in addition to the maternal and child health.

The responsible bodies in the Ethiopian Federal Ministry of Health have to prepare clear, objective and standardized performance measurement indicators for WDGs.

Since the distance of existing WDGs from health facilities is an important determinant for maternal health service utilization, the government is supposed to establish new health facilities as near as possible to the population and organize the community living around health facilities into WDGs. Moreover, HEWs and health professionals from health facilities are expected to support and supervise WDGs far away from health facilities.

### **Implications for research**

Although there are some studies regarding WDA, still there is a paucity of literatures. Therefore, researchers are responsible to conduct various inquiries on the issue.

Moreover, researchers are supposed to examine the WDA's contribution to other health issues in addition to maternal and child health service use.

**Funding statement:** This work was supported by the Alliance for Health Policy and Systems Research/WHO Geneva (Grant Number SRC – Ethiopia 2016/659070-0).

**A competing interest's statement:** The authors declare that they have no conflict of interest.

**Author Contributions:** KY and MS conceived the papers, and written protocol for the systematic review. KY and GA searched articles, extracted data, analyzed data, drafted the first version of this paper and finalized the final version. KY, GA and MS have written and revised the manuscript.

**A patient consent form:** not required

**Data statement:** all relevant data are provided in the paper and supplementary files. Additional details can be provided by the contact author on request.



1  
2  
3 **Acknowledgements:** This review question was raised by Federal Ministry of Health, Ethiopia  
4  
5  
6  
7  
8  
9  
10  
11  
12  
13  
14  
15  
16  
17  
18  
19  
20  
21  
22  
23  
24  
25  
26  
27  
28  
29  
30  
31  
32  
33  
34  
35  
36  
37  
38  
39  
40  
41  
42  
43  
44  
45  
46  
47  
48  
49  
50  
51  
52  
53  
54  
55  
56  
57  
58  
59  
60

For peer review only

## References

1. Glenton C, Scheel IB, Pradhan S, Lewin S, Hodgins S, Shrestha V. The female community health volunteer programme in Nepal: Decision makers' perceptions of volunteerism, payment and other incentives. *Soc Sci Med.* 2010;70(12):1920-1927. doi:10.1016/j.socscimed.2010.02.034.
2. Hadi A. Management of acute respiratory infections by community health volunteers: Experience of Bangladesh Rural Advancement Committee (BRAC). *Bull World Health Organ.* 2003;81(3):183-189. doi:10.1016/S0140-6736(04)17312-1.
3. Lewin S, Munabi-Babigumira S, Glenton C, et al. Lay health workers in primary and community health care for maternal and child health and the management of infectious diseases. *Cochrane Database Syst Rev.* 2010;3(3):CD004015. doi:10.1002/14651858.CD004015.pub3.
4. Lewin S, Dick J, Pond P, et al. Lay health workers in primary and community health care. *Cochrane Database Syst Rev.* 2005;004015. doi:10.1002/14651858.CD004015.pub2.
5. Hsien M, Chung L, Hazmi H, Cheah WL. Role Performance of Community Health Volunteers and Its Associated Factors in Kuching District , Sarawak. *J Environ Public Health.* 2017;2017(9610928). <https://doi.org/10.1155/2017/9610928%0AResearch>.
6. Cueto M. The origins of primary health care and selective primary health care. *Am J Public Health.* 2004;94(11):1864-1874. doi:10.2105/AJPH.94.11.1864.
7. Kuule Y, Dobson AE, Woldeyohannes D, et al. Community Health Volunteers in Primary Healthcare in Rural Uganda: Factors Influencing Performance. *Front Public Heal.* 2017;5(March):1-8. doi:10.3389/fpubh.2017.00062.
8. Weidert K, Gessesew A, Bell S, Godefay H, Prata N. Community Health Workers as Social Marketers of Injectable Contraceptives: A Case Study from Ethiopia. *Glob Heal Sci Pract.* 2017;5(1):44-56. doi:10.9745/GHSP-D-16-00344.
9. Sudhakar M, Woldie M, Yitbarek K, Abamecha F, Tamirat A. Primary Care Systems Profiles and Performance (PRIMASYS): Ethiopian Case study. *Alliance Heal Policy Syst Res.* 2017. doi:10.1186/1478-4491-11-39.12.

10. Banteyerga H. Ethiopia ' s Health Extension Program: Improving Health through Community Involvement. *MEDICC Rev.* 2011;13(3):46-49.
11. Wang H, Tesfaye R, Ramana GN V, Chekagn CT. *Ethiopia Health Extension Program.* Publishing and Knowledge Division, The World Bank; 2016. doi:10.1596/978-1-4648-0815-9.
12. Selamu M, Asher L, Hanlon C, et al. Beyond the biomedical: Community resources for mental health care in rural Ethiopia. *PLoS One.* 2015;10(5):1-14. doi:10.1371/journal.pone.0126666.
13. Ethiopian Federal Minstry of Health. *Health Sector Transformation Plan (2015/16 - 2019/20).* Addis Ababa, Ethiopia; 2015. <https://searchworks.stanford.edu/view/11700944>.
14. Betemariam W, Damtew Z, Tesfaye C, Fesseha N, Karim AM. Effect of Ethiopia's Health Development Army on maternal and newborn health care practices: A multi-level cross-sectional analysis. *Ann Glob Heal.* 2017;83(1):24. doi:10.1016/j.aogh.2017.03.051.
15. Maes K, Closser S, Vorel E, Tesfaye Y. Using community health workers: Discipline and hierarchy in Ethiopia's women's development army Ethiopia's women's development army. *Ann Anthropol Pract.* 2015;39(1):42-57. doi:10.1111/napa.12064.
16. Maes K, Closser S, Vorel E, Tesfaye Y. A Women's Development Army: Narratives of Community Health Worker Investment and Empowerment in Rural Ethiopia. *Stud Comp Int Dev.* 2015;50(4):455-478. doi:10.1007/s12116-015-9197-z.
17. George AS, Mehra V, Scott K, Sriram V. Community participation in health systems research: A systematic review assessing the state of research, the nature of interventions involved and the features of engagement with communities. *PLoS One.* 2015;10(10):1-25. doi:10.1371/journal.pone.0141091.
18. The Joanna Briggs Institute. *Checklist for Analytical Cross Sectional Studies.*; 2017.
19. The Joanna Briggs Institute. *Checklist for Case Control Studies.*; 2017.
20. The Joanna Briggs Institute. *Checklist for Qualitative Research.*; 2017.
21. Madisch I, Hofmayer S, Fickenscher H. Research-Gate authors page. <https://www.researchgate.net/home>. Published 2008. Accessed October 25, 2018.

- 1  
2  
3 22. Aregawi HG, Gebrehiwot TG, Abebe YG, Meles KG, Wuneh AD. Determinants of  
4 defaulting from completion of child immunization in Laelay Adiabo District, Tigray  
5 Region, Northern Ethiopia: A case-control study. *PLoS One*. 2017;12(9):1-13.  
6 doi:10.1371/journal.pone.0185533.  
7  
8  
9  
10 23. Godefay H, Byass P, Graham WJ, Kinsman J, Mulugeta A. Risk factors for maternal  
11 mortality in rural Tigray, Northern Ethiopia: A case-control study. *PLoS One*.  
12 2015;10(12):1-12. doi:10.1371/journal.pone.0144975.  
13  
14  
15 24. Negero MG, Mitike YB, Worku AG, Abota TL. Skilled delivery service utilization and its  
16 association with the establishment of Women's Health Development Army in Yeky  
17 district, South West Ethiopia: a multilevel analysis. *BMC Res Notes*. 2018;11(1):83.  
18 doi:10.1186/s13104-018-3140-0.  
19  
20  
21 25. Girmaye M, Berhan Y. Skilled Antenatal Care Service Utilization and Its Association with  
22 the Characteristics of Women's Health Development Team in Yeky District, South-West  
23 Ethiopia: A Multilevel Analysis. *Ethiop J Health Sci*. 2016;26:369-380.  
24 doi:10.4314/ejhs.v26i4.9.  
25  
26  
27 26. Zepre K, Kaba M. Birth preparedness and complication readiness among rural women of  
28 reproductive age in Abeshige district, Guraghe zone, SNNPR, Ethiopia. *Int J Womens*  
29 *Health*. 2017;9:11-21. doi:10.2147/IJWH.S111769.  
30  
31  
32 27. Jackson R, Hailemariam A. The role of health extension workers in linking pregnant  
33 women with health facilities for delivery in rural and pastoralist areas of Ethiopia. *Ethiop*  
34 *J Health Sci*. 2016;26(5):471. doi:10.4314/ejhs.v26i5.9.  
35  
36  
37 28. Jackson R, Tesfay FH, Gebrehiwot TG, Godefay H. Factors that hinder or enable maternal  
38 health strategies to reduce delays in rural and pastoralist areas in Ethiopia. *Trop Med Int*  
39 *Heal*. 2017;22(2):148-160. doi:10.1111/tmi.12818.  
40  
41  
42 29. Jackson R, Tesfay FH, Godefay H, Gebrehiwot TG. Health extension workers' and  
43 mothers' attitudes to maternal health service utilization and acceptance in Adwa Woreda,  
44 Tigray Region, Ethiopia. *PLoS One*. 2016;11(3):1-15. doi:10.1371/journal.pone.0150747.  
45  
46  
47 30. Kok MC, Kea AZ, Datiko DG, et al. A qualitative assessment of health extension  
48 workers' relationships with the community and health sector in Ethiopia: Opportunities  
49  
50  
51  
52  
53  
54  
55  
56  
57  
58  
59  
60

- for enhancing maternal health performance. *Hum Resour Health*. 2015;13(1):1-12.  
doi:10.1186/s12960-015-0077-4.
31. Federal Democratic Republic of Ethiopia Ministry of Health. *Health Sector Development Program III (2005/6-2009/10)*. Addis Ababa, Ethiopia; 2005.  
[http://www.nationalplanningcycles.org/sites/default/files/planning\\_cycle\\_repository/ethiopia/ethiopia-health-sector-development-planhsdp-iii.pdf](http://www.nationalplanningcycles.org/sites/default/files/planning_cycle_repository/ethiopia/ethiopia-health-sector-development-planhsdp-iii.pdf).
32. Federal Democratic Republic of Ethiopia Ministry of Health. *Health Sector Development Program IV October 2010 Contents*. Addis Ababa, Ethiopia; 2010. <https://phe-ethiopia.org/admin/uploads/attachment-721-HSDP IV Final Draft 11Octoberr 2010.pdf>.
33. Gopalan SS, Mohanty S, Das A. Assessing community health workers' performance motivation: A mixed-methods approach on India's Accredited Social Health Activists (ASHA) programme. *BMJ Open*. 2012;2(5):1-10. doi:10.1136/bmjopen-2012-001557.
34. Singh D, Negin J, Orach CG, Cumming R. Supportive supervision for volunteers to deliver reproductive health education: a cluster randomized trial. *Reprod Health*. 2016;13(1):1-10. doi:10.1186/s12978-016-0244-7.
35. Glenton C, Colvin C, Carlsen B, et al. Barriers and facilitators to the implementation of lay health worker programmes to improve access to maternal and child health: Qualitative evidence synthesis. *Cochrane Database Syst Rev*. 2013;2013(2):326-328.  
doi:10.1080/00222338808053404.
36. Panday S, Bissell P, Van Teijlingen E, Simkhada P. The contribution of female community health volunteers (FCHVs) to maternity care in Nepal: A qualitative study. *BMC Health Serv Res*. 2017;17(1):1-11. doi:10.1186/s12913-017-2567-7.
37. World Health Organization. Community involvement in health development: challenging health services, report of a WHO study group [meeting in Geneva from 11 to 18 December 1989]. *WHO Tech Rep Ser*. 1991;(809):56 p.
38. Hitchcock JM. Providing health care: community agency involvement. *Bull Am Coll Nurse Midwives*. 1971;16(1):12-18. doi:10.1111/j.1542-2011.1971.tb00056.x.
39. Suryadevara M, Bonville CA, Ferraioli F, Domachowske JB. Community-Centered Education Improves Vaccination Rates in Children From Low-Income Households.

- 1  
2  
3 *Pediatrics*. 2013;132(2):319-325. doi:10.1542/peds.2012-3927.  
4  
5  
6 40. Kawakatsu Y, Tanaka J, Ogawa K, Ogendo K, Honda S. Effects of three interventions and  
7 determinants of full vaccination among children aged 12-59 months in Nyanza province,  
8 Kenya. *Public Health*. 2015;129(11):1530-1538. doi:10.1016/j.puhe.2015.07.008.  
9  
10  
11 41. Lewin S, Munabi-Babigumira S, Glenton C, et al. Lay health workers in primary and  
12 community health care for maternal and child health and the management of infectious  
13 diseases. [Review] [246 refs][Update of Cochrane Database Syst Rev.  
14 2005;(1):CD004015; PMID: 15674924]. *Cochrane database Syst Rev*. 2010;(3).  
15 doi:10.1002/14651858.CD004015.pub3.  
16  
17  
18 42. Glenton C, Scheel IB, Lewin S, Swingler GH. Can lay health workers increase the uptake  
19 of childhood immunisation? Systematic review and typology. *Trop Med Int Heal*.  
20 2011;16(9):1044-1053. doi:10.1111/j.1365-3156.2011.02813.x.  
21  
22  
23 43. Saeterdal I, Lewin S, Austvoll-Dahlgren A, Glenton C, Munabi-Babigumira S.  
24 Interventions aimed at communities to inform and/or educate about early childhood  
25 vaccination. *Cochrane Database Syst Rev*. 2014;2014(11).  
26 doi:10.1002/14651858.CD010232.pub2.  
27  
28  
29 44. Rai S, Misra P, Upadhyay R, Anand K, Kant S. Public health approach to address  
30 maternal mortality. *Indian J Public Health*. 2012;56(3):196. doi:10.4103/0019-  
31 557X.104231.  
32  
33  
34 45. Charanthimath U, Vidler M, Katageri G, et al. The feasibility of task-sharing the  
35 identification, emergency treatment, and referral for women with pre-eclampsia by  
36 community health workers in India. *Reprod Health*. 2018;15(101):77-86.  
37 doi:10.1186/s12978-018-0532-5.  
38  
39  
40 46. World Health Organization/United Nations Childrens Fund. WHO/UNICEF Joint  
41 statement: Home visits for the newborn child: a strategy to improve survival. *WHO Libr*.  
42 2009:1-8.  
43  
44  
45 47. World Health Organization. *WHO Recommendations on Interventions to Improve Preterm  
46 Birth Outcomes.*; 2015.  
47  
48  
49  
50  
51  
52  
53  
54  
55  
56  
57  
58  
59  
60

- 1  
2  
3  
4  
5  
6  
7  
8  
9  
10  
11  
12  
13  
14  
15  
16  
17  
18  
19  
20  
21  
22  
23  
24  
25  
26  
27  
28  
29  
30  
31  
32  
33  
34  
35  
36  
37  
38  
39  
40  
41  
42  
43  
44  
45  
46  
47  
48  
49  
50  
51  
52  
53  
54  
55  
56  
57  
58  
59  
60
48. Keya KT, Rob U, Rahman MM, Bajracharya A, Bellows B. Distance, Transportation Cost, and Mode of Transport in the Utilization of Facility-Based Maternity Services: Evidence from Rural Bangladesh. *Int Q Community Health Educ*. 2014;35(1):37-51. doi:10.2190/IQ.35.1.d.
  49. Gage AJ, Guirlène Calixte M. Effects of the physical accessibility of maternal health services on their use in rural Haiti. *Popul Stud (NY)*. 2006;60(3):271-288. doi:10.1080/00324720600895934.
  50. Ebu NI, Gross J. Factors influencing access to antenatal services and delivery care in sub-Saharan Africa. *Afr J Midwifery Womens Health*. 2015;9(2):58-65. doi:10.12968/ajmw.2015.9.2.58.
  51. Keya KT, Rahman MM, Rob U, Bellows B. Distance travelled and cost of transport for use of facility-based maternity services in rural Bangladesh: a cross-sectional survey. *Lancet*. 2013;382:17. doi:10.1016/S0140-6736(13)62178-9.
  52. Kawakatsu Y, Sugishita T, Oruenjo K, et al. Determinants of health facility utilization for childbirth in rural western Kenya: Cross-sectional study. *BMC Pregnancy Childbirth*. 2014;14(1). doi:10.1186/1471-2393-14-265.
  53. Saprii L, Richards E, Kokho P, Theobald S. Community health workers in rural India: Analysing the opportunities and challenges Accredited Social Health Activists (ASHAs) face in realising their multiple roles. *Hum Resour Health*. 2015;13(1):1-13. doi:10.1186/s12960-015-0094-3.
  54. Wilford A, Phakathi S, Haskins L, Jama NA, Mntambo N, Horwood C. Exploring the care provided to mothers and children by community health workers in South Africa: Missed opportunities to provide comprehensive care. *BMC Public Health*. 2018;18(1):1-10. doi:10.1186/s12889-018-5056-y.
  55. O'Donovan J, O'Donovan C, Kuhn I, Sachs SE, Winters N. Ongoing training of community health workers in low-income and middle-income countries: a systematic scoping review of the literature. *BMJ Open*. 2018;8(4):e021467. doi:10.1136/bmjopen-2017-021467.
  56. Ballard M, Montgomery P. Systematic review of interventions for improving the

- 1  
2  
3 performance of community health workers in low-income and middle-income countries.  
4 *BMJ Open*. 2017;7(10). doi:10.1136/bmjopen-2016-014216.  
5  
6  
7 57. Wakabi W. Extension workers drive Ethiopia's primary health care. *Lancet*.  
8 2008;372(9642):880. doi:10.1016/S0140-6736(08)61381-1.  
9  
10  
11 58. World Health Organization, Global Health Workforce Alliance. Country Case Study:  
12 Ethiopia's human resources for health program. *Heal (San Fr)*. 2008:1-7.  
13  
14  
15 59. Central Statistical Agency [Ethiopia] and ICF International. *Ethiopia Demographic and*  
16 *Health Survey 2016*.; 2016. <https://dhsprogram.com/pubs/pdf/FR328/FR328.pdf>.  
17  
18  
19 60. Central Statistical Authority [Ethiopia], ORC Macro. *Ethiopia Demographic and Health*  
20 *Survey 2011*.; 2011. doi:10.1037/0022-006X.73.3.506.  
21  
22  
23 61. Central Statistical Authority [Ethiopia], ORC Macro. *Ethiopia Demographic and Health*  
24 *Survey 2000*.; 2000.  
25  
26  
27 62. Central Statistical Authority [Ethiopia], ORC Macro. *Ethiopia Demographic and Health*  
28 *Survey 2005*.; 2006.  
29 [http://www.measuredhs.com/pubs/pdf/FR179/FR179\[23June2011\].pdf](http://www.measuredhs.com/pubs/pdf/FR179/FR179[23June2011].pdf).  
30  
31  
32  
33  
34  
35  
36  
37  
38  
39  
40  
41  
42  
43  
44  
45  
46  
47  
48  
49  
50  
51  
52  
53  
54  
55  
56  
57  
58  
59  
60



1  
2  
3 Figure legend:  
4

5 Figure 1: Literature search and screening  
6  
7  
8  
9  
10  
11  
12  
13  
14  
15  
16  
17  
18  
19  
20  
21  
22  
23  
24  
25  
26  
27  
28  
29  
30  
31  
32  
33  
34  
35  
36  
37  
38  
39  
40  
41  
42  
43  
44  
45  
46  
47  
48  
49  
50  
51  
52  
53  
54  
55  
56  
57  
58  
59  
60

For peer review only

1  
2  
3  
4  
5  
6  
7  
8  
9  
10  
11  
12  
13  
14  
15  
16  
17  
18  
19  
20  
21  
22  
23  
24  
25  
26  
27  
28  
29  
30  
31  
32  
33  
34  
35  
36  
37  
38  
39  
40  
41  
42  
43  
44  
45  
46  
47  
48  
49  
50  
51  
52  
53  
54  
55  
56  
57  
58  
59  
60

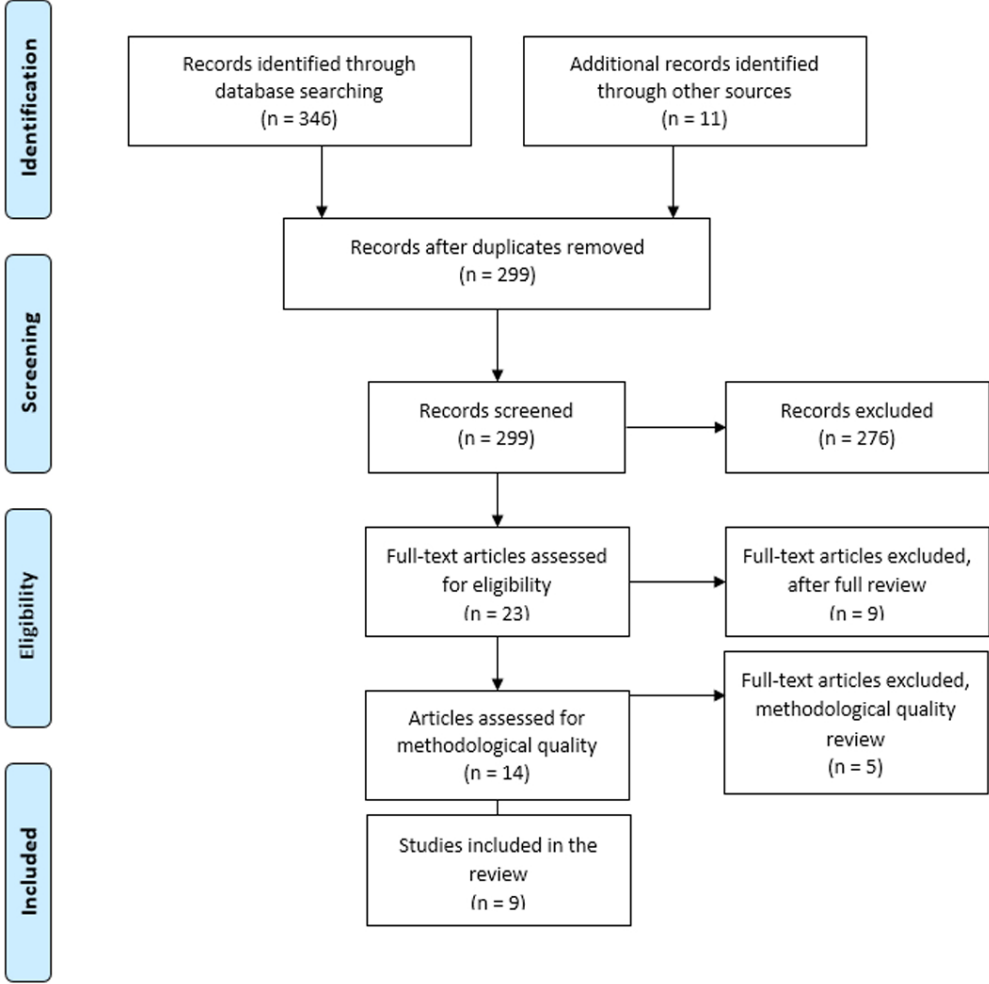

Literature search and screening  
90x90mm (300 x 300 DPI)

**Supplementary file I: Search strategy**

| Search | Query                                                                                                                                                                                                   |
|--------|---------------------------------------------------------------------------------------------------------------------------------------------------------------------------------------------------------|
| #1     | Search (((((((community health workers) OR community volunteer) OR women's development army) OR women's development team) OR health development team) OR lay health workers) OR health development army |
| #2     | Search (((maternal health) OR maternal health service) OR child health) OR child health service) OR health                                                                                              |
| #3     | Search Ethiopia                                                                                                                                                                                         |
| #4     | #1 AND #2 AND #3                                                                                                                                                                                        |
| #5     | Limit to: Full text                                                                                                                                                                                     |
| #6     | Limit to: Publication date from 2010/01/01 to 2018/12/31                                                                                                                                                |
| #7     | Limit to: English language                                                                                                                                                                              |

## Supplementary file II: Critical appraisal result

### Case control

| Studies                                | Q1 | Q2 | Q3 | Q4 | Q5 | Q6 | Q7 | Q8 | Q9 | Q10 | Total      |
|----------------------------------------|----|----|----|----|----|----|----|----|----|-----|------------|
| Aregawi HG. et al <sup>18</sup>        | U  | Y  | Y  | Y  | Y  | Y  | Y  | Y  | U  | Y   | 8 Y<br>2 U |
| Godefay H, Byass P et al <sup>19</sup> | U  | Y  | Y  | Y  | Y  | Y  | Y  | Y  | U  | Y   | 8 Y<br>2 U |

### Cross-sectional

| Studies                                | Q1 | Q2 | Q3 | Q4 | Q5 | Q6 | Q7 | Q8 | Total             |
|----------------------------------------|----|----|----|----|----|----|----|----|-------------------|
| Haile F. et al <sup>43</sup>           | Y  | Y  | N  | Y  | Y  | Y  | U  | Y  | 5 Y<br>2 N<br>1 U |
| Negero MG. et al <sup>20</sup>         | Y  | Y  | U  | Y  | Y  | Y  | Y  | Y  | 7 Y<br>1 U        |
| Zepre K. et al <sup>22</sup>           | Y  | Y  | Y  | Y  | Y  | Y  | U  | Y  | 7 Y<br>1 U        |
| Girmaye M. and Berhan Y. <sup>21</sup> | Y  | Y  | Y  | Y  | Y  | Y  | U  | Y  | 7 Y<br>1 U        |

### Qualitative

| Studies                     | Q1 | Q2 | Q3 | Q4 | Q5 | Q6 | Q7 | Q8 | Q9 | Q10 | Total             |
|-----------------------------|----|----|----|----|----|----|----|----|----|-----|-------------------|
| Banteyerga H. <sup>44</sup> | Y  | U  | Y  | Y  | Y  | N  | N  | Y  | N  | Y   | 6 Y<br>3 N<br>1 U |
| Maes K. et al <sup>15</sup> | U  | U  | U  | U  | U  | N  | N  | Y  | Y  | U   | 2 Y<br>2 N<br>6 U |
| Sako B. et al <sup>45</sup> | Y  | Y  | Y  | Y  | Y  | N  | N  | Y  | Y  | Y   | 8 Y<br>2 N        |

|                                                            |   |   |   |   |   |   |   |   |   |   |                   |
|------------------------------------------------------------|---|---|---|---|---|---|---|---|---|---|-------------------|
| Jackson R., Hailemariam A. et al. <sup>23</sup>            | U | Y | Y | Y | Y | N | N | Y | Y | Y | 7 Y<br>2 N<br>1 U |
| Jackson R., Tesfay FH., Gebrehiwot TG. et al <sup>24</sup> | Y | Y | Y | Y | Y | N | N | Y | Y | Y | 8 Y<br>2 N        |
| Jackson R., Tesfay FH., Godefay H. et al <sup>25</sup>     | Y | Y | Y | Y | Y | N | Y | Y | Y | Y | 9 Y<br>1 N        |
| Kok MC., Kea AZ. et al <sup>26</sup>                       | Y | Y | Y | Y | Y | N | N | Y | Y | Y | 8 Y<br>2 N        |
| Maesa K., Closser S. et al <sup>16</sup>                   | U | Y | Y | Y | Y | N | N | U | Y | Y | 6 Y<br>2 N<br>2 U |

Y: Yes; N: No; U: Unclear

1  
2  
3  
4  
5  
6  
7  
8  
9  
10  
11  
12  
13  
14  
15  
16  
17  
18  
19  
20  
21  
22  
23  
24  
25  
26  
27  
28  
29  
30  
31  
32  
33  
34  
35  
36  
37  
38  
39  
40  
41  
42  
43  
44  
45  
46  
47  
48  
49  
50  
51  
52  
53  
54  
55  
56  
57  
58  
59  
60

**Supplementary file III: Data extraction checklist**

Qualitative

| Study ID | Study Design | Population | Phenomenon of interest | Outcome | Remark |
|----------|--------------|------------|------------------------|---------|--------|
|          |              |            |                        |         |        |
|          |              |            |                        |         |        |
|          |              |            |                        |         |        |
|          |              |            |                        |         |        |
|          |              |            |                        |         |        |

Quantitative

| Study ID | Study Design | Population | Outcome | Result | Remark |
|----------|--------------|------------|---------|--------|--------|
|          |              |            |         |        |        |
|          |              |            |         |        |        |
|          |              |            |         |        |        |
|          |              |            |         |        |        |
|          |              |            |         |        |        |

### Supplementary file IV: Table of included studies

| Study                                               | Purpose                                                                                                                                                        | Study design    | Participants and sample size                                                                                                                                |
|-----------------------------------------------------|----------------------------------------------------------------------------------------------------------------------------------------------------------------|-----------------|-------------------------------------------------------------------------------------------------------------------------------------------------------------|
| Aregawi HG, Gebrehiwot TG et al, 2017 <sup>18</sup> | To identify the determinants of defaulting from child immunization completion among children aged 9-23 months in the Laelay Adiabo District, North Ethiopia.   | Case-control    | 270 children aged 9-23 months <ul style="list-style-type: none"> <li>• 90 cases and</li> <li>• 180 controls</li> </ul>                                      |
| Godefay H, Byass P et al, 2015 <sup>19</sup>        | To characterize individual risk factors for maternal mortality in Tigray, Ethiopia.                                                                            | Case-control    | The sample size was 310 <ul style="list-style-type: none"> <li>• 62 cases and</li> <li>• 248 controls</li> </ul> from six randomly-selected rural districts |
| Zepre K and Kaba M, 2017 <sup>22</sup>              | To assess the current BPCR practice and determine associated factors among rural women of reproductive age in Abeshige district, Guraghe zone, SNNPR, Ethiopia | Cross-sectional | 454 women who delivered within 12 months prior to this survey                                                                                               |
| Negero MG. et al, 2018 <sup>20</sup>                | To assess Skilled delivery service utilization and its association with the establishment of Women's Health Development army                                   | Cross-sectional | 748 reproductive-age women who gave birth in 1 year preceding the study in 380 clusters of WDA were included                                                |
| Girmaye M. and Berhan Y. <sup>21</sup>              | To assess Skilled ANC service utilization and its association with the establishment of                                                                        | Cross-sectional | 748 reproductive-age women who gave birth in 1 year preceding the study                                                                                     |

|                                                   | Women's Health Development army                                                                                                                                                           |             |                                                                                                                                                                                                                                            |
|---------------------------------------------------|-------------------------------------------------------------------------------------------------------------------------------------------------------------------------------------------|-------------|--------------------------------------------------------------------------------------------------------------------------------------------------------------------------------------------------------------------------------------------|
| Jackson R. and Hailemariam A., 2016 <sup>23</sup> | To examine the barriers and facilitators for HEWs as they refer women to mid-level health facilities for birth.                                                                           | Qualitative | 45 HEWs, 14 women extension workers (employed by Afar Pastoralist Development Association, Afar Region) and 11 other health workers from health centers, hospitals or health offices.                                                      |
| Jackson R. Tesfay FH. et al, 2017 <sup>24</sup>   | To document factors that hinder or enable strategies to reduce the first and second delays of the Three Delays in rural and pastoralist areas in Ethiopia                                 | Qualitative | A key informant study was conducted with 44 HEWs in Afar, SNNP, and Tigray Regions                                                                                                                                                         |
| Jackson R. Tesfay FH. et al, 2016 <sup>25</sup>   | To explored HEWs' and mother's attitudes to maternal health services in Adwa Woreda, Tigray Region.                                                                                       | Qualitative | 45 women were interviewed                                                                                                                                                                                                                  |
| Kok MC. et al., 2015 <sup>26</sup>                | To understand how relationships between HEWs, the community and health sector were shaped, in order to inform policy on optimizing HEW performance in providing maternal health services. | Qualitative | 14 FGDs with HEWs, women and men from the community and 44 semi-structured interviews with HEWs; key informants working in program management, health service delivery and supervision of HEWs; mothers; and traditional birth attendants. |



# Reporting checklist for systematic review and meta-analysis.

Based on the PRISMA guidelines.

## Instructions to authors

Complete this checklist by entering the page numbers from your manuscript where readers will find each of the items listed below.

Your article may not currently address all the items on the checklist. Please modify your text to include the missing information. If you are certain that an item does not apply, please write "n/a" and provide a short explanation.

Upload your completed checklist as an extra file when you submit to a journal.

In your methods section, say that you used the PRISMA reporting guidelines, and cite them as:

Moher D, Liberati A, Tetzlaff J, Altman DG, The PRISMA Group. Preferred Reporting Items for Systematic Reviews and Meta-Analyses: The PRISMA Statement

|                           |                    | Reporting Item                                                                                                                                                                                                                                                                                             | Page Number |
|---------------------------|--------------------|------------------------------------------------------------------------------------------------------------------------------------------------------------------------------------------------------------------------------------------------------------------------------------------------------------|-------------|
|                           | <a href="#">#1</a> | Identify the report as a systematic review, meta-analysis, or both.                                                                                                                                                                                                                                        | 1           |
| Structured summary        | <a href="#">#2</a> | Provide a structured summary including, as applicable: background; objectives; data sources; study eligibility criteria, participants, and interventions; study appraisal and synthesis methods; results; limitations; conclusions and implications of key findings; systematic review registration number | 2           |
| Rationale                 | <a href="#">#3</a> | Describe the rationale for the review in the context of what is already known.                                                                                                                                                                                                                             | 4-5         |
| Objectives                | <a href="#">#4</a> | Provide an explicit statement of questions being addressed with reference to participants, interventions, comparisons, outcomes, and study design (PICOS).                                                                                                                                                 | 6           |
| Protocol and registration | <a href="#">#5</a> | Indicate if a review protocol exists, if and where it can be accessed (e.g., Web address) and, if available, provide registration information including the registration number.                                                                                                                           |             |

|    |                                    |                     |                                                                                                                                                                                                                                 |     |
|----|------------------------------------|---------------------|---------------------------------------------------------------------------------------------------------------------------------------------------------------------------------------------------------------------------------|-----|
| 1  | Eligibility criteria               | <a href="#">#6</a>  | Specify study characteristics (e.g., PICOS, length of follow-up) and report characteristics (e.g., years considered, language, publication status) used as criteria for eligibility, giving rational                            | 6   |
| 2  |                                    |                     |                                                                                                                                                                                                                                 |     |
| 3  |                                    |                     |                                                                                                                                                                                                                                 |     |
| 4  |                                    |                     |                                                                                                                                                                                                                                 |     |
| 5  |                                    |                     |                                                                                                                                                                                                                                 |     |
| 6  | Information sources                | <a href="#">#7</a>  | Describe all information sources in the search (e.g., databases with dates of coverage, contact with study authors to identify additional studies) and date last searched.                                                      | 6   |
| 7  |                                    |                     |                                                                                                                                                                                                                                 |     |
| 8  |                                    |                     |                                                                                                                                                                                                                                 |     |
| 9  |                                    |                     |                                                                                                                                                                                                                                 |     |
| 10 |                                    |                     |                                                                                                                                                                                                                                 |     |
| 11 | Search                             | <a href="#">#8</a>  | Present full electronic search strategy for at least one database, including any limits used, such that it could be repeated.                                                                                                   | 6   |
| 12 |                                    |                     |                                                                                                                                                                                                                                 |     |
| 13 |                                    |                     |                                                                                                                                                                                                                                 |     |
| 14 |                                    |                     |                                                                                                                                                                                                                                 |     |
| 15 | Study selection                    | <a href="#">#9</a>  | State the process for selecting studies (i.e., for screening, for determining eligibility, for inclusion in the systematic review, and, if applicable, for inclusion in the meta-analysis).                                     | 7-8 |
| 16 |                                    |                     |                                                                                                                                                                                                                                 |     |
| 17 |                                    |                     |                                                                                                                                                                                                                                 |     |
| 18 |                                    |                     |                                                                                                                                                                                                                                 |     |
| 19 |                                    |                     |                                                                                                                                                                                                                                 |     |
| 20 |                                    |                     |                                                                                                                                                                                                                                 |     |
| 21 | Data collection process            | <a href="#">#10</a> | Describe the method of data extraction from reports (e.g., piloted forms, independently by two reviewers) and any processes for obtaining and confirming data from investigators.                                               | 9   |
| 22 |                                    |                     |                                                                                                                                                                                                                                 |     |
| 23 |                                    |                     |                                                                                                                                                                                                                                 |     |
| 24 |                                    |                     |                                                                                                                                                                                                                                 |     |
| 25 |                                    |                     |                                                                                                                                                                                                                                 |     |
| 26 | Data items                         | <a href="#">#11</a> | List and define all variables for which data were sought (e.g., PICOS, funding sources), and any assumptions and simplifications made.                                                                                          |     |
| 27 |                                    |                     |                                                                                                                                                                                                                                 |     |
| 28 |                                    |                     |                                                                                                                                                                                                                                 |     |
| 29 |                                    |                     |                                                                                                                                                                                                                                 |     |
| 30 |                                    |                     |                                                                                                                                                                                                                                 |     |
| 31 | Risk of bias in individual studies | <a href="#">#12</a> | Describe methods used for assessing risk of bias in individual studies (including specification of whether this was done at the study or outcome level, or both), and how this information is to be used in any data synthesis. |     |
| 32 |                                    |                     |                                                                                                                                                                                                                                 |     |
| 33 |                                    |                     |                                                                                                                                                                                                                                 |     |
| 34 |                                    |                     |                                                                                                                                                                                                                                 |     |
| 35 |                                    |                     |                                                                                                                                                                                                                                 |     |
| 36 |                                    |                     |                                                                                                                                                                                                                                 |     |
| 37 |                                    |                     |                                                                                                                                                                                                                                 |     |
| 38 | Summary measures                   | <a href="#">#13</a> | State the principal summary measures (e.g., risk ratio, difference in means).                                                                                                                                                   |     |
| 39 |                                    |                     |                                                                                                                                                                                                                                 |     |
| 40 |                                    |                     |                                                                                                                                                                                                                                 |     |
| 41 |                                    |                     |                                                                                                                                                                                                                                 |     |
| 42 | Planned methods of analysis        | <a href="#">#14</a> | Describe the methods of handling data and combining results of studies, if done, including measures of consistency (e.g., I <sup>2</sup> ) for each meta-analysis.                                                              | 9   |
| 43 |                                    |                     |                                                                                                                                                                                                                                 |     |
| 44 |                                    |                     |                                                                                                                                                                                                                                 |     |
| 45 |                                    |                     |                                                                                                                                                                                                                                 |     |
| 46 |                                    |                     |                                                                                                                                                                                                                                 |     |
| 47 | Risk of bias across studies        | <a href="#">#15</a> | Specify any assessment of risk of bias that may affect the cumulative evidence (e.g., publication bias, selective reporting within studies).                                                                                    |     |
| 48 |                                    |                     |                                                                                                                                                                                                                                 |     |
| 49 |                                    |                     |                                                                                                                                                                                                                                 |     |
| 50 |                                    |                     |                                                                                                                                                                                                                                 |     |
| 51 |                                    |                     |                                                                                                                                                                                                                                 |     |
| 52 |                                    |                     |                                                                                                                                                                                                                                 |     |
| 53 | Additional analyses                | <a href="#">#16</a> | Describe methods of additional analyses (e.g., sensitivity or subgroup analyses, meta-regression), if done, indicating which were pre-specified.                                                                                |     |
| 54 |                                    |                     |                                                                                                                                                                                                                                 |     |
| 55 |                                    |                     |                                                                                                                                                                                                                                 |     |
| 56 |                                    |                     |                                                                                                                                                                                                                                 |     |
| 57 |                                    |                     |                                                                                                                                                                                                                                 |     |
| 58 | Study selection                    | <a href="#">#17</a> | Give numbers of studies screened, assessed for eligibility, and                                                                                                                                                                 | 7-8 |
| 59 |                                    |                     |                                                                                                                                                                                                                                 |     |
| 60 |                                    |                     |                                                                                                                                                                                                                                 |     |

included in the review, with reasons for exclusions at each stage, ideally with a flow diagram.

|    |                    |                                                                      |       |
|----|--------------------|----------------------------------------------------------------------|-------|
| 1  |                    |                                                                      |       |
| 2  |                    |                                                                      |       |
| 3  |                    |                                                                      |       |
| 4  | Study              | <a href="#">#18</a>                                                  | 10    |
| 5  | characteristics    | For each study, present characteristics for which data were          |       |
| 6  |                    | extracted (e.g., study size, PICOS, follow-up period) and provide    |       |
| 7  |                    | the citation.                                                        |       |
| 8  |                    |                                                                      |       |
| 9  | Risk of bias       | <a href="#">#19</a>                                                  |       |
| 10 | within studies     | Present data on risk of bias of each study and, if available, any    |       |
| 11 |                    | outcome-level assessment (see Item 12).                              |       |
| 12 |                    |                                                                      |       |
| 13 | Results of         | <a href="#">#20</a>                                                  | 10-14 |
| 14 | individual studies | For all outcomes considered (benefits and harms), present, for       |       |
| 15 |                    | each study: (a) simple summary data for each intervention group      |       |
| 16 |                    | and (b) effect estimates and confidence intervals, ideally with a    |       |
| 17 |                    | forest plot.                                                         |       |
| 18 |                    |                                                                      |       |
| 19 |                    |                                                                      |       |
| 20 | Synthesis of       | <a href="#">#21</a>                                                  | 10-14 |
| 21 | results            | Present the main results of the review. If meta-analyses are         |       |
| 22 |                    | done, include for each, confidence intervals and measures of         |       |
| 23 |                    | consistency.                                                         |       |
| 24 |                    |                                                                      |       |
| 25 | Risk of bias       | <a href="#">#22</a>                                                  |       |
| 26 | across studies     | Present results of any assessment of risk of bias across studies     |       |
| 27 |                    | (see Item 15).                                                       |       |
| 28 |                    |                                                                      |       |
| 29 | Additional         | <a href="#">#23</a>                                                  |       |
| 30 | analysis           | Give results of additional analyses, if done (e.g., sensitivity or   |       |
| 31 |                    | subgroup analyses, meta-regression [see Item 16]).                   |       |
| 32 |                    |                                                                      |       |
| 33 | Summary of         | <a href="#">#24</a>                                                  | 10-14 |
| 34 | Evidence           | Summarize the main findings, including the strength of evidence      |       |
| 35 |                    | for each main outcome; consider their relevance to key groups        |       |
| 36 |                    | (e.g., health care providers, users, and policy makers               |       |
| 37 |                    |                                                                      |       |
| 38 | Limitations        | <a href="#">#25</a>                                                  | 16    |
| 39 |                    | Discuss limitations at study and outcome level (e.g., risk of bias), |       |
| 40 |                    | and at review level (e.g., incomplete retrieval of identified        |       |
| 41 |                    | research, reporting bias).                                           |       |
| 42 |                    |                                                                      |       |
| 43 | Conclusions        | <a href="#">#26</a>                                                  | 15-16 |
| 44 |                    | Provide a general interpretation of the results in the context of    |       |
| 45 |                    | other evidence, and implications for future research.                |       |
| 46 |                    |                                                                      |       |
| 47 | Funding            | <a href="#">#27</a>                                                  | 17    |
| 48 |                    | Describe sources of funding or other support (e.g., supply of        |       |
| 49 |                    | data) for the systematic review; role of funders for the systematic  |       |
| 50 |                    | review.                                                              |       |
| 51 |                    |                                                                      |       |

The PRISMA checklist is distributed under the terms of the Creative Commons Attribution License CC-BY. This checklist can be completed online using <https://www.goodreports.org/>, a tool made by the [EQUATOR Network](#) in collaboration with [Penelope.ai](#)

# BMJ Open

## Contribution of women's development army to maternal and child health in Ethiopia: A systematic review of evidence

|                                 |                                                                                                                                                                                                                                                                                                                   |
|---------------------------------|-------------------------------------------------------------------------------------------------------------------------------------------------------------------------------------------------------------------------------------------------------------------------------------------------------------------|
| Journal:                        | <i>BMJ Open</i>                                                                                                                                                                                                                                                                                                   |
| Manuscript ID                   | bmjopen-2018-025937.R2                                                                                                                                                                                                                                                                                            |
| Article Type:                   | Research                                                                                                                                                                                                                                                                                                          |
| Date Submitted by the Author:   | 26-Feb-2019                                                                                                                                                                                                                                                                                                       |
| Complete List of Authors:       | Yitbarek, Kiddus; Jimma University, Health Policy and Management<br>Abraham, Gelila; Jimma University, Health Policy and Management<br>Sudhakar, Morankar ; Jimma University, Health behaviors and society;<br>Jimma University, Jimma University Rapid Review Response Center:<br>AHPSR/WHO Center of Excellence |
| <b>Primary Subject Heading</b>: | Health services research                                                                                                                                                                                                                                                                                          |
| Secondary Subject Heading:      | Public health, Health policy, Global health, Evidence based practice                                                                                                                                                                                                                                              |
| Keywords:                       | Women's development army, Maternal and child health, Ethiopia                                                                                                                                                                                                                                                     |
|                                 |                                                                                                                                                                                                                                                                                                                   |

SCHOLARONE™  
Manuscripts

1  
2  
3  
4 **Contribution of women's development army to maternal and child health in**  
5 **Ethiopia: A systematic review of evidence**  
6  
7

8 Kiddus Yitbarek<sup>1\*</sup> Gelila Abraham<sup>1</sup> Morankar Sudhakar<sup>2,3</sup>  
9

10 <sup>1</sup>Department of Health Policy and Management, Faculty of Public Health, Jimma University,  
11 Ethiopia, <sup>2</sup>Department of Health Behaviors and Society, Faculty of Public Health, Jimma  
12 University, Ethiopia, <sup>3</sup>The Ethiopian Evidenced Based Healthcare and Development Centre: A  
13 Joanna Briggs Institute Centre of Excellence  
14  
15  
16

17 \*Corresponding author  
18

19  
20 Email: [kiddus.yitbarek@ju.edu.et](mailto:kiddus.yitbarek@ju.edu.et) or [kiddus.yitbarek@yahoo.com](mailto:kiddus.yitbarek@yahoo.com)  
21

22 **Word count: 6083**  
23  
24  
25  
26  
27  
28  
29  
30  
31  
32  
33  
34  
35  
36  
37  
38  
39  
40  
41  
42  
43  
44  
45  
46  
47  
48  
49  
50  
51  
52  
53  
54  
55  
56  
57  
58  
59  
60

## Abstract

**Objective:** the aim of this review was to identify, appraise and synthesize studies that reported on the contribution of women's development army to maternal and child health development.

**Setting:** studies conducted in Ethiopia 2010 onwards and published in English were considered.

**Data Sources:** evidence were searched in MEDLINE, CINAHL, and EBSCOhost from 25 March to 10 April, 2018.

**Eligibility Criteria:** both quantitative and qualitative studies assessing the contribution of women's development army to maternal and child health were considered.

**Data Extraction and Synthesis:** Two independent reviewers have extracted data using pre-planned data extraction tool separately for each study design. Findings were synthesized using tables and narrative summary.

**Outcome:** maternal and child health services; maternal and child mortality.

**Results:** nine studies met the inclusion criteria and used for synthesis. The results revealed that participation and membership in women's development teams have a positive effect on minimizing maternal death and improving child immunization service use. Skilled delivery and antenatal care service use were higher in women's development teams located within two kilometers radius from health facilities. These groups were also the main sources of information for mothers to prepare themselves for birth and related complications. Moreover, well-established groups have strengthened the linkage of the health facility to the community so that, delays in maternal health service use were minimized; health extension workers could effectively refer women to a health facility for birth; and utilization of skilled birth service was improved.

**Conclusion:** voluntary health service intervention in Ethiopia has improved maternal and child health services' outcome. A decrease in maternal deaths, increase in antenatal and delivery service use and improved child immunization service uptake are attributable to this intervention. This linkage between community members and the primary health care system served as an effective and efficient mechanism to share information.

**Keywords:** Women's development army, Maternal and child health, Ethiopia

## Article summary

### Strengths and limitations of this study

- The review has used two independent reviewers who rigorously search and review published materials. Furthermore, a third reviewer was participated during disagreements arise between the two reviewers.
- The review has used structured procedure during literature search, appraisal, data collection and synthesis
- Despite the strengths described above, we have not conducted meta-analysis due to heterogeneous types of study designs and population included in this review
- We have included only full text articles found free online.

## Introduction

Evidence from various countries in the world disclosed that community volunteers' health service intervention has shown significant health impact.<sup>1,2</sup> They accomplish various functions related to health service delivery. In fact, usually, they do not have formal professional or paraprofessional education and can be involved in voluntary care. They intervene in health care after attending job-related pieces training. These community health volunteers have different names in different settings, for example, lay health workers, community health workers, and unpaid community volunteers.<sup>3,4</sup>

Community health volunteers have great importance, especially in less developed countries, so as to overcome the increasing demand for health care services and the shortage of formal health care providers.<sup>5</sup> After Alma Ata declaration of Primary Health Care (PHC), community involvement in the health care was given due attention in order to improve wide access and acceptance of the services by service users and the community at large. It is believed that problems cannot be solved from only the side of service providers and programmers. Moreover, it is a good strategy to mobilize resources relevant to health services.<sup>6-8</sup>

These health interventions using community volunteers have a sort of structure in some countries and unstructured in others.<sup>1,5</sup> Some nations linked the service under their PHC structure. Ethiopia is a good example of well-structured community health interventions. The primary health care unit (PHCU) is in the front line to PHC in the country. This system encompasses five satellite health posts (the lowest village-level health service facility) and a referral health center (HC). In the countries health care system, PHC is administered and the services facilitated in this point.<sup>9</sup> So as to address the deficit in human resources for health, Ethiopia launched the community health extension program (HEP) in 2004. It was implemented by establishing a health post and positioning two female health extension workers (HEWs) in every *kebele* (the smallest administrative division in Ethiopia). The HEP was launched to improve access to preventive, essential health services and to create a healthy environment. This program works to increase and sustain preventive health actions and health awareness. HEP has sixteen packages divided into four major categories.<sup>9-11</sup>



1  
2  
3 Six years after its introduction in 2010 a new innovative approach, Women's Development Army  
4 (WDA) was linked with HEP. The women's development army is a structural arrangement that  
5 involves women's development team (WDT) and one-to-five connections. One-to-five  
6 connections involve six household with in the same neighborhood. A women who knows 16  
7 packages of HEP and practice them all is chosen as a leader to serve five households. A household  
8 that implemented the 16 packages of HEP recognized as a model family. Five to six one-to-five  
9 connections together formulate a WDT, that mens 30 to 36 households in the same neighborhood  
10 constitute a WDT. Similar procedure followed to select the leader of WDTs in addition to says of  
11 members. They serve as volunteers.<sup>12</sup> This structure has various development roles, from which  
12 health is the major one.<sup>9</sup> At the community level, members of the community linked with the PHC  
13 system through this strategy.<sup>13</sup> It was adopted based on the experience that using a network of the  
14 community health volunteers increased the efficiency of HEWs in reaching households with  
15 actionable health messages. leader.<sup>10,14,15</sup>

16  
17  
18  
19  
20  
21  
22  
23  
24  
25  
26  
27 The WDT's developmental works are monitored in a meeting every two weeks by a command  
28 post formulated at the *kebele* level which is led by the *kebele* leader. The development team leaders  
29 undertake similar follow-up to the one-to-five networks.<sup>9</sup> WDTs and the leaders of one-to-five  
30 network selected with full participation of the members. Their trustworthiness to the team  
31 members and being model family are considered as criteria for selection.<sup>16</sup>

32  
33  
34  
35  
36  
37 Health extension workers in collaboration with *kebele* administration and personnel from other  
38 developmental sectors (the agricultural and educational) facilitate the formation of the WDTs and  
39 one-to-five networks. These unpaid health volunteers, WDT leaders, undertake various preventive  
40 and promotive health services in collaboration with HEWs. They carry out a number of tasks,  
41 including, support during health information delivery programs, keeping track of pregnancies and  
42 illnesses, helping during immunization campaigns, and transmitting messages between households  
43 and HEWs.<sup>9,10</sup>

44  
45  
46  
47  
48  
49  
50  
51 The WDA's contribution can be related to maternal and child health indicators as consecutive  
52 Ethiopian demographic and health surveys indicated. For instance, maternal death was 673 in 2005  
53 and 676 in 2011 per 100 000 live births. However, it became 412 in 2016, note that WDA structure  
54 was introduced in Ethiopia in 2010. Under 5 mortality was also decreased from 88 in 2011 to 67  
55  
56  
57

1  
2  
3 in 2016. Maternal health services have shown a massive increase during these points as compared  
4 to prior years. ANC increased from 28% in 2005 to 34% in 2011 and 62% in 2016. Institutional  
5 delivery increased from 5% in 2005 to 10% in 2011 and 26% in 2016. Postnatal care (PNC) was  
6 also increased from 5% in 2005 to 8% in 2011, and 17% in 2016.<sup>17-20</sup> These figures indicated that  
7 there is an impressive improvements in maternal and child health and service use after the  
8 introduction of WDA in the country.  
9  
10  
11  
12  
13  
14

15 The Ethiopian unpaid community health intervention has a unique structural arrangement. It is  
16 included in various development sectors' strategic plan.<sup>14</sup> Some evidence claim that the program  
17 has variations in aims, goals, and experiences among various players included and suggests further  
18 researchers.<sup>21</sup> This review aimed to assess the contribution of this structured community  
19 involvement in maternal and child health and service use.  
20  
21  
22  
23

## 24 **Methods**

### 25 **Search Strategy**

26  
27  
28 The search strategy targeted to find both published and unpublished studies. A step by step search  
29 strategy was utilized in this review. Primarily, major databases that comprise health system  
30 research including MEDLINE, CINAHL, and EBSCOhost were utilized. Unpublished works were  
31 also searched from ProQuest Dissertations and Theses and Google Scholar. Afterward the  
32 reference list of all identified reports and articles were searched for additional studies. Key words  
33 initially used were: community health workers, community volunteer, women's development  
34 army, women's development group, women's development team, health development team, lay  
35 health workers, health development army, Ethiopia, maternal health, child health, and maternal  
36 health services. Extracted references were downloaded and stored into Mendeley reference  
37 manager file. MEDLINE (on PubMed platform) search strategy is included in supplementary file  
38 I.  
39  
40  
41  
42  
43  
44  
45  
46  
47  
48

49 To guide the overall review, PRISMA flow diagram was used (Figure 1).<sup>22</sup> Starting from  
50 identification of records up to the inclusion of the relevant literature for the review question were  
51 documented to comprehensive and accurate reporting.  
52  
53  
54

### 55 **Inclusion and exclusion criteria**

Both quantitative and qualitative studies were included in this review regardless of their study design, given they included women in reproductive age group (14-49 years) and children less than five years of age for both sexes. To be considered the studies should have evaluated the effect of women's development army, and participation in the group on maternal mortality, maternal and child health service use. These are major intervention areas of WDAs regarding maternal and child health. Moreover, studies conducted in Ethiopia, 2010 (a year when WDA was introduced in Ethiopia) onwards and published in English language were considered for inclusion in this review. We have excluded narrative summaries, case reports and technical reports.

### **Description of studies**

Eleven potentially relevant studies were found with a free search in google scholar and google search bars in addition to the three hundred fifty-two studies identified in database searches. A total of 299 articles were eligible for primary examination after duplications were removed. On reviewing titles and abstracts against the review objectives and inclusion criteria, 276 studies were excluded. The full text of the remaining 23 studies was then retrieved for detailed examination and 9 were excluded. Afterward 14 studies were assessed for methodological quality. The quality assessment was done by two independent reviewers for methodological validity prior to inclusion in the review using standardized critical appraisal instruments from the Joanna Briggs Institute.<sup>23-25</sup> Disagreements that arise between the reviewers were resolved through discussion, and with the participation of a third reviewer. After the appraisal, five studies that did not meet the minimum requirements of methodological appraisal tools were excluded and nine were finally reviewed.

### **Patient and Public Involvement**

Patients and/or public were not involved in this review.

### **Data collection**

Before data collection all titles and abstracts of the searched pieces of literature were assessed for potential relevance, and those records deemed not relevant were verified. Later on, full-text reports were assessed for eligibility. In the cases we fail to get articles free online, we tried to obtain full texts from research-gate<sup>26</sup> authors' pages and we obtained three. Reports that are co-publications or multiple reports of the same study were identified. The eligibility criteria were applied to all reports. Only evidence thoughtful of the review's eligibility criteria were included. Studies that

1  
2  
3 fulfilled more than 70% of the critical appraisal checklists' requirements were selected to be  
4 included in the review (Supplementary file II).  
5  
6

7 Two independent reviewers collected information relevant for the review. Data extraction was for  
8 quantitative and qualitative studies separately using pre-designed checklists (Supplementary file  
9 III). The extracted data have included specific details about the interventions, populations, study  
10 methods and outcomes of significance to the review question and objectives (Supplementary file  
11 IV).  
12  
13  
14  
15

### 16 **Data synthesis and analysis**

17  
18 Findings from the included studies were synthesized using tables and a narrative summary. Meta-  
19 analysis was not possible since the included studies were heterogeneous in terms of the  
20 populations, methods and outcomes. We have categorized the results into participation in WDTs,  
21 distance of WDTs from health facility and effective functioning of WDTs. When we categorize  
22 the synthesis into these three parts we put a base on some major principles of PHC and their  
23 effectiveness. Access to basic preventive and promotive health care, active participation of the  
24 community in their health issues and effectiveness of the system.<sup>27</sup>  
25  
26  
27  
28  
29  
30  
31  
32  
33  
34  
35  
36  
37  
38  
39  
40  
41  
42  
43  
44  
45  
46  
47  
48  
49  
50  
51  
52  
53  
54  
55  
56  
57  
58  
59  
60

## Results: Findings of the Review

We have included a total of nine studies, that meet the requirements of critical appraisal checklists, regardless of their study design. These studies met the critical appraisal requirements of more than 70% (Supplementary file IV). The review comprised both observational and qualitative studies. The studies were conducted on various maternal and child health issues including child immunization, maternal mortality, birth preparedness and complication readiness (BPCR), skilled delivery, antenatal care (ANC), linking pregnant women with health facilities for delivery, delays on maternal health services and community relationships with health extension workers and health sector (Table 1).

Table 1: Characteristics of included studies for review

| Category                                  | Sub-category                                 | Frequency | Percentage (%) |
|-------------------------------------------|----------------------------------------------|-----------|----------------|
| Study design                              | Cross-sectional                              | 3         | 33.33          |
|                                           | Case-control                                 | 2         | 22.22          |
|                                           | Qualitative                                  | 4         | 44.44          |
| Year of publication                       | 2015                                         | 2         | 22.22          |
|                                           | 2016                                         | 3         | 33.33          |
|                                           | 2017                                         | 3         | 33.33          |
|                                           | 2018                                         | 1         | 11.11          |
| Addressed maternal and child health issue | Skilled maternal health service use          | 3         | 33.33          |
|                                           | Relationship of community with health sector | 3         | 33.33          |
|                                           | Child immunization                           | 1         | 11.11          |
|                                           | Maternal mortality                           | 1         | 11.11          |
|                                           | BPCR                                         | 1         | 11.11          |

## Narrative synthesis

### Participation in WDTs

We found two studies that focused on participation in WDTs. Aregawi et al,<sup>28</sup> studied 270 children ages between 9 and 23 months for immunization status with case control method. Of total 270 children 90 were in case group (children who default from immunization program) and 180 were from control group (children who have taken all recommended vaccines). Only 14 (15.6%) children from case group were from mothers who have good participation in WDT and 76 (84.4%) from poor participant mothers. Godefay et al.,<sup>29</sup> on the other hand study focused on maternal mortality. Out of 310 mothers 62 died and 248 were alive. Out of 62 dead mothers 40 (64.5%) were members of WDTs and from 248 alive mothers 197 (79.4%) were members of WDTs. This shows that more women (30.7%) who died and less women (22.6%) who were alive were not members of WDTs. In both categories, the majority of the mothers were members of WDTs. However, the proportion of alive mothers outweigh the dead ones.

Results from statistical analysis revealed that participation in WDTs has positive effect on both child immunization and maternal survival. Poor participation in women's developmental groups [AOR = 3.3,95%CI 1.54±7.08] is a determinant for defaulting immunization among children aged between 9 and 23 months. Similarly, women who were not members of the voluntary women's development army were more likely to experience maternal death [OR 2.07, 95%CI 1.04–4.11] (Table 2).

Table 2: Evidence summary of the effect of participation in women's development group on maternal and child health service

| Author, year                                        | Target population                     | Study design | Outcome                                                               | Result                                                                                 |
|-----------------------------------------------------|---------------------------------------|--------------|-----------------------------------------------------------------------|----------------------------------------------------------------------------------------|
| Aregawi HG, Gebrehiwot TG et al, 2017 <sup>28</sup> | Children aged between 9 and 23 months | Case control | Default from immunization among children aged between 9 and 23 months | Poor participation in WDGs (AOR = 3.3,95%CI 1.54±7.08) is a determinant for defaulting |

|                                                    |                                         |                 |                    |                                                                                                                           |
|----------------------------------------------------|-----------------------------------------|-----------------|--------------------|---------------------------------------------------------------------------------------------------------------------------|
| Godefay H,<br>Byass P et al,<br>2015 <sup>29</sup> | Mothers in<br>reproductive<br>age group | Case<br>control | Maternal mortality | Women who were not<br>members of WDG were<br>more likely to<br>experience maternal<br>death (OR 2.07, 95%CI<br>1.04–4.11) |
|----------------------------------------------------|-----------------------------------------|-----------------|--------------------|---------------------------------------------------------------------------------------------------------------------------|

### Distance of WDTs from health facility

In relation to the distance of WDTs from health facility, we have found two studies by Negero MG. et al<sup>30</sup> and Girmaye M. and Berhan Y.<sup>31</sup> The first study has evaluated skilled delivery attendance and the second one ANC service use. Both studies totally assessed 748 reproductive-age women who gave birth in 1 year preceding the study in 380 clusters of WDT. In the study by Negero MG. et al,<sup>30</sup> 336 (45%) of women have received skilled delivery care. While 531 (71%) of the participants received skilled ANC service at least once, as indicated in the other study.<sup>31</sup> In both studies a significant heterogeneity was observed between WDT (clusters) for skilled delivery care service utilization which explains about 62% of the total variation. Even if the distance of WDTs within 2 km radius from the nearest health facility was in both studies, the adjusted odds ratio result has shown strong association with ANC service utilization [AOR=8.28; 95%CI, 1.08-62.20] as compared to skilled delivery care [AOR (95% CI) 6.03 (1.92, 18.93)] (Table 3).

Table 3: Evidence summary of the effect of women's development groups' distance from health facility on maternal health service

| Author, year                                          | Target population                                         | Study design        | Outcome                                 | Result                                                                                              |
|-------------------------------------------------------|-----------------------------------------------------------|---------------------|-----------------------------------------|-----------------------------------------------------------------------------------------------------|
| Negero MG,<br>Mitike YB, et al,<br>2018 <sup>30</sup> | Reproductive-<br>age women<br>who gave birth<br>in 1 year | Cross-<br>sectional | Skilled delivery<br>service utilization | The distance of WDTs<br>within 2 km radius from<br>the nearest health<br>facility was significantly |

|                                              |                                                                     |                 |                                    |                                                                                                                                                                |
|----------------------------------------------|---------------------------------------------------------------------|-----------------|------------------------------------|----------------------------------------------------------------------------------------------------------------------------------------------------------------|
|                                              | preceding the study                                                 |                 |                                    | associated with skilled delivery service use [AOR (95% CI) 6.03 (1.92, 18.93)]                                                                                 |
| Girmaye M. and Berhan Y., 2016 <sup>31</sup> | Reproductive-age women who gave birth in 1 year preceding the study | Cross-sectional | Skilled antenatal care utilization | Distance of WDT within 2 km radius from the nearest health facility was significant predictor of skilled ANC service utilization [AOR=8.28; 95%CI, 1.08-62.20] |

### Effective functioning of WDTs

When WDTs and one-to-five connections perform what they are intended to do effectively, good improvements were seen. In a study by Zepre K. and Kaba M.,<sup>32</sup> birth preparedness and complication readiness of pregnant women was assessed. From 454 pregnant women, 44 were members of one-to-five connections. Sixty eight percent got information from their network and prepared for birth and its complications as compared to 34% among non members. There was also a statistically significant association between effective information delivery in one-to-five connection and BPCR [OR 2.52, 95% CI 1.17, 5.39]. Whereas, performance of WDTs has no significant effect on skilled delivery service and ANC service utilization in two studies by Negero MG. et al<sup>30</sup> and Girmaye M. and Berhan Y.<sup>31</sup>

A strong and functional relationship between WDTs and HEWs is one aspect of good functioning WDT. Regarding this we have reviewed four studies. A study by Jackson R. and Hailemariam A.<sup>33</sup> has assessed the role of HEWs in linking pregnant women with health facilities for delivery. Two studies by Jackson R., Tesfay FH. et al<sup>34,35</sup> aimed to document the factors that hinder or enable strategies to reduce the first and second delays of the three delays in rural and pastoralist areas in Ethiopia; and exploring health extension workers' and mothers' attitudes to maternal health service



utilization and acceptance. Another study by Kok MC. et al.<sup>36</sup> has addressed health extension workers' relationships with the community and health sector in Ethiopia: opportunities for enhancing maternal health performance.

A well established WDA structure has facilitated the linkage and relationship between the health system and mothers.<sup>33-36</sup> Support from a well established WDTs enabled HEWs to effectively refer more women to give birth in health facilities. Moreover, initiatives to reduce delays in maternal health service use were effective with the support of WDTs. HEWs easily get information about the date of delivery of each member of women in the community through HDTs so that, they facilitate transportation and additional services to a health facility.<sup>34,35</sup> These relationships have increased skilled birth attendance in many parts of the country. In general, WDTs are serving as a liaising agent in the community to link the health system with mothers and children in the community.<sup>35,36</sup> (Table 4).

Table 4: Summary of evidence in the effect of women's development army's effective functioning on maternal health services

| Author, year                                      | Target population | Study design    | Outcome                                                    | Result                                                                                                                                              |
|---------------------------------------------------|-------------------|-----------------|------------------------------------------------------------|-----------------------------------------------------------------------------------------------------------------------------------------------------|
| Zepre K and Kaba M, 2017 <sup>32</sup>            | Pregnant women    | Cross-sectional | Birth preparedness and complication readiness              | Those who got information from their one-to-five connections are more likely to prepare for birth and its complications (OR 2.52, 95%CI 1.17, 5.39) |
| Jackson R. and Hailemariam A., 2016 <sup>33</sup> | Pregnant women    | Qualitative     | Linking pregnant women with health facilities for delivery | HEWs can effectively refer more women to give birth in health                                                                                       |

|                                                  |                  |             |                                                       |                                                                                                                             |
|--------------------------------------------------|------------------|-------------|-------------------------------------------------------|-----------------------------------------------------------------------------------------------------------------------------|
|                                                  |                  |             |                                                       | facilities when the WDA is well functioning.                                                                                |
| Jackson R., Tesfay FH. et al, 2017 <sup>34</sup> | Pregnant women   | Qualitative | Delays in maternal health service use                 | Initiatives to reduce delays can improve access to maternal health services, especially when HEWs are supported by the WDA. |
| Jackson R., Tesfay FH. et al, 2016 <sup>35</sup> | Mothers and HEWs | Qualitative | Maternal health service utilization and acceptance    | With the support of WDGs, HEWs have increased the rate of skilled birth attendance                                          |
| Kok MC., Kea AZ; et al., 2015 <sup>36</sup>      | Mothers and HEWs | Qualitative | Relationship of community with HEWs and Health sector | The WDA supported HEWs in liaising with community members                                                                   |

## Discussion

The main objective of this systematic review was to identify, appraise and synthesize studies that reported on the contribution of Ethiopian innovative women's voluntary health intervention's (women's development army's) contribution to maternal and child health development. The major activity of this structure is supporting the primary health care intervention under the health extension program.<sup>37,38</sup> Most probably this is the first systematic review that synthesized information on women's development army and its contribution. Nine studies were assessed and all of them revealed that women's development army has contributed for the improved maternal and child health, and health service use. The evidence have shown that the benefit of WDA was obtained through participation in the group,<sup>28,29</sup> closeness of the groups to health facilities<sup>30,31</sup> and their effective functioning.<sup>32-36</sup>

Despite the fact that Ethiopian female community health intervention has special features, unpaid community health intervention has been used in various countries to improve population's health.<sup>15</sup> As various findings indicated it is a cost-effective measure, especially in low income countries with low access to health services. They applied this strategy to curbe the disastrous shortfalls in the health workforce and to improve community ownership.<sup>39-42</sup>

Women in a village level are expected to be a part and actively participate in to one-to-five connection under the WDTs. By doing so they can easily obtain information, care and support from the primary health care structure.<sup>16,21</sup> Involving community members in health services brings about an improvement of health service use and health status of the community.<sup>10,43,44</sup> Low level of default from immunization was found among children whose mothers have good experience of participating in WDTs. Those who were not members of WDTs are more than three times more likely to default from the service as compared to those included.<sup>28</sup> Community involvement in vaccination programs for children was found effective in many low and middle income countries.<sup>45,46</sup> For example, two systematic reviews focused on low income population revealed, participation of community health workers has improved child immunization.<sup>47,48</sup> Their involvement lets the community participate in decision making and improves their knowledge, so that ownership improved.<sup>49</sup>

Participation in WDTs in Ethiopia minimized maternal deaths. Women who are not members of WDTs are two times at risk of experiencing maternal death in the study area.<sup>29</sup> Participating

1  
2  
3 community members has a positive effect on mothers' survival.<sup>50</sup> Moreover, the Ethiopian WDT  
4 involvement resulted in improved birth preparedness and complication readiness.<sup>32</sup> Community  
5 health participation in India has also significantly minimized maternal death.<sup>51</sup> This implied those  
6 who took part in promoting health with WDTs could improve their health literacy and developed  
7 a good attitude towards the use of maternal health services.  
8  
9

10  
11  
12 The other major issues regarding WDA's contribution to maternal health and health service use is  
13 the distance from health facilities in reference to their meeting area. When the distance became  
14 beyond two kilometers from the nearest health center or hospital, members were less likely to use  
15 ANC and delivery service as compared to their counterparts.<sup>30,31</sup> As the meeting area of WDTs  
16 became nearer to health facilities, HEWs and health professionals from health facility can easily  
17 supervise and support the members during their meeting. Even if many national and international  
18 policy documents have given due concern for physical access to improve maternal health service  
19 use,<sup>14,52,53</sup> still the problem prevails in many low and middle-income countries.<sup>54-57</sup> This concern  
20 is also experienced by WDTs in Ethiopia.  
21  
22  
23  
24  
25  
26  
27

28  
29 Although there is some information that revealed the performance of WDTs does not have  
30 anything in improving maternal health service use,<sup>30,31</sup> there are an ample of evidence that showed  
31 effective functioning and well performing of these groups resulted in improved maternal health  
32 and health service use.<sup>32-36</sup> In the previous studies, performance of the groups was measured by  
33 traditional ways of performance measurement at the village level. The performance measurement  
34 ways, measurement indicators, and evaluators may not be effective in measuring the actual  
35 performance of the groups. Other evidence revealed that well-performing WDTs facilitated the  
36 linkage between mothers and the primary health care system. As a result, service utilization and  
37 acceptance were improved.<sup>33-35</sup> Although the performance measurement ways differ in diverse  
38 settings, good performing community health interventions succeeded in improving maternal and  
39 child health development in low-income countries.<sup>58-60</sup> As a result, countries tend to improve the  
40 performance of their community health practitioners.<sup>61,62</sup> These findings add to the growing body  
41 of evidence that health workers at the community level can work with women's groups to improve  
42 maternal health, thus reducing the need for emergency obstetric care in low-income countries.  
43  
44  
45  
46  
47  
48  
49  
50  
51

52  
53 On top of this, strongly operating WDTs and their linkage with the primary health care system  
54 ease the health service practitioners, especially HEWs effort to refer significant amount of women  
55  
56  
57

1  
2  
3 to give birth in health facilities.<sup>33</sup> HEWs are required to deliver health information and other health  
4 service packages to the community.<sup>63,64</sup> These health workers are using the WDA structure as a  
5 perfect strategy to share information and create linkage with the community members at the  
6 household and individual level.<sup>36</sup> By doing so they could deliver the services effectively.  
7  
8 Moreover, this voluntary system is serving as an initiative to reduce delays in maternal health  
9 services use.<sup>34</sup>  
10  
11  
12  
13

14 Several improvements were exhibited on maternal and child health indicators in Ethiopia in the  
15 past decade. Even though we can not hide the contribution of other interventions for the  
16 achievements, WDA's contribution has accelerated the improvements.  
17  
18

### 19 **Limitations of the Review**

20  
21 A potential limitation of the present review might be, we have not conducted meta-analysis due to  
22 heterogeneous types of study designs and population included in this review. Furthermore, we  
23 have included only full-text articles found free online.  
24  
25  
26

### 27 **Conclusions**

28  
29 The results from the review have indicated that the WDA structure has contributed for the  
30 improvement of maternal and child health and service use in many ways. Being a member of a  
31 WDG and one-to-five connection under the group, has a positive effect on child immunization  
32 service use, minimizing maternal mortality, birth preparedness and complication readiness, skilled  
33 delivery, skilled ANC and minimizing delays to use maternal health service. Moreover, it was  
34 found an effective and efficient mechanism to share information to the community as well as to  
35 create links between the communities and the primary health care system.  
36  
37  
38  
39  
40  
41

### 42 **Implication for practice**

43  
44 The government is required to continue the existing achievements regarding WDA's contribution  
45 for maternal and child health services utilization. Again responsible bodies at each level in the  
46 structure of Ethiopian health care system have to extend the benefits from WDA to other health  
47 issues in addition to the maternal and child health.  
48  
49  
50

51  
52 Periodic measurement and improvement of performance advances the benefit of WDTs to  
53 maternal and child health and service use.  
54  
55  
56  
57  
58  
59

1  
2  
3 Since the distance of existing WDTs from health facilities is an important determinant for maternal  
4 health service utilization, the government is supposed to establish new health facilities as near as  
5 possible to the population and organize the community living around health facilities into WDTs.  
6 Government also should improve other infrastructure like all weather roads, and transportation.  
7  
8 Moreover, HEWs and health professionals from health facilities are expected to support and  
9 supervise WDTs far away from health facilities.  
10  
11  
12

### 13 14 **Implications for research**

15  
16 Although there are some studies regarding WDA, still there is a paucity of literatures. Therefore,  
17 researchers are responsible to conduct various inquiries on the issue.  
18

19  
20 Moreover, researchers are supposed to examine the WDA's contribution to other health issues in  
21 addition to maternal and child health service use.  
22  
23

24 **Funding statement:** This work was supported by the Alliance for Health Policy and Systems  
25 Research/WHO Geneva (Grant Number SRC – Ethiopia 2016/659070-0).  
26  
27

28  
29 **A competing interest's statement:** The authors declare that they have no conflict of interest.  
30

31 **Author Contributions:** KY and MS conceived the papers, and written protocol for the systematic  
32 review. KY and GA searched articles, extracted data, analyzed data, drafted the first version of  
33 this paper and finalized the final version. KY, GA and MS have written and revised the manuscript.  
34  
35  
36

37 **A patient consent form:** not required  
38  
39

40 **Data statement:** all relevant data are provided in the paper and supplementary files. Additional  
41 details can be provided by the author on request.  
42  
43  
44

45 **Acknowledgements:** This review question was raised by Federal Ministry of Health, Ethiopia  
46  
47  
48  
49  
50  
51  
52  
53  
54  
55  
56  
57  
58  
59  
60

## References

1. Glenton C, Scheel IB, Pradhan S, Lewin S, Hodgins S, Shrestha V. The female community health volunteer programme in Nepal: Decision makers' perceptions of volunteerism, payment and other incentives. *Soc Sci Med.* 2010;70(12):1920-1927. doi:10.1016/j.socscimed.2010.02.034
2. Hadi A. Management of acute respiratory infections by community health volunteers: Experience of Bangladesh Rural Advancement Committee (BRAC). *Bull World Health Organ.* 2003;81(3):183-189. doi:10.1016/S0140-6736(04)17312-1
3. Lewin S, Munabi-Babigumira S, Glenton C, et al. Lay health workers in primary and community health care for maternal and child health and the management of infectious diseases. *Cochrane Database Syst Rev.* 2010;3(3):CD004015. doi:10.1002/14651858.CD004015.pub3.www.cochranelibrary.com
4. Lewin S, Dick J, Pond P, et al. Lay health workers in primary and community health care. *Cochrane Database Syst Rev.* 2005;004015. doi:10.1002/14651858.CD004015.pub2
5. Hsien M, Chung L, Hazmi H, Cheah WL. Role Performance of Community Health Volunteers and Its Associated Factors in Kuching District , Sarawak. *J Environ Public Health.* 2017;2017(9610928). <https://doi.org/10.1155/2017/9610928%0AResearch>.
6. Cueto M. The origins of primary health care and selective primary health care. *Am J Public Health.* 2004;94(11):1864-1874. doi:10.2105/AJPH.94.11.1864
7. Kuule Y, Dobson AE, Woldeyohannes D, et al. Community Health Volunteers in Primary Healthcare in Rural Uganda: Factors Influencing Performance. *Front Public Heal.* 2017;5(March):1-8. doi:10.3389/fpubh.2017.00062
8. Weidert K, Gessesew A, Bell S, Godefay H, Prata N. Community Health Workers as Social Marketers of Injectable Contraceptives: A Case Study from Ethiopia. *Glob Heal Sci Pract.* 2017;5(1):44-56. doi:10.9745/GHSP-D-16-00344
9. Sudhakar M, Woldie M, Yitbarek K, Abamecha F, Tamirat A. Primary Care Systems Profiles and Performance (PRIMASYS): Ethiopian Case study. *Alliance Heal Policy Syst Res.* 2017. doi:10.1186/1478-4491-11-39.12

10. Banteyerga H. Ethiopia ' s Health Extension Program: Improving Health through Community Involvement. *MEDICC Rev.* 2011;13(3):46-49.
11. Wang H, Tesfaye R, Ramana GN V, Chekagn CT. *Ethiopia Health Extension Program.* Publishing and Knowledge Division, The World Bank; 2016. doi:10.1596/978-1-4648-0815-9
12. Betemariam W, Zigene ZD, Fesseha N, Karim AM. Correlates of the Women ' s Development Army strategy implementation strength with household reproductive , maternal , newborn and child healthcare practices : a cross-sectional study in four regions of Ethiopia. *BMC Pregnancy Childbirth.* 2017;18(373). doi:10.1016/j.aogh.2017.03.051
13. Selamu M, Asher L, Hanlon C, et al. Beyond the biomedical: Community resources for mental health care in rural Ethiopia. *PLoS One.* 2015;10(5):1-14. doi:10.1371/journal.pone.0126666
14. Ethiopian Federal Minstry of Health. *Health Sector Transformation Plan (2015/16 - 2019/20).* Addis Ababa, Ethiopia; 2015. <https://searchworks.stanford.edu/view/11700944>.
15. Betemariam W, Damtew Z, Tesfaye C, Fesseha N, Karim AM. Effect of Ethiopia ' s Health Development Army on maternal and newborn health care practices: A multi-level cross-sectional analysis. *Ann Glob Heal.* 2017;83(1):24. doi:10.1016/j.aogh.2017.03.051
16. Maes K, Closser S, Vorel E, Tesfaye Y. Using community health workers: Discipline and hierarchy in Ethiopia ' s women ' s development army Ethiopia ' s women ' s development army. *Ann Anthropol Pract.* 2015;39(1):42-57. doi:10.1111/napa.12064
17. Central Statistical Agency [Ethiopia] and ICF International. *Ethiopia Demographic and Health Survey 2016.*; 2016. <https://dhsprogram.com/pubs/pdf/FR328/FR328.pdf>.
18. Central Statistical Authority [Ethiopia], ORC Macro. *Ethiopia Demogeraphic and Health Survey 2011.*; 2011. doi:10.1037/0022-006X.73.3.506
19. Central Statistical Authority [Ethiopia], ORC Macro. *Ethiopia Demographic and Health Survey 2000.*; 2000.
20. Central Statistical Authority [Ethiopia], ORC Macro. *Ethiopia Demographic and Health Survey 2005.*; 2006.



- 1  
2  
3 21. Maes K, Closser S, Vorel E, Tesfaye Y. A Women's Development Army: Narratives of  
4 Community Health Worker Investment and Empowerment in Rural Ethiopia. *Stud Comp*  
5 *Int Dev*. 2015;50(4):455-478. doi:10.1007/s12116-015-9197-z  
6  
7
- 8  
9 22. George AS, Mehra V, Scott K, Sriram V. Community participation in health systems  
10 research: A systematic review assessing the state of research, the nature of interventions  
11 involved and the features of engagement with communities. *PLoS One*. 2015;10(10):1-25.  
12 doi:10.1371/journal.pone.0141091  
13  
14
- 15  
16 23. The Joanna Briggs Institute. *Checklist for Analytical Cross Sectional Studies.*; 2017.  
17
- 18 24. The Joanna Briggs Institute. *Checklist for Case Control Studies.*; 2017.  
19
- 20 25. The Joanna Briggs Institute. *Checklist for Qualitative Research.*; 2017.  
21  
22
- 23 26. Madisch I, Hofmayer S, Fickenscher H. Research-Gate authors page.  
24
- 25 27. VON Programs and Services. Principles of Primary Health Care.  
26 <http://www.von.ca/en/principles-primary-health-care>. Published 2018. Accessed February  
27 20, 2010.  
28  
29
- 30  
31 28. Aregawi HG, Gebrehiwot TG, Abebe YG, Meles KG, Wuneh AD. Determinants of  
32 defaulting from completion of child immunization in Laelay Adiabo District, Tigray  
33 Region, Northern Ethiopia: A case-control study. *PLoS One*. 2017;12(9):1-13.  
34 doi:10.1371/journal.pone.0185533  
35  
36
- 37  
38 29. Godefay H, Byass P, Graham WJ, Kinsman J, Mulugeta A. Risk factors for maternal  
39 mortality in rural Tigray, Northern Ethiopia: A case-control study. *PLoS One*.  
40 2015;10(12):1-12. doi:10.1371/journal.pone.0144975  
41  
42
- 43  
44 30. Negero MG, Mitike YB, Worku AG, Abota TL. Skilled delivery service utilization and its  
45 association with the establishment of Women's Health Development Army in Yeky  
46 district, South West Ethiopia: a multilevel analysis. *BMC Res Notes*. 2018;11(1):83.  
47 doi:10.1186/s13104-018-3140-0  
48  
49
- 50  
51 31. Girmaye M, Berhan Y. Skilled Antenatal Care Service Utilization and Its Association with  
52 the Characteristics of Women's Health Development Team in Yeky District, South-West  
53 Ethiopia: A Multilevel Analysis. *Ethiop J Health Sci*. 2016;26:369-380.  
54  
55  
56  
57  
58  
59

- 1  
2  
3 doi:10.4314/ejhs.v26i4.9  
4  
5  
6 32. Zepre K, Kaba M. Birth preparedness and complication readiness among rural women of  
7 reproductive age in Abeshige district, Guraghe zone, SNNPR, Ethiopia. *Int J Womens*  
8 *Health*. 2017;9:11-21. doi:10.2147/IJWH.S111769  
9  
10  
11 33. Jackson R, Hailemariam A. The role of health extension workers in linking pregnant  
12 women with health facilities for delivery in rural and pastoralist areas of Ethiopia. *Ethiop*  
13 *J Health Sci*. 2016;26(5):471. doi:10.4314/ejhs.v26i5.9  
14  
15  
16 34. Jackson R, Tesfay FH, Gebrehiwot TG, Godefay H. Factors that hinder or enable maternal  
17 health strategies to reduce delays in rural and pastoralist areas in Ethiopia. *Trop Med Int*  
18 *Heal*. 2017;22(2):148-160. doi:10.1111/tmi.12818  
19  
20  
21  
22 35. Jackson R, Tesfay FH, Godefay H, Gebrehiwot TG. Health extension workers' and  
23 mothers' attitudes to maternal health service utilization and acceptance in Adwa Woreda,  
24 Tigray Region, Ethiopia. *PLoS One*. 2016;11(3):1-15. doi:10.1371/journal.pone.0150747  
25  
26  
27  
28 36. Kok MC, Kea AZ, Datiko DG, et al. A qualitative assessment of health extension  
29 workers' relationships with the community and health sector in Ethiopia: Opportunities  
30 for enhancing maternal health performance. *Hum Resour Health*. 2015;13(1):1-12.  
31 doi:10.1186/s12960-015-0077-4  
32  
33  
34  
35 37. Federal Democratic Republic of Ethiopia Ministry of Health. *Health Sector Development*  
36 *Program III (2005/6-2009/10)*. Addis Ababa, Ethiopia; 2005.  
37  
38  
39 38. Federal Democratic Republic of Ethiopia Ministry of Health. *Health Sector Development*  
40 *Program IV October 2010 Contents*. Addis Ababa, Ethiopia; 2010.  
41  
42  
43 39. Gopalan SS, Mohanty S, Das A. Assessing community health workers' performance  
44 motivation: A mixed-methods approach on India's Accredited Social Health Activists  
45 (ASHA) programme. *BMJ Open*. 2012;2(5):1-10. doi:10.1136/bmjopen-2012-001557  
46  
47  
48  
49 40. Singh D, Negin J, Orach CG, Cumming R. Supportive supervision for volunteers to  
50 deliver reproductive health education: a cluster randomized trial. *Reprod Health*.  
51 2016;13(1):1-10. doi:10.1186/s12978-016-0244-7  
52  
53  
54  
55 41. Glenton C, Colvin C, Carlsen B, et al. Barriers and facilitators to the implementation of  
56  
57  
58  
59  
60

- lay health worker programmes to improve access to maternal and child health: Qualitative evidence synthesis. *Cochrane Database Syst Rev*. 2013;2013(2):326-328.  
doi:10.1080/00222338808053404
42. Panday S, Bissell P, Van Teijlingen E, Simkhada P. The contribution of female community health volunteers (FCHVs) to maternity care in Nepal: A qualitative study. *BMC Health Serv Res*. 2017;17(1):1-11. doi:10.1186/s12913-017-2567-7
43. World Health Organization. Community involvement in health development: challenging health services, report of a WHO study group [meeting in Geneva from 11 to 18 December 1989]. *WHO Tech Rep Ser*. 1991;(809):56 p.
44. Hitchcock JM. Providing health care: community agency involvement. *Bull Am Coll Nurse Midwives*. 1971;16(1):12-18. doi:10.1111/j.1542-2011.1971.tb00056.x
45. Suryadevara M, Bonville CA, Ferraioli F, Domachowske JB. Community-Centered Education Improves Vaccination Rates in Children From Low-Income Households. *Pediatrics*. 2013;132(2):319-325. doi:10.1542/peds.2012-3927
46. Kawakatsu Y, Tanaka J, Ogawa K, Ogendo K, Honda S. Effects of three interventions and determinants of full vaccination among children aged 12-59 months in Nyanza province, Kenya. *Public Health*. 2015;129(11):1530-1538. doi:10.1016/j.puhe.2015.07.008
47. Lewin S, Munabi-Babigumira S, Glenton C, et al. Lay health workers in primary and community health care for maternal and child health and the management of infectious diseases. [Review] [246 refs][Update of Cochrane Database Syst Rev. 2005;(1):CD004015; PMID: 15674924]. *Cochrane database Syst Rev*. 2010;(3). doi:10.1002/14651858.CD004015.pub3
48. Glenton C, Scheel IB, Lewin S, Swingler GH. Can lay health workers increase the uptake of childhood immunisation? Systematic review and typology. *Trop Med Int Heal*. 2011;16(9):1044-1053. doi:10.1111/j.1365-3156.2011.02813.x
49. Saeterdal I, Lewin S, Austvoll-Dahlgren A, Glenton C, Munabi-Babigumira S. Interventions aimed at communities to inform and/or educate about early childhood vaccination. *Cochrane Database Syst Rev*. 2014;2014(11). doi:10.1002/14651858.CD010232.pub2

- 1  
2  
3 50. Rai S, Misra P, Upadhyay R, Anand K, Kant S. Public health approach to address  
4 maternal mortality. *Indian J Public Health*. 2012;56(3):196. doi:10.4103/0019-  
5 557X.104231  
6  
7  
8  
9 51. Charanthimath U, Vidler M, Katageri G, et al. The feasibility of task-sharing the  
10 identification, emergency treatment, and referral for women with pre-eclampsia by  
11 community health workers in India. *Reprod Health*. 2018;15(101):77-86.  
12 doi:10.1186/s12978-018-0532-5  
13  
14  
15  
16 52. World Health Organization/United Nations Childrens Fund. WHO/UNICEF Joint  
17 statement: Home visits for the newborn child: a strategy to improve survival. *WHO Libr*.  
18 2009:1-8.  
19  
20  
21  
22 53. World Health Organization. *WHO Recommendations on Interventions to Improve Preterm*  
23 *Birth Outcomes.*; 2015.  
24  
25  
26 54. Keya KT, Rob U, Rahman MM, Bajracharya A, Bellows B. Distance, Transportation  
27 Cost, and Mode of Transport in the Utilization of Facility-Based Maternity Services:  
28 Evidence from Rural Bangladesh. *Int Q Community Health Educ*. 2014;35(1):37-51.  
29 doi:10.2190/IQ.35.1.d  
30  
31  
32  
33 55. Gage AJ, Guirlène Calixte M. Effects of the physical accessibility of maternal health  
34 services on their use in rural Haiti. *Popul Stud (NY)*. 2006;60(3):271-288.  
35 doi:10.1080/00324720600895934  
36  
37  
38  
39 56. Ebu NI, Gross J. Factors influencing access to antenatal services and delivery care in sub-  
40 Saharan Africa. *Afr J Midwifery Womens Health*. 2015;9(2):58-65.  
41 doi:10.12968/ajmw.2015.9.2.58  
42  
43  
44  
45 57. Keya KT, Rahman MM, Rob U, Bellows B. Distance travelled and cost of transport for  
46 use of facility-based maternity services in rural Bangladesh: a cross-sectional survey.  
47 *Lancet*. 2013;382:17. doi:10.1016/S0140-6736(13)62178-9  
48  
49  
50  
51 58. Kawakatsu Y, Sugishita T, Oruenjo K, et al. Determinants of health facility utilization for  
52 childbirth in rural western Kenya: Cross-sectional study. *BMC Pregnancy Childbirth*.  
53 2014;14(1). doi:10.1186/1471-2393-14-265  
54  
55  
56 59. Saprii L, Richards E, Kokho P, Theobald S. Community health workers in rural India:  
57  
58  
59  
60

- 1  
2  
3  
4  
5  
6  
7  
8  
9  
10  
11  
12  
13  
14  
15  
16  
17  
18  
19  
20  
21  
22  
23  
24  
25  
26  
27  
28  
29  
30  
31  
32  
33  
34  
35  
36  
37  
38  
39  
40  
41  
42  
43  
44  
45  
46  
47  
48  
49  
50  
51  
52  
53  
54  
55  
56  
57  
58  
59  
60
- Analysing the opportunities and challenges Accredited Social Health Activists (ASHAs) face in realising their multiple roles. *Hum Resour Health*. 2015;13(1):1-13. doi:10.1186/s12960-015-0094-3
60. Wilford A, Phakathi S, Haskins L, Jama NA, Mntambo N, Horwood C. Exploring the care provided to mothers and children by community health workers in South Africa: Missed opportunities to provide comprehensive care. *BMC Public Health*. 2018;18(1):1-10. doi:10.1186/s12889-018-5056-y
61. O'Donovan J, O'Donovan C, Kuhn I, Sachs SE, Winters N. Ongoing training of community health workers in low-income and middle-income countries: a systematic scoping review of the literature. *BMJ Open*. 2018;8(4):e021467. doi:10.1136/bmjopen-2017-021467
62. Ballard M, Montgomery P. Systematic review of interventions for improving the performance of community health workers in low-income and middle-income countries. *BMJ Open*. 2017;7(10). doi:10.1136/bmjopen-2016-014216
63. Wakabi W. Extension workers drive Ethiopia's primary health care. *Lancet*. 2008;372(9642):880. doi:10.1016/S0140-6736(08)61381-1
64. World Health Organization, Global Health Workforce Alliance. Country Case Study: Ethiopia's human resources for health program. *Heal (San Fr)*. 2008:1-7.

1  
2  
3 Figure legend:  
4

5 Figure 1: Literature search and screening  
6  
7  
8  
9  
10  
11  
12  
13  
14  
15  
16  
17  
18  
19  
20  
21  
22  
23  
24  
25  
26  
27  
28  
29  
30  
31  
32  
33  
34  
35  
36  
37  
38  
39  
40  
41  
42  
43  
44  
45  
46  
47  
48  
49  
50  
51  
52  
53  
54  
55  
56  
57  
58  
59  
60

For peer review only

1  
2  
3  
4  
5  
6  
7  
8  
9  
10  
11  
12  
13  
14  
15  
16  
17  
18  
19  
20  
21  
22  
23  
24  
25  
26  
27  
28  
29  
30  
31  
32  
33  
34  
35  
36  
37  
38  
39  
40  
41  
42  
43  
44  
45  
46  
47  
48  
49  
50  
51  
52  
53  
54  
55  
56  
57  
58  
59  
60



Literature search and screening  
90x90mm (300 x 300 DPI)

**Supplementary file I: Search strategy**

| Search | Query                                                                                                                                                                                                   |
|--------|---------------------------------------------------------------------------------------------------------------------------------------------------------------------------------------------------------|
| #1     | Search (((((((community health workers) OR community volunteer) OR women's development army) OR women's development team) OR health development team) OR lay health workers) OR health development army |
| #2     | Search (((maternal health) OR maternal health service) OR child health) OR child health service) OR health                                                                                              |
| #3     | Search Ethiopia                                                                                                                                                                                         |
| #4     | #1 AND #2 AND #3                                                                                                                                                                                        |
| #5     | Limit to: Full text                                                                                                                                                                                     |
| #6     | Limit to: Publication date from 2010/01/01 to 2018/12/31                                                                                                                                                |
| #7     | Limit to: English language                                                                                                                                                                              |



## Supplementary file II: Critical appraisal result

### Case control

| Studies                                | Q1 | Q2 | Q3 | Q4 | Q5 | Q6 | Q7 | Q8 | Q9 | Q10 | Total      |
|----------------------------------------|----|----|----|----|----|----|----|----|----|-----|------------|
| Aregawi HG. et al <sup>18</sup>        | U  | Y  | Y  | Y  | Y  | Y  | Y  | Y  | U  | Y   | 8 Y<br>2 U |
| Godefay H, Byass P et al <sup>19</sup> | U  | Y  | Y  | Y  | Y  | Y  | Y  | Y  | U  | Y   | 8 Y<br>2 U |

### Cross-sectional

| Studies                                | Q1 | Q2 | Q3 | Q4 | Q5 | Q6 | Q7 | Q8 | Total             |
|----------------------------------------|----|----|----|----|----|----|----|----|-------------------|
| Haile F. et al <sup>43</sup>           | Y  | Y  | N  | Y  | Y  | Y  | U  | Y  | 5 Y<br>2 N<br>1 U |
| Negero MG. et al <sup>20</sup>         | Y  | Y  | U  | Y  | Y  | Y  | Y  | Y  | 7 Y<br>1 U        |
| Zepre K. et al <sup>22</sup>           | Y  | Y  | Y  | Y  | Y  | Y  | U  | Y  | 7 Y<br>1 U        |
| Girmaye M. and Berhan Y. <sup>21</sup> | Y  | Y  | Y  | Y  | Y  | Y  | U  | Y  | 7 Y<br>1 U        |

### Qualitative

| Studies                     | Q1 | Q2 | Q3 | Q4 | Q5 | Q6 | Q7 | Q8 | Q9 | Q10 | Total             |
|-----------------------------|----|----|----|----|----|----|----|----|----|-----|-------------------|
| Banteyerga H. <sup>44</sup> | Y  | U  | Y  | Y  | Y  | N  | N  | Y  | N  | Y   | 6 Y<br>3 N<br>1 U |
| Maes K. et al <sup>15</sup> | U  | U  | U  | U  | U  | N  | N  | Y  | Y  | U   | 2 Y<br>2 N<br>6 U |
| Sako B. et al <sup>45</sup> | Y  | Y  | Y  | Y  | Y  | N  | N  | Y  | Y  | Y   | 8 Y<br>2 N        |

|                                                            |   |   |   |   |   |   |   |   |   |   |                   |
|------------------------------------------------------------|---|---|---|---|---|---|---|---|---|---|-------------------|
| Jackson R., Hailemariam A. et al. <sup>23</sup>            | U | Y | Y | Y | Y | N | N | Y | Y | Y | 7 Y<br>2 N<br>1 U |
| Jackson R., Tesfay FH., Gebrehiwot TG. et al <sup>24</sup> | Y | Y | Y | Y | Y | N | N | Y | Y | Y | 8 Y<br>2 N        |
| Jackson R., Tesfay FH., Godefay H. et al <sup>25</sup>     | Y | Y | Y | Y | Y | N | Y | Y | Y | Y | 9 Y<br>1 N        |
| Kok MC., Kea AZ. et al <sup>26</sup>                       | Y | Y | Y | Y | Y | N | N | Y | Y | Y | 8 Y<br>2 N        |
| Maesa K., Closser S. et al <sup>16</sup>                   | U | Y | Y | Y | Y | N | N | U | Y | Y | 6 Y<br>2 N<br>2 U |

Y: Yes; N: No; U: Unclear

1  
2  
3  
4  
5  
6  
7  
8  
9  
10  
11  
12  
13  
14  
15  
16  
17  
18  
19  
20  
21  
22  
23  
24  
25  
26  
27  
28  
29  
30  
31  
32  
33  
34  
35  
36  
37  
38  
39  
40  
41  
42  
43  
44  
45  
46  
47  
48  
49  
50  
51  
52  
53  
54  
55  
56  
57  
58  
59  
60

**Supplementary file III: Data extraction checklist**

Qualitative

| Study ID | Study Design | Population | Phenomenon of interest | Outcome | Remark |
|----------|--------------|------------|------------------------|---------|--------|
|          |              |            |                        |         |        |
|          |              |            |                        |         |        |
|          |              |            |                        |         |        |
|          |              |            |                        |         |        |

Quantitative

| Study ID | Study Design | Population | Outcome | Result | Remark |
|----------|--------------|------------|---------|--------|--------|
|          |              |            |         |        |        |
|          |              |            |         |        |        |
|          |              |            |         |        |        |
|          |              |            |         |        |        |

### Supplementary file IV: Table of included studies

| Study                                               | Purpose                                                                                                                                                        | Study design    | Participants and sample size                                                                                                                                |
|-----------------------------------------------------|----------------------------------------------------------------------------------------------------------------------------------------------------------------|-----------------|-------------------------------------------------------------------------------------------------------------------------------------------------------------|
| Aregawi HG, Gebrehiwot TG et al, 2017 <sup>18</sup> | To identify the determinants of defaulting from child immunization completion among children aged 9-23 months in the Laelay Adiabo District, North Ethiopia.   | Case-control    | 270 children aged 9-23 months <ul style="list-style-type: none"> <li>• 90 cases and</li> <li>• 180 controls</li> </ul>                                      |
| Godefay H, Byass P et al, 2015 <sup>19</sup>        | To characterize individual risk factors for maternal mortality in Tigray, Ethiopia.                                                                            | Case-control    | The sample size was 310 <ul style="list-style-type: none"> <li>• 62 cases and</li> <li>• 248 controls</li> </ul> from six randomly-selected rural districts |
| Zepre K and Kaba M, 2017 <sup>22</sup>              | To assess the current BPCR practice and determine associated factors among rural women of reproductive age in Abeshige district, Guraghe zone, SNNPR, Ethiopia | Cross-sectional | 454 women who delivered within 12 months prior to this survey                                                                                               |
| Negero MG. et al, 2018 <sup>20</sup>                | To assess Skilled delivery service utilization and its association with the establishment of Women's Health Development army                                   | Cross-sectional | 748 reproductive-age women who gave birth in 1 year preceding the study in 380 clusters of WDA were included                                                |
| Girmaye M. and Berhan Y. <sup>21</sup>              | To assess Skilled ANC service utilization and its association with the establishment of                                                                        | Cross-sectional | 748 reproductive-age women who gave birth in 1 year preceding the study                                                                                     |

|                                                   | Women's Health Development army                                                                                                                                                           |             |                                                                                                                                                                                                                                            |
|---------------------------------------------------|-------------------------------------------------------------------------------------------------------------------------------------------------------------------------------------------|-------------|--------------------------------------------------------------------------------------------------------------------------------------------------------------------------------------------------------------------------------------------|
| Jackson R. and Hailemariam A., 2016 <sup>23</sup> | To examine the barriers and facilitators for HEWs as they refer women to mid-level health facilities for birth.                                                                           | Qualitative | 45 HEWs, 14 women extension workers (employed by Afar Pastoralist Development Association, Afar Region) and 11 other health workers from health centers, hospitals or health offices.                                                      |
| Jackson R. Tesfay FH. et al, 2017 <sup>24</sup>   | To document factors that hinder or enable strategies to reduce the first and second delays of the Three Delays in rural and pastoralist areas in Ethiopia                                 | Qualitative | A key informant study was conducted with 44 HEWs in Afar, SNNP, and Tigray Regions                                                                                                                                                         |
| Jackson R. Tesfay FH. et al, 2016 <sup>25</sup>   | To explored HEWs' and mother's attitudes to maternal health services in Adwa Woreda, Tigray Region.                                                                                       | Qualitative | 45 women were interviewed                                                                                                                                                                                                                  |
| Kok MC. et al., 2015 <sup>26</sup>                | To understand how relationships between HEWs, the community and health sector were shaped, in order to inform policy on optimizing HEW performance in providing maternal health services. | Qualitative | 14 FGDs with HEWs, women and men from the community and 44 semi-structured interviews with HEWs; key informants working in program management, health service delivery and supervision of HEWs; mothers; and traditional birth attendants. |

# Reporting checklist for systematic review and meta-analysis.

Based on the PRISMA guidelines.

## Instructions to authors

Complete this checklist by entering the page numbers from your manuscript where readers will find each of the items listed below.

Your article may not currently address all the items on the checklist. Please modify your text to include the missing information. If you are certain that an item does not apply, please write "n/a" and provide a short explanation.

Upload your completed checklist as an extra file when you submit to a journal.

In your methods section, say that you used the PRISMA reporting guidelines, and cite them as:

Moher D, Liberati A, Tetzlaff J, Altman DG, The PRISMA Group. Preferred Reporting Items for Systematic Reviews and Meta-Analyses: The PRISMA Statement

|                           |                    | Reporting Item                                                                                                                                                                                                                                                                                             | Page Number |
|---------------------------|--------------------|------------------------------------------------------------------------------------------------------------------------------------------------------------------------------------------------------------------------------------------------------------------------------------------------------------|-------------|
|                           | <a href="#">#1</a> | Identify the report as a systematic review, meta-analysis, or both.                                                                                                                                                                                                                                        | 1           |
| Structured summary        | <a href="#">#2</a> | Provide a structured summary including, as applicable: background; objectives; data sources; study eligibility criteria, participants, and interventions; study appraisal and synthesis methods; results; limitations; conclusions and implications of key findings; systematic review registration number | 2           |
| Rationale                 | <a href="#">#3</a> | Describe the rationale for the review in the context of what is already known.                                                                                                                                                                                                                             | 4-5         |
| Objectives                | <a href="#">#4</a> | Provide an explicit statement of questions being addressed with reference to participants, interventions, comparisons, outcomes, and study design (PICOS).                                                                                                                                                 | 6           |
| Protocol and registration | <a href="#">#5</a> | Indicate if a review protocol exists, if and where it can be accessed (e.g., Web address) and, if available, provide registration information including the registration number.                                                                                                                           |             |

|    |                                    |                     |                                                                                                                                                                                                                                 |     |
|----|------------------------------------|---------------------|---------------------------------------------------------------------------------------------------------------------------------------------------------------------------------------------------------------------------------|-----|
| 1  | Eligibility criteria               | <a href="#">#6</a>  | Specify study characteristics (e.g., PICOS, length of follow-up) and report characteristics (e.g., years considered, language, publication status) used as criteria for eligibility, giving rational                            | 6   |
| 2  |                                    |                     |                                                                                                                                                                                                                                 |     |
| 3  |                                    |                     |                                                                                                                                                                                                                                 |     |
| 4  |                                    |                     |                                                                                                                                                                                                                                 |     |
| 5  |                                    |                     |                                                                                                                                                                                                                                 |     |
| 6  | Information sources                | <a href="#">#7</a>  | Describe all information sources in the search (e.g., databases with dates of coverage, contact with study authors to identify additional studies) and date last searched.                                                      | 6   |
| 7  |                                    |                     |                                                                                                                                                                                                                                 |     |
| 8  |                                    |                     |                                                                                                                                                                                                                                 |     |
| 9  |                                    |                     |                                                                                                                                                                                                                                 |     |
| 10 |                                    |                     |                                                                                                                                                                                                                                 |     |
| 11 | Search                             | <a href="#">#8</a>  | Present full electronic search strategy for at least one database, including any limits used, such that it could be repeated.                                                                                                   | 6   |
| 12 |                                    |                     |                                                                                                                                                                                                                                 |     |
| 13 |                                    |                     |                                                                                                                                                                                                                                 |     |
| 14 |                                    |                     |                                                                                                                                                                                                                                 |     |
| 15 | Study selection                    | <a href="#">#9</a>  | State the process for selecting studies (i.e., for screening, for determining eligibility, for inclusion in the systematic review, and, if applicable, for inclusion in the meta-analysis).                                     | 7-8 |
| 16 |                                    |                     |                                                                                                                                                                                                                                 |     |
| 17 |                                    |                     |                                                                                                                                                                                                                                 |     |
| 18 |                                    |                     |                                                                                                                                                                                                                                 |     |
| 19 |                                    |                     |                                                                                                                                                                                                                                 |     |
| 20 |                                    |                     |                                                                                                                                                                                                                                 |     |
| 21 | Data collection process            | <a href="#">#10</a> | Describe the method of data extraction from reports (e.g., piloted forms, independently by two reviewers) and any processes for obtaining and confirming data from investigators.                                               | 9   |
| 22 |                                    |                     |                                                                                                                                                                                                                                 |     |
| 23 |                                    |                     |                                                                                                                                                                                                                                 |     |
| 24 |                                    |                     |                                                                                                                                                                                                                                 |     |
| 25 |                                    |                     |                                                                                                                                                                                                                                 |     |
| 26 | Data items                         | <a href="#">#11</a> | List and define all variables for which data were sought (e.g., PICOS, funding sources), and any assumptions and simplifications made.                                                                                          |     |
| 27 |                                    |                     |                                                                                                                                                                                                                                 |     |
| 28 |                                    |                     |                                                                                                                                                                                                                                 |     |
| 29 |                                    |                     |                                                                                                                                                                                                                                 |     |
| 30 |                                    |                     |                                                                                                                                                                                                                                 |     |
| 31 | Risk of bias in individual studies | <a href="#">#12</a> | Describe methods used for assessing risk of bias in individual studies (including specification of whether this was done at the study or outcome level, or both), and how this information is to be used in any data synthesis. |     |
| 32 |                                    |                     |                                                                                                                                                                                                                                 |     |
| 33 |                                    |                     |                                                                                                                                                                                                                                 |     |
| 34 |                                    |                     |                                                                                                                                                                                                                                 |     |
| 35 |                                    |                     |                                                                                                                                                                                                                                 |     |
| 36 |                                    |                     |                                                                                                                                                                                                                                 |     |
| 37 |                                    |                     |                                                                                                                                                                                                                                 |     |
| 38 | Summary measures                   | <a href="#">#13</a> | State the principal summary measures (e.g., risk ratio, difference in means).                                                                                                                                                   |     |
| 39 |                                    |                     |                                                                                                                                                                                                                                 |     |
| 40 |                                    |                     |                                                                                                                                                                                                                                 |     |
| 41 |                                    |                     |                                                                                                                                                                                                                                 |     |
| 42 | Planned methods of analysis        | <a href="#">#14</a> | Describe the methods of handling data and combining results of studies, if done, including measures of consistency (e.g., I <sup>2</sup> ) for each meta-analysis.                                                              | 9   |
| 43 |                                    |                     |                                                                                                                                                                                                                                 |     |
| 44 |                                    |                     |                                                                                                                                                                                                                                 |     |
| 45 |                                    |                     |                                                                                                                                                                                                                                 |     |
| 46 |                                    |                     |                                                                                                                                                                                                                                 |     |
| 47 | Risk of bias across studies        | <a href="#">#15</a> | Specify any assessment of risk of bias that may affect the cumulative evidence (e.g., publication bias, selective reporting within studies).                                                                                    |     |
| 48 |                                    |                     |                                                                                                                                                                                                                                 |     |
| 49 |                                    |                     |                                                                                                                                                                                                                                 |     |
| 50 |                                    |                     |                                                                                                                                                                                                                                 |     |
| 51 |                                    |                     |                                                                                                                                                                                                                                 |     |
| 52 |                                    |                     |                                                                                                                                                                                                                                 |     |
| 53 | Additional analyses                | <a href="#">#16</a> | Describe methods of additional analyses (e.g., sensitivity or subgroup analyses, meta-regression), if done, indicating which were pre-specified.                                                                                |     |
| 54 |                                    |                     |                                                                                                                                                                                                                                 |     |
| 55 |                                    |                     |                                                                                                                                                                                                                                 |     |
| 56 |                                    |                     |                                                                                                                                                                                                                                 |     |
| 57 |                                    |                     |                                                                                                                                                                                                                                 |     |
| 58 | Study selection                    | <a href="#">#17</a> | Give numbers of studies screened, assessed for eligibility, and                                                                                                                                                                 | 7-8 |
| 59 |                                    |                     |                                                                                                                                                                                                                                 |     |
| 60 |                                    |                     |                                                                                                                                                                                                                                 |     |

included in the review, with reasons for exclusions at each stage, ideally with a flow diagram.

|    |                    |                                                                      |       |
|----|--------------------|----------------------------------------------------------------------|-------|
| 1  |                    |                                                                      |       |
| 2  |                    |                                                                      |       |
| 3  |                    |                                                                      |       |
| 4  | Study              | <a href="#">#18</a>                                                  | 10    |
| 5  | characteristics    | For each study, present characteristics for which data were          |       |
| 6  |                    | extracted (e.g., study size, PICOS, follow-up period) and provide    |       |
| 7  |                    | the citation.                                                        |       |
| 8  |                    |                                                                      |       |
| 9  | Risk of bias       | <a href="#">#19</a>                                                  |       |
| 10 | within studies     | Present data on risk of bias of each study and, if available, any    |       |
| 11 |                    | outcome-level assessment (see Item 12).                              |       |
| 12 |                    |                                                                      |       |
| 13 | Results of         | <a href="#">#20</a>                                                  | 10-14 |
| 14 | individual studies | For all outcomes considered (benefits and harms), present, for       |       |
| 15 |                    | each study: (a) simple summary data for each intervention group      |       |
| 16 |                    | and (b) effect estimates and confidence intervals, ideally with a    |       |
| 17 |                    | forest plot.                                                         |       |
| 18 |                    |                                                                      |       |
| 19 |                    |                                                                      |       |
| 20 | Synthesis of       | <a href="#">#21</a>                                                  | 10-14 |
| 21 | results            | Present the main results of the review. If meta-analyses are         |       |
| 22 |                    | done, include for each, confidence intervals and measures of         |       |
| 23 |                    | consistency.                                                         |       |
| 24 |                    |                                                                      |       |
| 25 | Risk of bias       | <a href="#">#22</a>                                                  |       |
| 26 | across studies     | Present results of any assessment of risk of bias across studies     |       |
| 27 |                    | (see Item 15).                                                       |       |
| 28 |                    |                                                                      |       |
| 29 | Additional         | <a href="#">#23</a>                                                  |       |
| 30 | analysis           | Give results of additional analyses, if done (e.g., sensitivity or   |       |
| 31 |                    | subgroup analyses, meta-regression [see Item 16]).                   |       |
| 32 |                    |                                                                      |       |
| 33 | Summary of         | <a href="#">#24</a>                                                  | 10-14 |
| 34 | Evidence           | Summarize the main findings, including the strength of evidence      |       |
| 35 |                    | for each main outcome; consider their relevance to key groups        |       |
| 36 |                    | (e.g., health care providers, users, and policy makers               |       |
| 37 |                    |                                                                      |       |
| 38 | Limitations        | <a href="#">#25</a>                                                  | 16    |
| 39 |                    | Discuss limitations at study and outcome level (e.g., risk of bias), |       |
| 40 |                    | and at review level (e.g., incomplete retrieval of identified        |       |
| 41 |                    | research, reporting bias).                                           |       |
| 42 |                    |                                                                      |       |
| 43 | Conclusions        | <a href="#">#26</a>                                                  | 15-16 |
| 44 |                    | Provide a general interpretation of the results in the context of    |       |
| 45 |                    | other evidence, and implications for future research.                |       |
| 46 |                    |                                                                      |       |
| 47 | Funding            | <a href="#">#27</a>                                                  | 17    |
| 48 |                    | Describe sources of funding or other support (e.g., supply of        |       |
| 49 |                    | data) for the systematic review; role of funders for the systematic  |       |
| 50 |                    | review.                                                              |       |
| 51 |                    |                                                                      |       |

The PRISMA checklist is distributed under the terms of the Creative Commons Attribution License CC-BY. This checklist can be completed online using <https://www.goodreports.org/>, a tool made by the [EQUATOR Network](#) in collaboration with [Penelope.ai](#)
