# Supplementary material for: Contribution of women’s development army to maternal and child health in Ethiopia: a systematic review of evidence
Source: PubMed Central journal article supplement — BMJ Open. 2019 May 22;9(5):e025937. doi: 10.1136/bmjopen-2018-025937 (PMC6538000; doi:10.1136/bmjopen-2018-025937), 2019-05-22
Supplement: bmjopen-2018-025937supp001.pdf [file bmjopen-2018-025937supp001.pdf]

## Supplementary file I: Search strategy

| Search | Query                                                                                                                                                                                                   |
|--------|---------------------------------------------------------------------------------------------------------------------------------------------------------------------------------------------------------|
| #1     | Search (((((((community health workers) OR community volunteer) OR women's development army) OR women's development team) OR health development team) OR lay health workers) OR health development army |
| #2     | Search (((maternal health) OR maternal health service) OR child health) OR child health service) OR health                                                                                              |
| #3     | Search Ethiopia                                                                                                                                                                                         |
| #4     | #1 AND #2 AND #3                                                                                                                                                                                        |
| #5     | Limit to: Full text                                                                                                                                                                                     |
| #6     | Limit to: Publication date from 2010/01/01 to 2018/12/31                                                                                                                                                |
| #7     | Limit to: English language                                                                                                                                                                              |
