# Supplementary material for: Contribution of women’s development army to maternal and child health in Ethiopia: a systematic review of evidence
Source: PubMed Central journal article supplement — BMJ Open. 2019 May 22;9(5):e025937. doi: 10.1136/bmjopen-2018-025937 (PMC6538000; doi:10.1136/bmjopen-2018-025937), 2019-05-22
Supplement: bmjopen-2018-025937supp002.pdf [file bmjopen-2018-025937supp002.pdf]

## Supplementary file II: Critical appraisal result

### Case control

| Studies                                | Q1 | Q2 | Q3 | Q4 | Q5 | Q6 | Q7 | Q8 | Q9 | Q10 | Total      |
|----------------------------------------|----|----|----|----|----|----|----|----|----|-----|------------|
| Aregawi HG. et al <sup>18</sup>        | U  | Y  | Y  | Y  | Y  | Y  | Y  | Y  | U  | Y   | 8 Y<br>2 U |
| Godefay H, Byass P et al <sup>19</sup> | U  | Y  | Y  | Y  | Y  | Y  | Y  | Y  | U  | Y   | 8 Y<br>2 U |

### Cross-sectional

| Studies                                | Q1 | Q2 | Q3 | Q4 | Q5 | Q6 | Q7 | Q8 | Total             |
|----------------------------------------|----|----|----|----|----|----|----|----|-------------------|
| Haile F. et al <sup>43</sup>           | Y  | Y  | N  | Y  | Y  | Y  | U  | Y  | 5 Y<br>2 N<br>1 U |
| Negero MG. et al <sup>20</sup>         | Y  | Y  | U  | Y  | Y  | Y  | Y  | Y  | 7 Y<br>1 U        |
| Zepre K. et al <sup>22</sup>           | Y  | Y  | Y  | Y  | Y  | Y  | U  | Y  | 7 Y<br>1 U        |
| Girmaye M. and Berhan Y. <sup>21</sup> | Y  | Y  | Y  | Y  | Y  | Y  | U  | Y  | 7 Y<br>1 U        |

### Qualitative

| Studies                     | Q1 | Q2 | Q3 | Q4 | Q5 | Q6 | Q7 | Q8 | Q9 | Q10 | Total             |
|-----------------------------|----|----|----|----|----|----|----|----|----|-----|-------------------|
| Banteyerga H. <sup>44</sup> | Y  | U  | Y  | Y  | Y  | N  | N  | Y  | N  | Y   | 6 Y<br>3 N<br>1 U |
| Maes K. et al <sup>15</sup> | U  | U  | U  | U  | U  | N  | N  | Y  | Y  | U   | 2 Y<br>2 N<br>6 U |
| Sako B. et al <sup>45</sup> | Y  | Y  | Y  | Y  | Y  | N  | N  | Y  | Y  | Y   | 8 Y<br>2 N        |

|                                                            |   |   |   |   |   |   |   |   |   |   |                   |
|------------------------------------------------------------|---|---|---|---|---|---|---|---|---|---|-------------------|
| Jackson R., Hailemariam A. et al. <sup>23</sup>            | U | Y | Y | Y | Y | N | N | Y | Y | Y | 7 Y<br>2 N<br>1 U |
| Jackson R., Tesfay FH., Gebrehiwot TG. et al <sup>24</sup> | Y | Y | Y | Y | Y | N | N | Y | Y | Y | 8 Y<br>2 N        |
| Jackson R., Tesfay FH., Godefay H. et al <sup>25</sup>     | Y | Y | Y | Y | Y | N | Y | Y | Y | Y | 9 Y<br>1 N        |
| Kok MC., Kea AZ. et al <sup>26</sup>                       | Y | Y | Y | Y | Y | N | N | Y | Y | Y | 8 Y<br>2 N        |
| Maesa K., Closser S. et al <sup>16</sup>                   | U | Y | Y | Y | Y | N | N | U | Y | Y | 6 Y<br>2 N<br>2 U |

Y: Yes; N: No; U: Unclear
