# Supplementary material for: Contribution of women’s development army to maternal and child health in Ethiopia: a systematic review of evidence
Source: PubMed Central journal article supplement — BMJ Open. 2019 May 22;9(5):e025937. doi: 10.1136/bmjopen-2018-025937 (PMC6538000; doi:10.1136/bmjopen-2018-025937), 2019-05-22
Supplement: bmjopen-2018-025937supp003.pdf [file bmjopen-2018-025937supp003.pdf]

**Supplementary file III: Data extraction checklist**

Qualitative

| <b>Study ID</b> | <b>Study Design</b> | <b>Population</b> | <b>Phenomenon of interest</b> | <b>Outcome</b> | <b>Remark</b> |
|-----------------|---------------------|-------------------|-------------------------------|----------------|---------------|
|                 |                     |                   |                               |                |               |
|                 |                     |                   |                               |                |               |
|                 |                     |                   |                               |                |               |
|                 |                     |                   |                               |                |               |

Quantitative

| <b>Study ID</b> | <b>Study Design</b> | <b>Population</b> | <b>Outcome</b> | <b>Result</b> | <b>Remark</b> |
|-----------------|---------------------|-------------------|----------------|---------------|---------------|
|                 |                     |                   |                |               |               |
|                 |                     |                   |                |               |               |
|                 |                     |                   |                |               |               |
|                 |                     |                   |                |               |               |
