# Supplementary material for: Contribution of women’s development army to maternal and child health in Ethiopia: a systematic review of evidence
Source: PubMed Central journal article supplement — BMJ Open. 2019 May 22;9(5):e025937. doi: 10.1136/bmjopen-2018-025937 (PMC6538000; doi:10.1136/bmjopen-2018-025937), 2019-05-22
Supplement: bmjopen-2018-025937supp004.pdf [file bmjopen-2018-025937supp004.pdf]

#### Supplementary file IV: Table of included studies

| Study                                               | Purpose                                                                                                                                                        | Study design    | Participants and sample size                                                                                                                                |
|-----------------------------------------------------|----------------------------------------------------------------------------------------------------------------------------------------------------------------|-----------------|-------------------------------------------------------------------------------------------------------------------------------------------------------------|
| Aregawi HG, Gebrehiwot TG et al, 2017 <sup>18</sup> | To identify the determinants of defaulting from child immunization completion among children aged 9-23 months in the Laelay Adiabo District, North Ethiopia.   | Case-control    | 270 children aged 9-23 months <ul style="list-style-type: none"> <li>• 90 cases and</li> <li>• 180 controls</li> </ul>                                      |
| Godefay H, Byass P et al, 2015 <sup>19</sup>        | To characterize individual risk factors for maternal mortality in Tigray, Ethiopia.                                                                            | Case-control    | The sample size was 310 <ul style="list-style-type: none"> <li>• 62 cases and</li> <li>• 248 controls</li> </ul> from six randomly-selected rural districts |
| Zepre K and Kaba M, 2017 <sup>22</sup>              | To assess the current BPCR practice and determine associated factors among rural women of reproductive age in Abeshige district, Guraghe zone, SNNPR, Ethiopia | Cross-sectional | 454 women who delivered within 12 months prior to this survey                                                                                               |
| Negero MG. et al, 2018 <sup>20</sup>                | To assess Skilled delivery service utilization and its association with the establishment of Women's Health Development army                                   | Cross-sectional | 748 reproductive-age women who gave birth in 1 year preceding the study in 380 clusters of WDA were included                                                |
| Girmaye M. and Berhan Y. <sup>21</sup>              | To assess Skilled ANC service utilization and its association with the establishment of                                                                        | Cross-sectional | 748 reproductive-age women who gave birth in 1 year preceding the study                                                                                     |

---

|                                                   | Women's Health Development army                                                                                                                                                           |             |                                                                                                                                                                                                                                                   |
|---------------------------------------------------|-------------------------------------------------------------------------------------------------------------------------------------------------------------------------------------------|-------------|---------------------------------------------------------------------------------------------------------------------------------------------------------------------------------------------------------------------------------------------------|
| Jackson R. and Hailemariam A., 2016 <sup>23</sup> | To examine the barriers and facilitators for HEWs as they refer women to mid-level health facilities for birth.                                                                           | Qualitative | 45 HEWs, 14 women extension workers (employed by Afar Pastoralist Development Association, Afar Region) and 11 other health workers from health centers, hospitals or health offices.                                                             |
| Jackson R. Tesfay FH. et al, 2017 <sup>24</sup>   | To document factors that hinder or enable strategies to reduce the first and second delays of the Three Delays in rural and pastoralist areas in Ethiopia                                 | Qualitative | A key informant study was conducted with 44 HEWs in Afar, SNNP, and Tigray Regions                                                                                                                                                                |
| Jackson R. Tesfay FH. et al, 2016 <sup>25</sup>   | To explored HEWs' and mother's attitudes to maternal health services in Adwa Woreda, Tigray Region.                                                                                       | Qualitative | 45 women were interviewed                                                                                                                                                                                                                         |
| Kok MC. et al., 2015 <sup>26</sup>                | To understand how relationships between HEWs, the community and health sector were shaped, in order to inform policy on optimizing HEW performance in providing maternal health services. | Qualitative | 14 FGDs with HEWs, women and men from the community and<br><br>44 semi-structured interviews with HEWs; key informants working in program management, health service delivery and supervision of HEWs; mothers; and traditional birth attendants. |

---
